# Supplementary material
Source: publisher figshare collection journal article supplement (https://acs.figshare.com/ndownloader/files/9732292)
Supplement: Supplementary file 1 [file 9732292]

# **Antiproliferative Dimeric Aporphinoid Alkaloids from the Roots of *Thalictrum cultratum***

Da-Hong Li,<sup>†,‡,Δ</sup> Jian-Yong Li,<sup>†,‡,Δ</sup> Chun-Mei Xue,<sup>†,‡</sup> Tong Han,<sup>†,‡</sup> Chun-Mei Sai,<sup>†,‡</sup>  
Kai-Bo Wang,<sup>‡</sup> Jin-Cai Lu,<sup>‡</sup> Yong-Kui Jing,<sup>†</sup> Hui-Ming Hua,<sup>†,‡</sup> and Zhan-Lin Li<sup>\*,†,‡</sup>

<sup>†</sup>Key Laboratory of Structure-Based Drug Design & Discovery, Ministry of Education, and <sup>‡</sup>School of Traditional Chinese Materia Medica, Shenyang Pharmaceutical University, Shenyang 110016, People's Republic of China.

\* To whom correspondence should be addressed. Tel/Fax: +86-24-23986465. E-mail: lz11030@hotmail.com.

## CONTENT

|                                                                                                    |    |
|----------------------------------------------------------------------------------------------------|----|
| Abstract.....                                                                                      | 4  |
| The spectra of all new compounds.....                                                              | 5  |
| Figure S1.1. IR spectrum of compound <b>1</b> .....                                                | 5  |
| Figure S1.2. UV spectrum of compound <b>1</b> .....                                                | 6  |
| Figure S1.3. <sup>1</sup> H NMR (600 MHz, CDCl <sub>3</sub> ) spectrum of compound <b>1</b> .....  | 7  |
| Figure S1.4. <sup>13</sup> C NMR (150 MHz, CDCl <sub>3</sub> ) spectrum of compound <b>1</b> ..... | 7  |
| Figure S1.5. HSQC (600 MHz, CDCl <sub>3</sub> ) spectrum of compound <b>1</b> .....                | 8  |
| Figure S1.6. HMBC (600 MHz, CDCl <sub>3</sub> ) spectrum of compound <b>1</b> .....                | 8  |
| Figure S1.7. NOESY (600 MHz, CDCl <sub>3</sub> ) spectrum of compound <b>1</b> .....               | 9  |
| Figure S1.8. HRESIMS of compound <b>1</b> .....                                                    | 10 |
| Figure S1.9. ECD spectrum of compound <b>1</b> .....                                               | 11 |
| Figure S2.1. IR spectrum of compound <b>2</b> .....                                                | 12 |
| Figure S2.2. UV spectrum of compound <b>2</b> .....                                                | 13 |
| Figure S2.3. <sup>1</sup> H NMR (400 MHz, CDCl <sub>3</sub> ) spectrum of compound <b>2</b> .....  | 14 |
| Figure S2.4. <sup>13</sup> C NMR (150 MHz, CDCl <sub>3</sub> ) spectrum of compound <b>2</b> ..... | 14 |
| Figure S2.5. HSQC (600 MHz, CDCl <sub>3</sub> ) spectrum of compound <b>2</b> .....                | 15 |
| Figure S2.6. HMBC (600 MHz, CDCl <sub>3</sub> ) spectrum of compound <b>2</b> .....                | 15 |
| Figure S2.7. HRESIMS of compound <b>2</b> .....                                                    | 16 |
| Figure S2.8. ECD spectrum of compound <b>2</b> .....                                               | 17 |
| Figure S2.9. Key HMBC correlations of compound <b>2</b> .....                                      | 17 |
| Figure S3.1. IR spectrum of compound <b>3</b> .....                                                | 18 |
| Figure S3.2. UV spectrum of compound <b>3</b> .....                                                | 19 |
| Figure S3.3. <sup>1</sup> H NMR (600 MHz, CDCl <sub>3</sub> ) spectrum of compound <b>3</b> .....  | 20 |
| Figure S3.4. <sup>13</sup> C NMR (150 MHz, CDCl <sub>3</sub> ) spectrum of compound <b>3</b> ..... | 20 |
| Figure S3.5. HSQC (600 MHz, CDCl <sub>3</sub> ) spectrum of compound <b>3</b> .....                | 21 |
| Figure S3.6. HMBC (600 MHz, CDCl <sub>3</sub> ) spectrum of compound <b>3</b> .....                | 21 |
| Figure S3.7. NOESY (600 MHz, CDCl <sub>3</sub> ) spectrum of compound <b>3</b> .....               | 22 |
| Figure S3.8. HRESIMS of compound <b>3</b> .....                                                    | 23 |
| Figure S3.9. ECD spectrum of compound <b>3</b> .....                                               | 24 |
| Figure S3.10. Key HMBC correlations of compound <b>3</b> .....                                     | 24 |
| Figure S3.11. Key NOESY correlations of compound <b>3</b> .....                                    | 25 |
| Figure S4.1. IR spectrum of compound <b>7</b> .....                                                | 26 |
| Figure S4.2. UV spectrum of compound <b>7</b> .....                                                | 27 |
| Figure S4.3. <sup>1</sup> H NMR (600 MHz, CDCl <sub>3</sub> ) spectrum of compound <b>7</b> .....  | 28 |
| Figure S4.4. <sup>13</sup> C NMR (150 MHz, CDCl <sub>3</sub> ) spectrum of compound <b>7</b> ..... | 28 |
| Figure S4.5. HSQC (600 MHz, CDCl <sub>3</sub> ) spectrum of compound <b>7</b> .....                | 29 |
| Figure S4.6. HMBC (600 MHz, CDCl <sub>3</sub> ) spectrum of compound <b>7</b> .....                | 29 |
| Figure S4.7. HRESIMS of compound <b>7</b> .....                                                    | 30 |
| Figure S4.8. ECD spectrum of compound <b>7</b> .....                                               | 31 |
| Figure S5.1. IR spectrum of compound <b>8</b> .....                                                | 32 |
| Figure S5.2. UV spectrum of compound <b>8</b> .....                                                | 33 |
| Figure S5.3. <sup>1</sup> H NMR (600 MHz, CDCl <sub>3</sub> ) spectrum of compound <b>8</b> .....  | 34 |
| Figure S5.4. <sup>13</sup> C NMR (150 MHz, CDCl <sub>3</sub> ) spectrum of compound <b>8</b> ..... | 34 |

|                                                                                                     |    |
|-----------------------------------------------------------------------------------------------------|----|
| Figure S5.5. HSQC (600 MHz, CDCl <sub>3</sub> ) spectrum of compound <b>8</b> .....                 | 35 |
| Figure S5.6. HMBC (600 MHz, CDCl <sub>3</sub> ) spectrum of compound <b>8</b> .....                 | 35 |
| Figure S5.7. NOESY (600 MHz, CDCl <sub>3</sub> ) spectrum of compound <b>8</b> .....                | 36 |
| Figure S5.8. HRESIMS of compound <b>8</b> .....                                                     | 37 |
| Figure S5.9. ECD spectrum of compound <b>8</b> .....                                                | 38 |
| Figure S5.10. Key HMBC correlations of compound <b>8</b> .....                                      | 39 |
| Figure S5.11. Key NOESY correlations of compound <b>8</b> .....                                     | 39 |
| Figure S6.1. IR spectrum of compound <b>9</b> .....                                                 | 40 |
| Figure S6.2. UV spectrum of compound <b>9</b> .....                                                 | 41 |
| Figure S6.3. <sup>1</sup> H NMR (600 MHz, CDCl <sub>3</sub> ) spectrum of compound <b>9</b> .....   | 42 |
| Figure S6.4. <sup>13</sup> C NMR (150 MHz, CDCl <sub>3</sub> ) spectrum of compound <b>9</b> .....  | 42 |
| Figure S6.5. HSQC (600 MHz, CDCl <sub>3</sub> ) spectrum of compound <b>9</b> .....                 | 43 |
| Figure S6.6. HMBC (600 MHz, CDCl <sub>3</sub> ) spectrum of compound <b>9</b> .....                 | 43 |
| Figure S6.7. HRESIMS of compound <b>9</b> .....                                                     | 44 |
| Figure S6.8. ECD spectrum of compound <b>9</b> .....                                                | 45 |
| Figure S6.9. Key HMBC correlations of compound <b>9</b> .....                                       | 45 |
| Figure S7.1. IR spectrum of compound <b>10</b> .....                                                | 46 |
| Figure S7.2. UV spectrum of compound <b>10</b> .....                                                | 47 |
| Figure S7.3. <sup>1</sup> H NMR (600 MHz, CDCl <sub>3</sub> ) spectrum of compound <b>10</b> .....  | 48 |
| Figure S7.4. <sup>13</sup> C NMR (150 MHz, CDCl <sub>3</sub> ) spectrum of compound <b>10</b> ..... | 48 |
| Figure S7.5. HSQC (600 MHz, CDCl <sub>3</sub> ) spectrum of compound <b>10</b> .....                | 49 |
| Figure S7.6. HMBC (600 MHz, CDCl <sub>3</sub> ) spectrum of compound <b>10</b> .....                | 49 |
| Figure S7.7. NOESY (600 MHz, CDCl <sub>3</sub> ) spectrum of compound <b>10</b> .....               | 50 |
| Figure S7.8. HRESIMS of compound <b>10</b> .....                                                    | 51 |
| Figure S7.9. ECD spectrum of compound <b>10</b> .....                                               | 52 |
| Figure S7.10. Key HMBC correlations of compound <b>10</b> .....                                     | 53 |
| Figure S7.11. Key NOESY correlations of compound <b>10</b> .....                                    | 53 |
| Figure S8.1. IR spectrum of compound <b>12</b> .....                                                | 54 |
| Figure S8.2. UV spectrum of compound <b>12</b> .....                                                | 55 |
| Figure S8.3. <sup>1</sup> H NMR (600 MHz, CDCl <sub>3</sub> ) spectrum of compound <b>12</b> .....  | 56 |
| Figure S8.4. <sup>13</sup> C NMR (100 MHz, CDCl <sub>3</sub> ) spectrum of compound <b>12</b> ..... | 56 |
| Figure S8.5. HSQC (600 MHz, CDCl <sub>3</sub> ) spectrum of compound <b>12</b> .....                | 57 |
| Figure S8.6. HMBC (600 MHz, CDCl <sub>3</sub> ) spectrum of compound <b>12</b> .....                | 57 |
| Figure S8.7. NOESY (600 MHz, CDCl <sub>3</sub> ) spectrum of compound <b>12</b> .....               | 58 |
| Figure S8.8. HRESIMS of compound <b>12</b> .....                                                    | 59 |
| Figure S8.9. ECD spectrum of compound <b>12</b> .....                                               | 60 |
| Figure S8.10. Key HMBC correlations of compound <b>12</b> .....                                     | 61 |
| Figure S8.11. Key NOESY correlations of compound <b>12</b> .....                                    | 61 |
| Figure S9.1. IR spectrum of compound <b>13</b> .....                                                | 62 |
| Figure S9.2. <sup>1</sup> H NMR (400 MHz, CDCl <sub>3</sub> ) spectrum of compound <b>13</b> .....  | 63 |
| Figure S9.3. <sup>13</sup> C NMR (100 MHz, CDCl <sub>3</sub> ) spectrum of compound <b>13</b> ..... | 63 |
| Figure S9.4. HSQC (600 MHz, CDCl <sub>3</sub> ) spectrum of compound <b>13</b> .....                | 64 |
| Figure S9.5. HMBC (600 MHz, CDCl <sub>3</sub> ) spectrum of the new compound <b>13</b> .....        | 64 |
| Figure S9.6. NOESY (600 MHz, CDCl <sub>3</sub> ) spectrum of compound <b>13</b> .....               | 65 |

|                                                                                                      |    |
|------------------------------------------------------------------------------------------------------|----|
| Figure S9.7. HRESIMS of compound <b>13</b> .....                                                     | 66 |
| Figure S9.8. ECD spectrum of compound <b>13</b> .....                                                | 67 |
| Figure S9.9. Key HMBC correlations of compound <b>13</b> .....                                       | 67 |
| Figure S10.1. IR spectrum of compound <b>14</b> .....                                                | 68 |
| Figure S10.2. UV spectrum of compound <b>14</b> .....                                                | 69 |
| Figure S10.3. <sup>1</sup> H NMR (600 MHz, CDCl <sub>3</sub> ) spectrum of compound <b>14</b> .....  | 70 |
| Figure S10.4. <sup>13</sup> C NMR (100 MHz, CDCl <sub>3</sub> ) spectrum of compound <b>14</b> ..... | 70 |
| Figure S10.5. HSQC (600 MHz, CDCl <sub>3</sub> ) spectrum of compound <b>14</b> .....                | 71 |
| Figure S10.7. NOESY (600 MHz, CDCl <sub>3</sub> ) spectrum of compound <b>14</b> .....               | 72 |
| Figure S10.8. HRESIMS of compound <b>14</b> .....                                                    | 73 |
| Figure S10.9. ECD spectrum of compound <b>14</b> .....                                               | 74 |
| Figure S10.10. Key NOESY correlations of compound <b>14</b> .....                                    | 75 |
| Figure S11.1. IR spectrum of compound <b>15</b> .....                                                | 76 |
| Figure S11.2. <sup>1</sup> H NMR (400 MHz, CDCl <sub>3</sub> ) spectrum of compound <b>15</b> .....  | 77 |
| Figure S11.3. <sup>13</sup> C NMR (100 MHz, CDCl <sub>3</sub> ) spectrum of compound <b>15</b> ..... | 77 |
| Figure S11.4. NOESY (600 MHz, CDCl <sub>3</sub> ) spectrum of compound <b>15</b> .....               | 78 |
| Figure S11.5. HRESIMS of compound <b>15</b> .....                                                    | 79 |
| Figure S11.6. ECD spectrum of compound <b>15</b> .....                                               | 80 |
| Figure S12.1. IR spectrum of compound <b>16</b> .....                                                | 81 |
| Figure S12.2. UV spectrum of compound <b>16</b> .....                                                | 82 |
| Figure S12.3. <sup>1</sup> H NMR (600 MHz, CDCl <sub>3</sub> ) spectrum of compound <b>16</b> .....  | 83 |
| Figure S12.4. <sup>13</sup> C NMR (100 MHz, CDCl <sub>3</sub> ) spectrum of compound <b>16</b> ..... | 83 |
| Figure S12.5. HSQC (600 MHz, CDCl <sub>3</sub> ) spectrum of compound <b>16</b> .....                | 84 |
| Figure S12.6. HMBC (600 MHz, CDCl <sub>3</sub> ) spectrum of compound <b>16</b> .....                | 84 |
| Figure S12.7. NOESY (600 MHz, CDCl <sub>3</sub> ) spectrum of compound <b>16</b> .....               | 85 |
| Figure S12.8. HRESIMS of compound <b>16</b> .....                                                    | 86 |
| Figure S12.9. ECD spectrum of compound <b>16</b> .....                                               | 87 |



## Abstract

Inspired by the intriguing structures and bioactivities of dimeric alkaloids, 11 new thalifaberine-type aporphine-benzylisoquinoline alkaloids thalicultratinines A–K, a tetrahydroprotoberberine-aporphine alkaloid thalicultratine L, and five known ones were isolated from the roots of *Thalictrum cultratum* Wall. Their structures were defined on the basis of NMR and HRESIMS data. The antiproliferative activities of compounds **1–17** were evaluated against human leukemia HL-60 and prostate cancer PC-3 cells. Most alkaloids showed potent cytotoxicity against selected cancer cells. Preliminary SARs are discussed. The most active new compound **3** with an IC<sub>50</sub> value of 1.06  $\mu$ M against HL-60 cells was selected for mechanism of action studies. The results revealed that compound **3** induced apoptosis and arrest the HL-60 cell cycle at the S phase with the loss of mitochondria membrane potential. The nuclear morphological Hoechst 33258 staining assay was also carried out and the results confirmed apoptosis.

## The spectra of all new compounds

**Figure S1.1.** IR spectrum of compound **1**

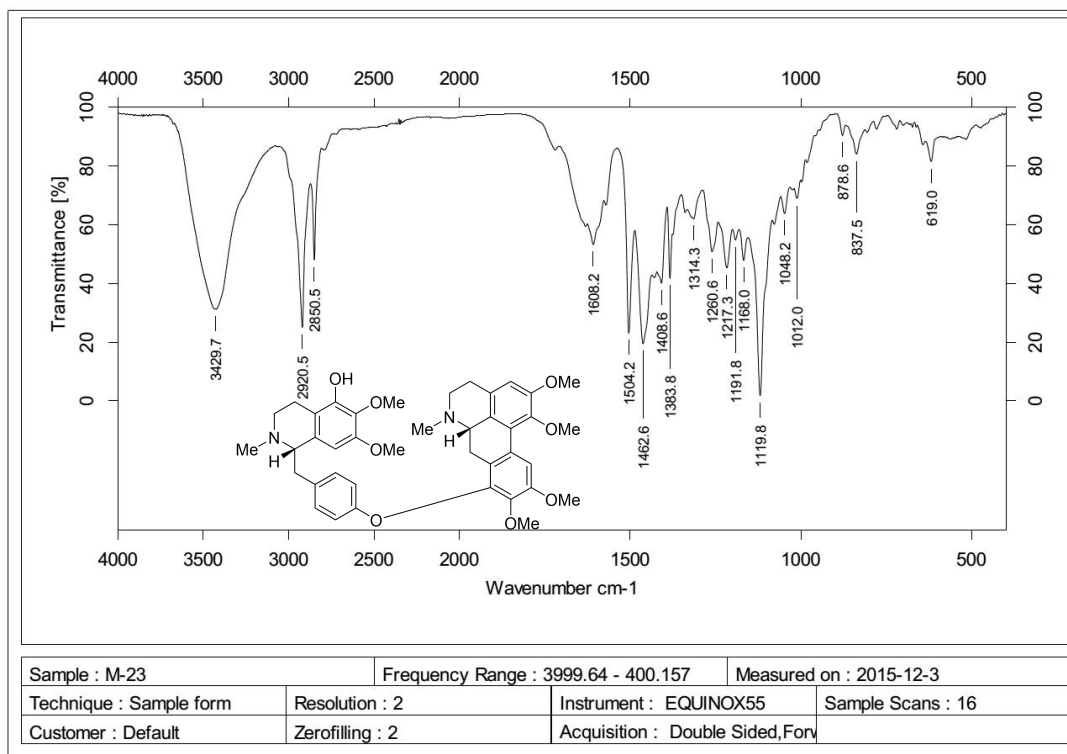

Figure S1.2. UV spectrum of compound 1

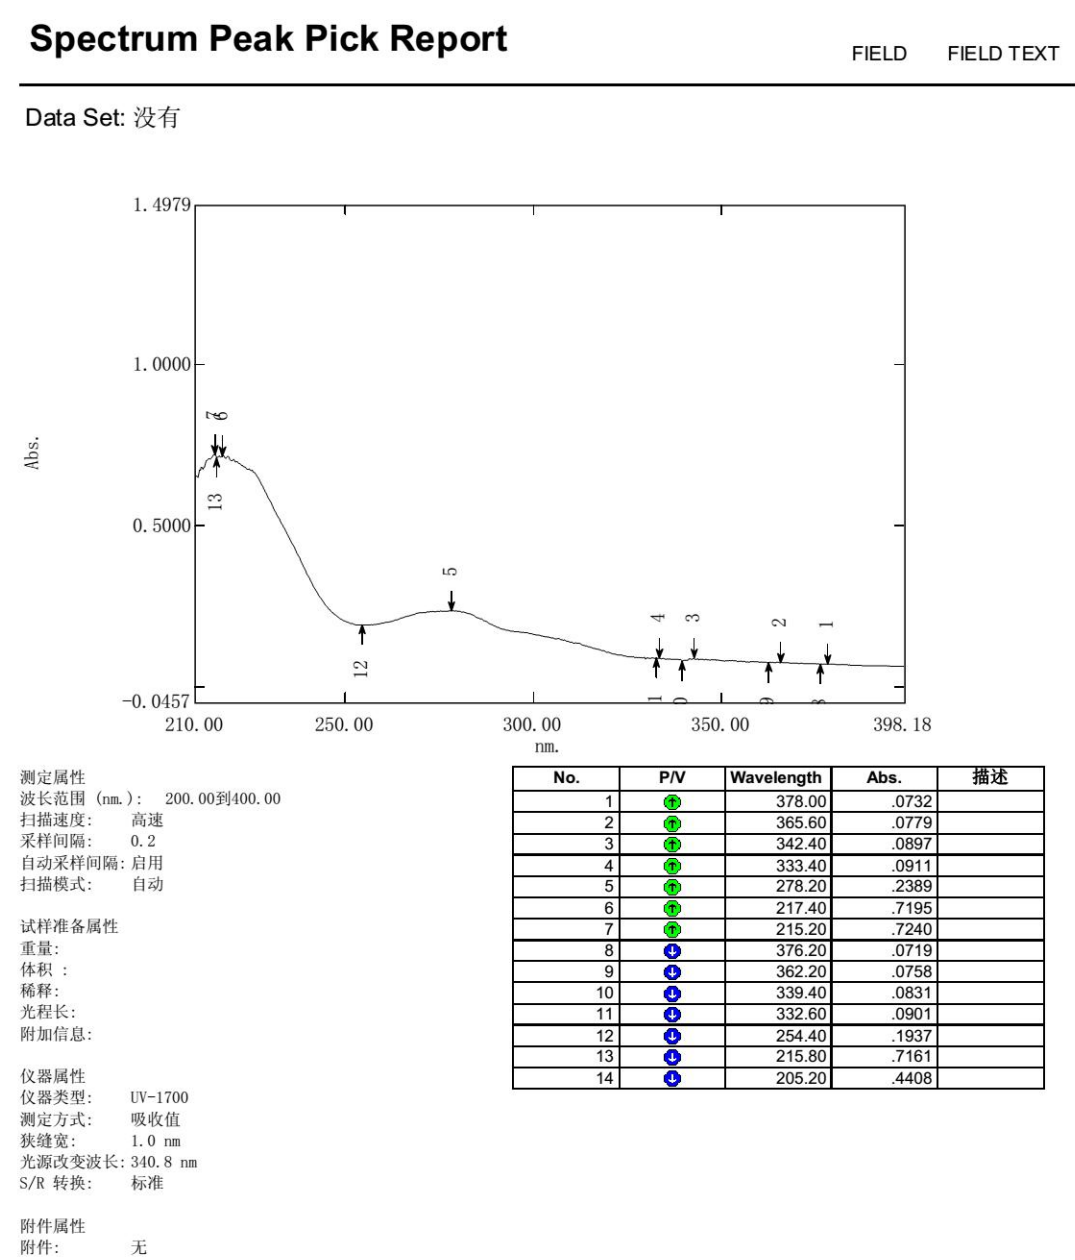

FIELD TEXT

**Figure S1.3.**  $^1\text{H}$  NMR (600 MHz,  $\text{CDCl}_3$ ) spectrum of compound **1**

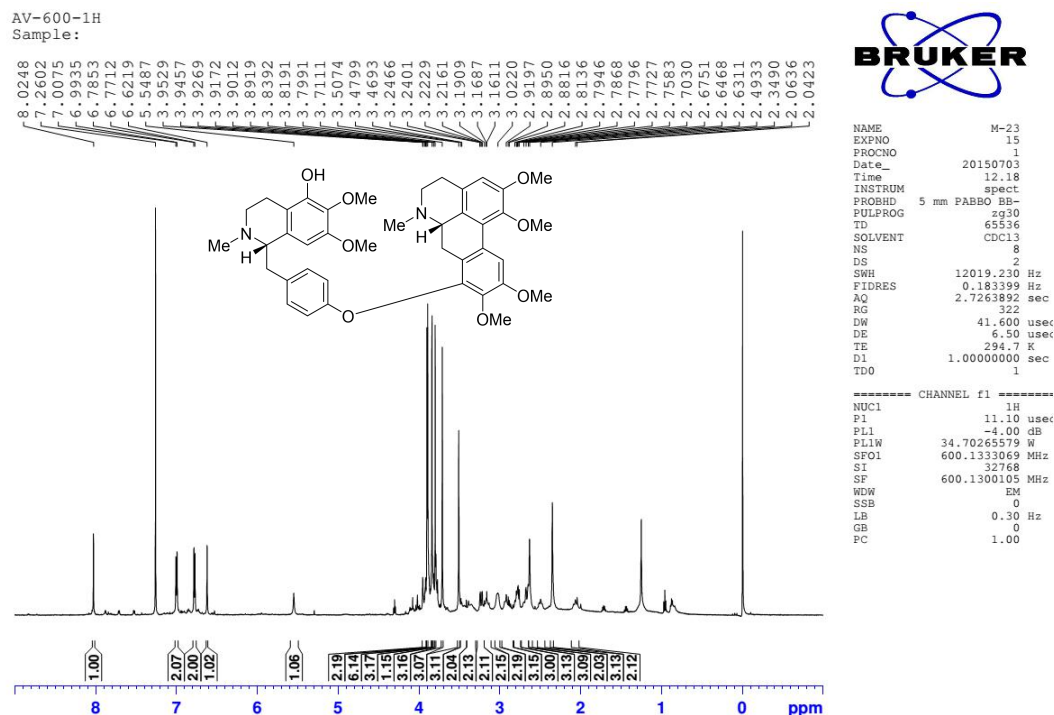

**Figure S1.4.**  $^{13}\text{C}$  NMR (150 MHz,  $\text{CDCl}_3$ ) spectrum of compound **1**

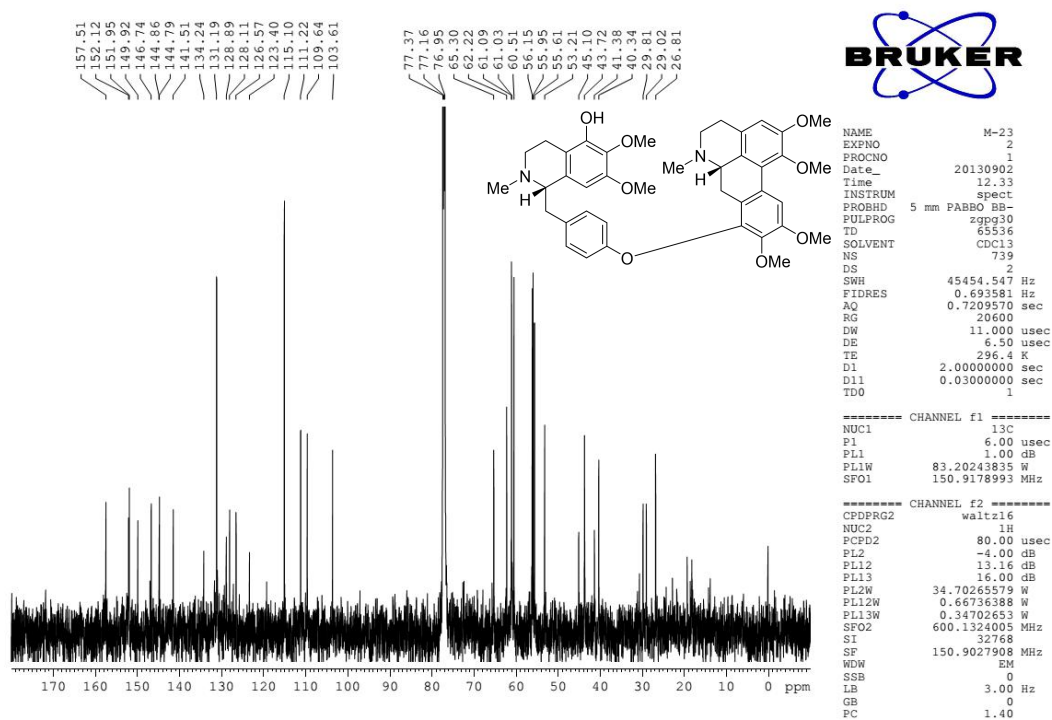

Figure S1.5. HSQC (600 MHz, CDCl<sub>3</sub>) spectrum of compound 1

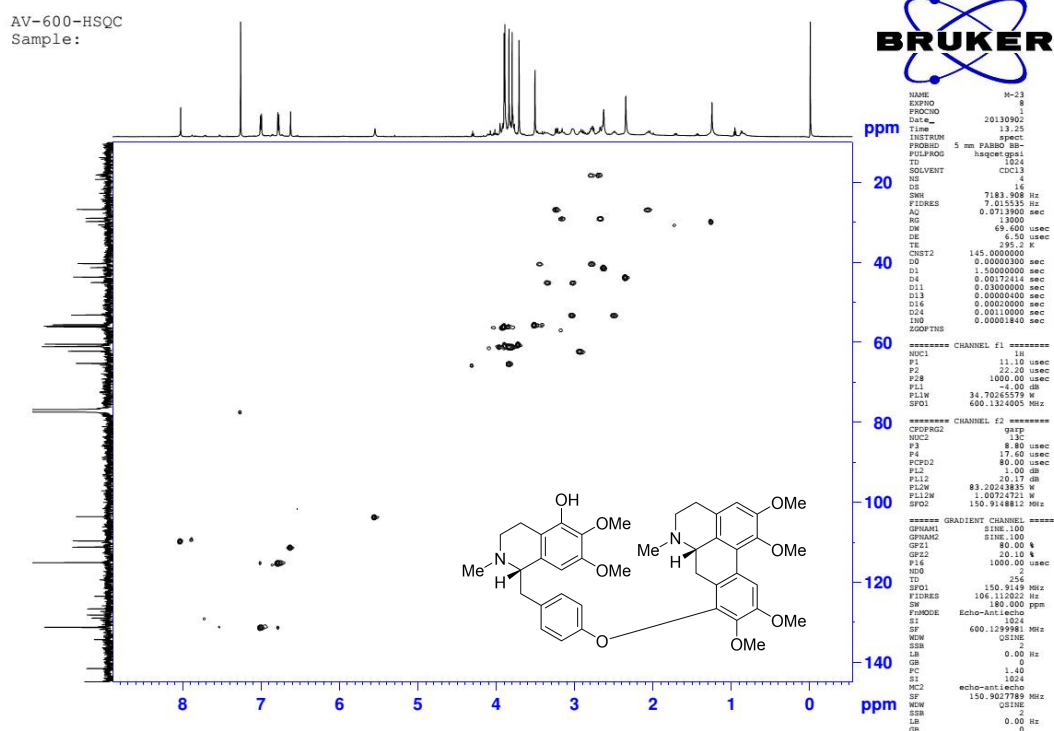

Figure S1.6. HMBC (600 MHz, CDCl<sub>3</sub>) spectrum of compound 1

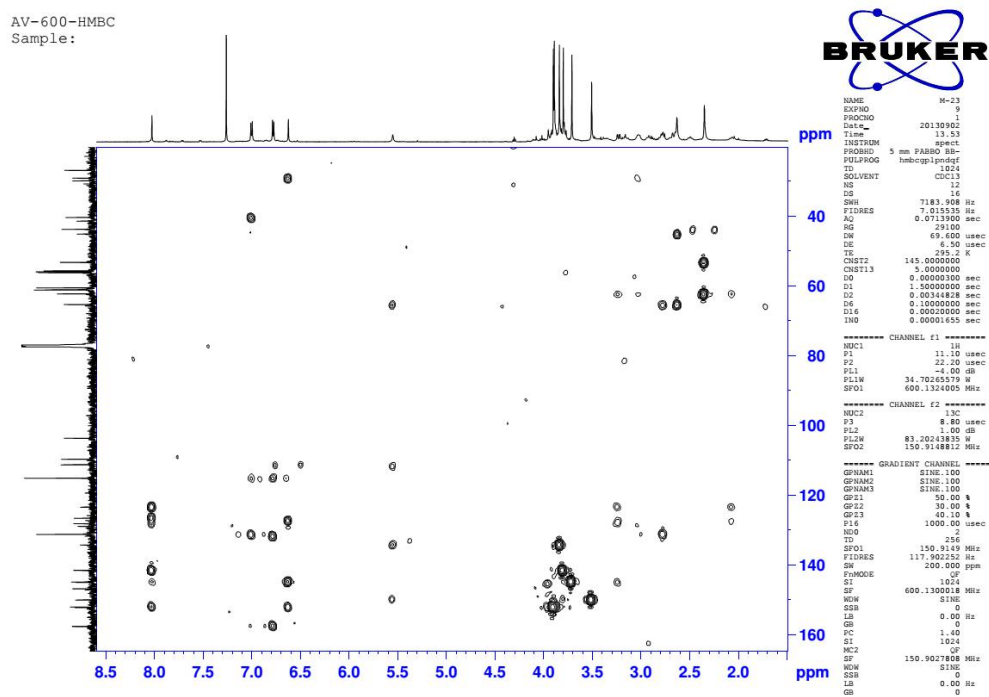

**Figure S1.7.** NOESY (600 MHz, CDCl<sub>3</sub>) spectrum of compound **1**

AV-600-NOESY  
Sample:

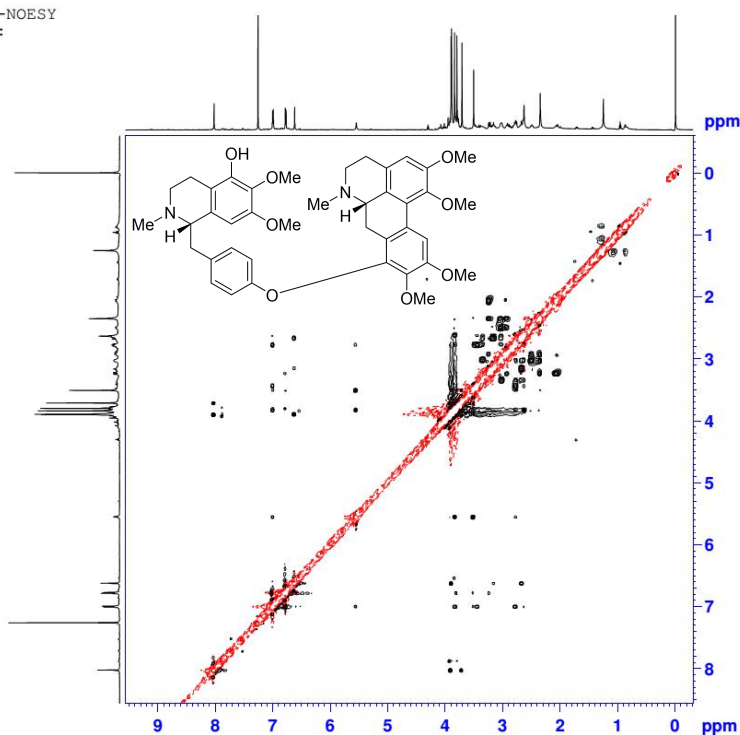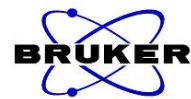

NAME M-23  
EXPNO 7  
PROCNO 1  
Date\_ 20130902  
Time 12.39  
INSTRUM spect  
PROBHD 5 mm PABBO BB-  
PULPROG noesyph  
TD 1024  
SOLVENT CDCl3  
NS 4  
DS 4  
SWH 7183.908 Hz  
FIDRES 7.015535 Hz  
AQ 0.0713900 sec  
RG 203  
DW 69.600 usec  
DE 6.50 usec  
TE 295.9 K  
D0 0.00005547 sec  
D1 2.00000000 sec  
D8 0.60000002 sec  
IN0 0.00013920 sec

===== CHANNEL f1 =====  
NUC1 1H  
P1 11.10 usec  
PL1 -4.00 dB  
PL1W 34.70265579 W  
SF01 600.1324005 MHz  
ND0 1  
TD 256  
SF01 600.1324 MHz  
FIDRES 28.062050 Hz  
SW 11.970 ppm  
FnmODE States-TPPI  
SI 1024  
SF 600.1300041 MHz  
WDW QSINE  
SSB 2  
LB 0.00 Hz  
GB 0  
PC 1.00  
SI 1024  
MC2 States-TPPI  
SF 600.1300042 MHz  
WDW QSINE  
SSB 2  
LB 0.00 Hz  
GB 0

**Figure S1.8.** HRESIMS of compound **1**

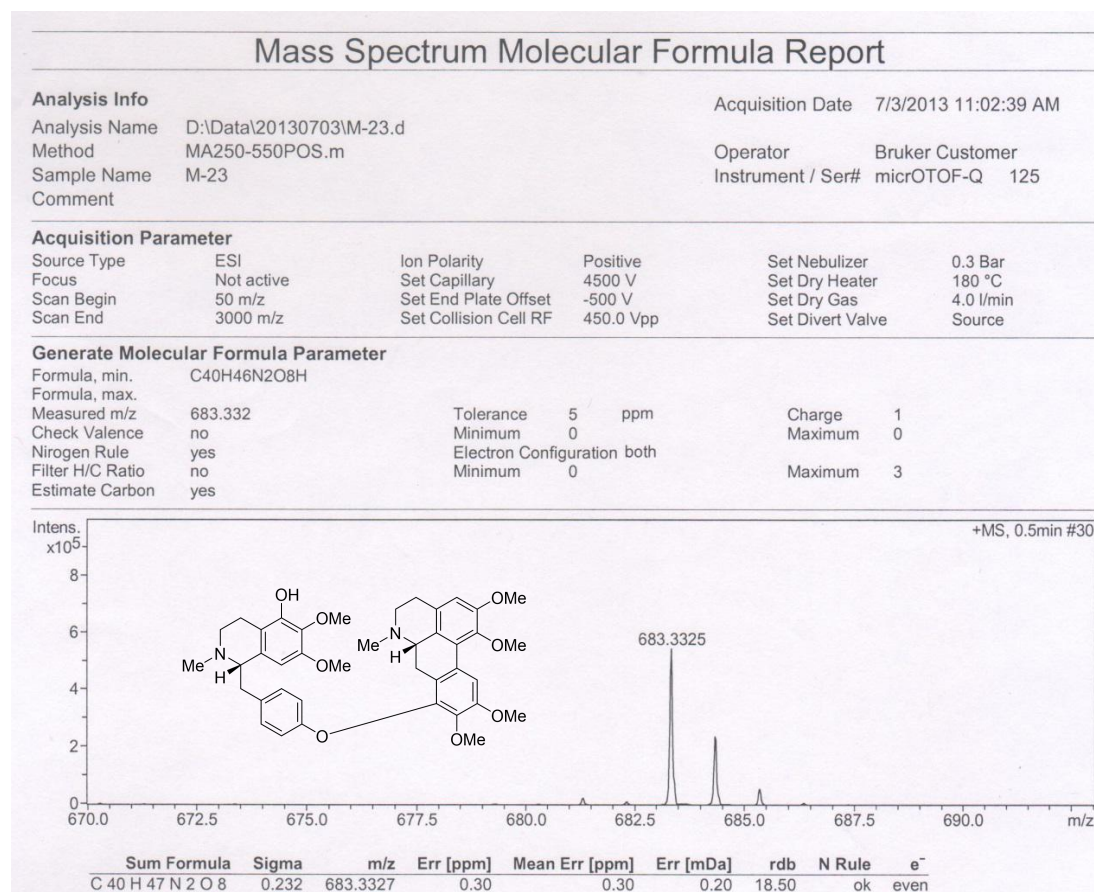

**Figure S1.9.** ECD spectrum of compound **1**

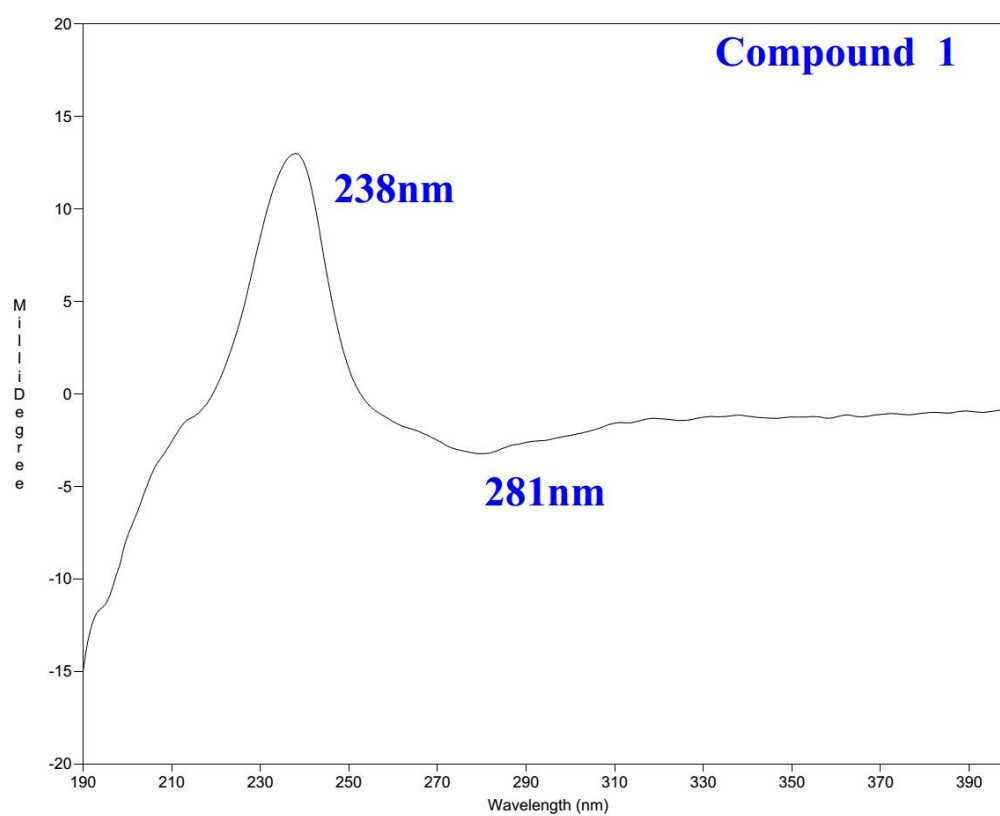

Bio-Kine Software V4.71 Date : 2014-3-7 Time : 13:55:46

**COMMENTS :**

File name : sav-golay  
Savitzky-Golay Smooth of sav-golay  
Window Points=15  
Polynomial Order=3  
Derivative=0



**Figure S2.1.** IR spectrum of compound **2**

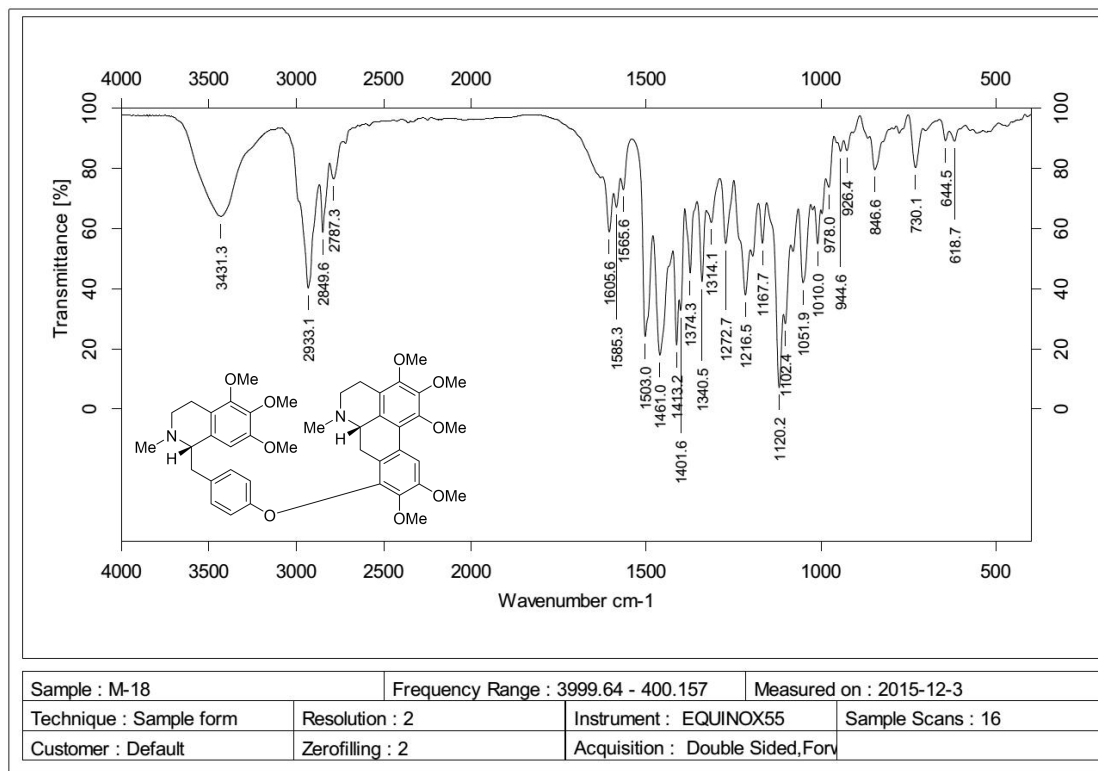

Figure S2.2. UV spectrum of compound 2

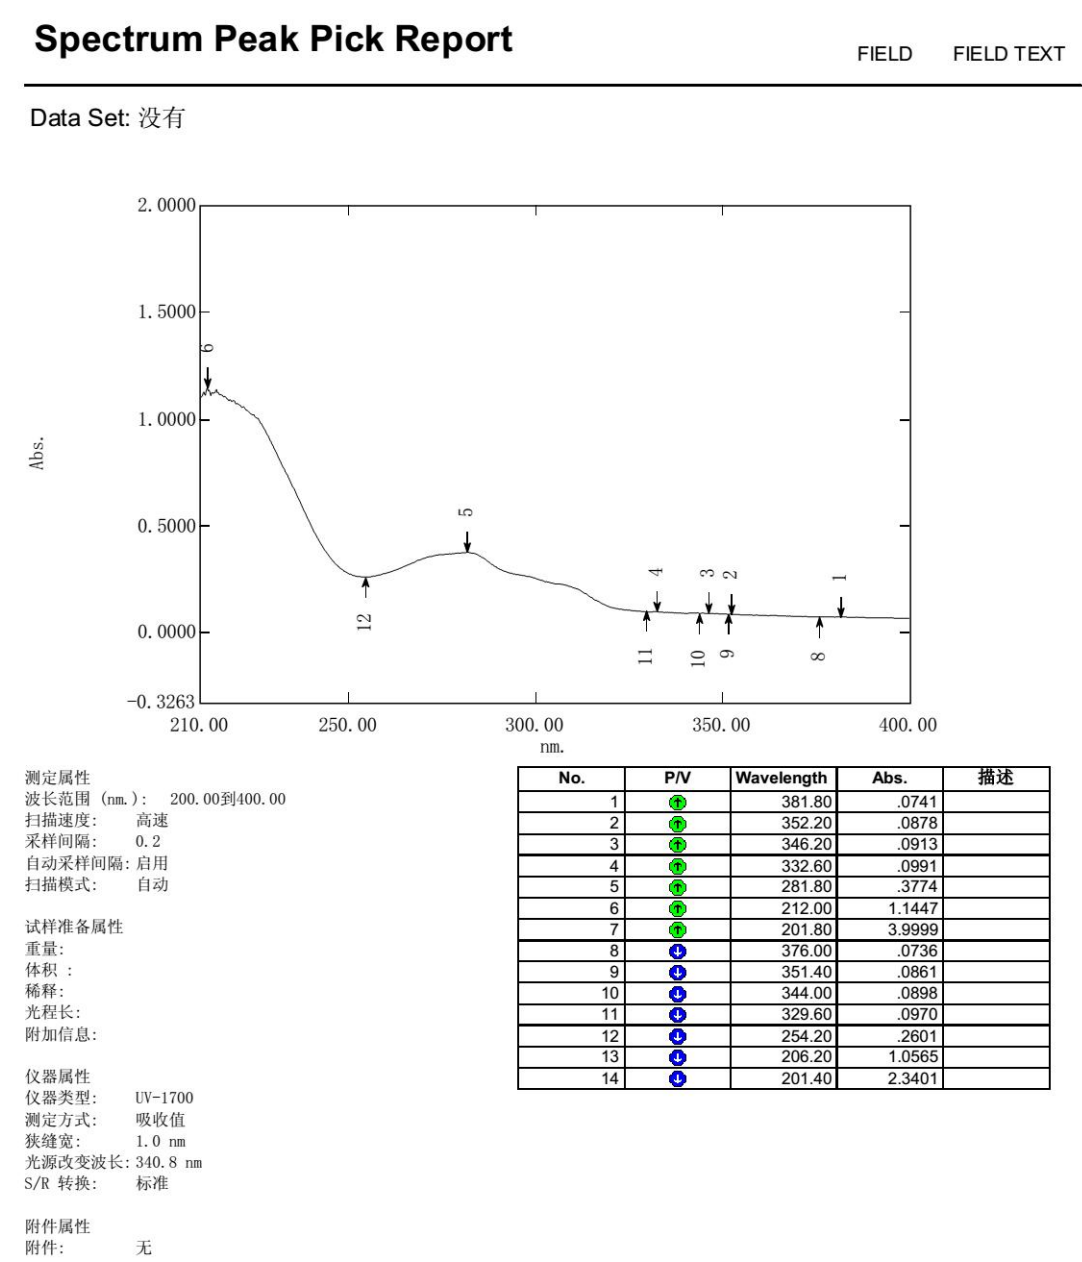

**Figure S2.3.**  $^1\text{H}$  NMR (400 MHz,  $\text{CDCl}_3$ ) spectrum of compound **2**

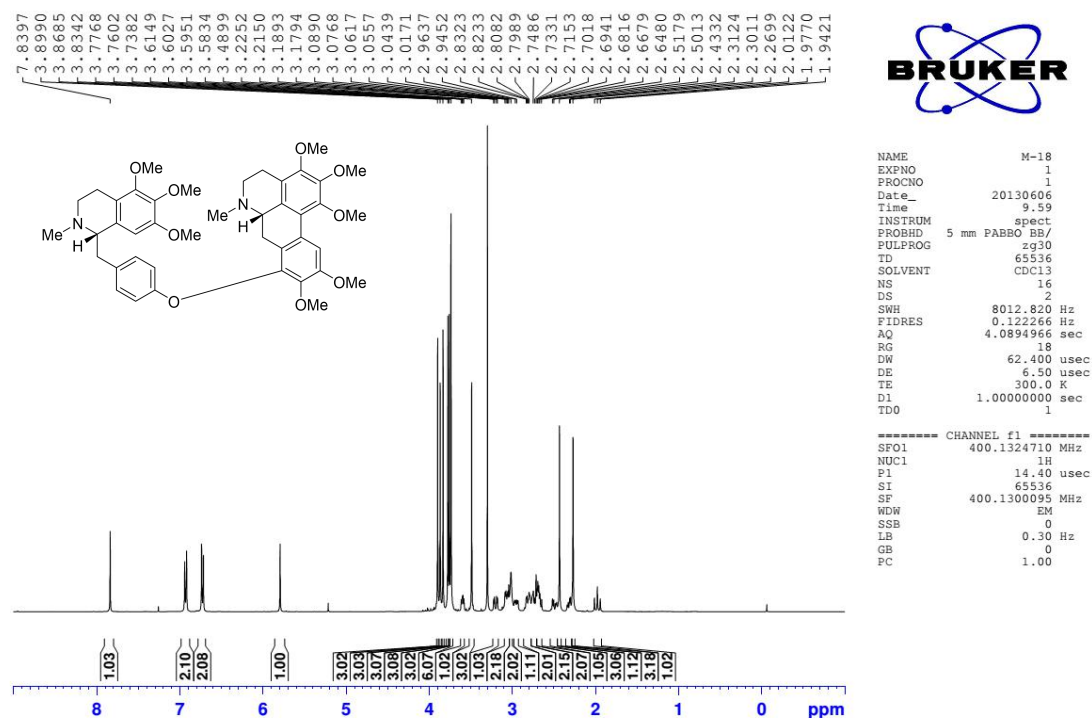

**Figure S2.4.**  $^{13}\text{C}$  NMR (150 MHz,  $\text{CDCl}_3$ ) spectrum of compound **2**

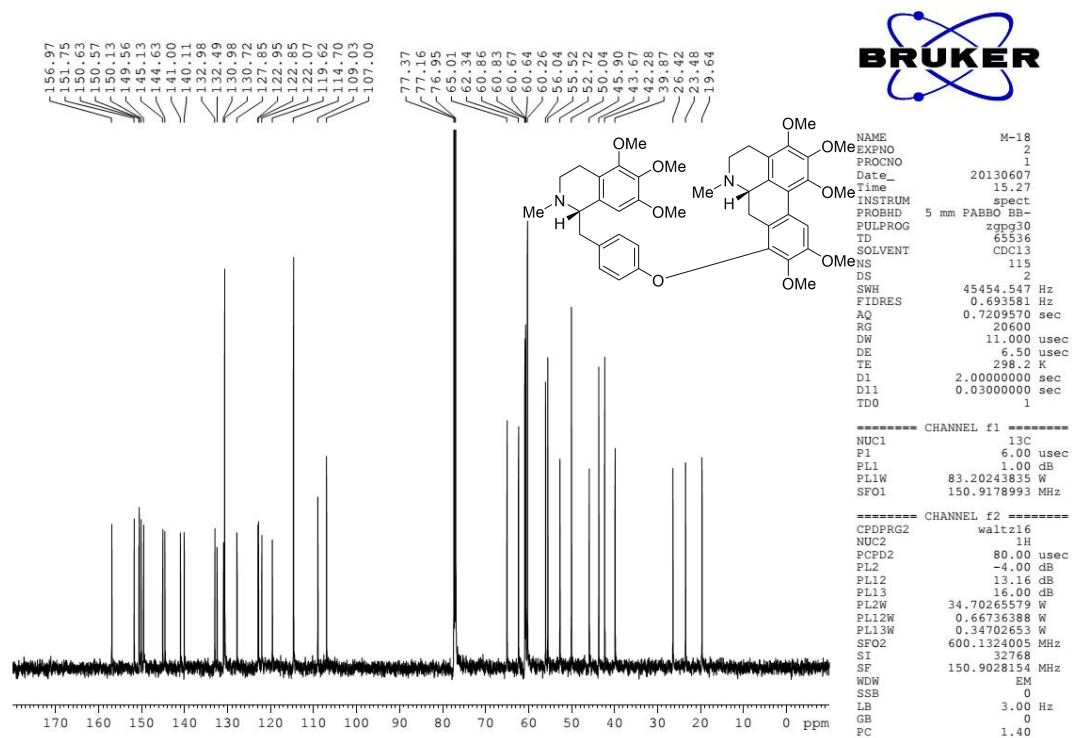

**Figure S2.5.** HSQC (600 MHz, CDCl<sub>3</sub>) spectrum of compound 2

AV-600-HSQC  
Sample:

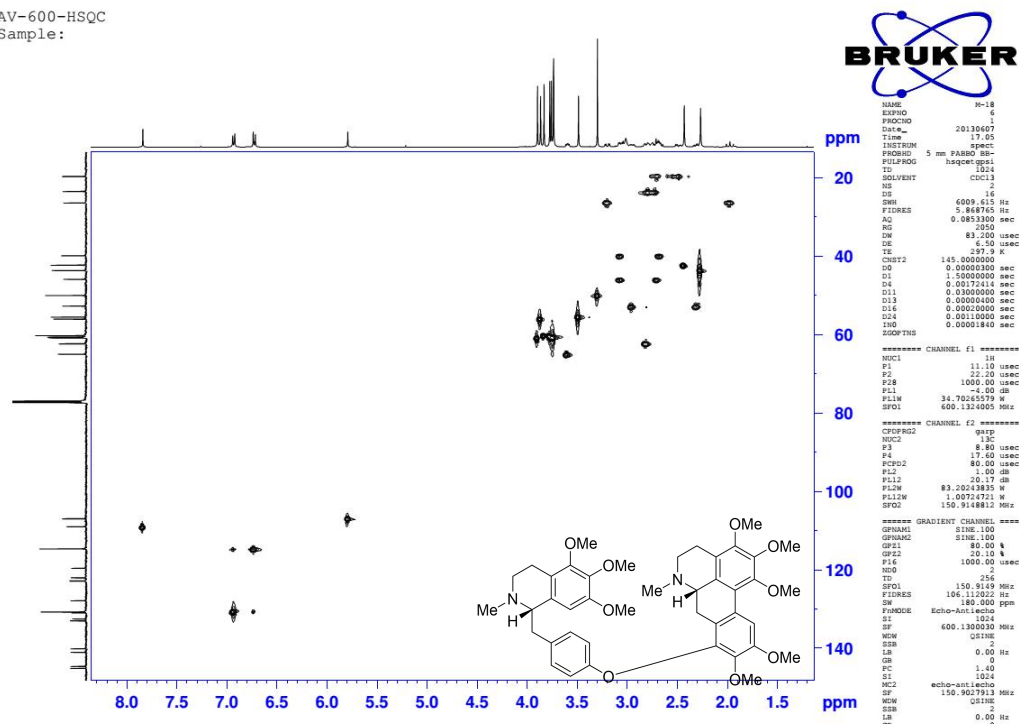

**Figure S2.6.** HMBC (600 MHz, CDCl<sub>3</sub>) spectrum of compound 2

AV-600-HMBC  
Sample:

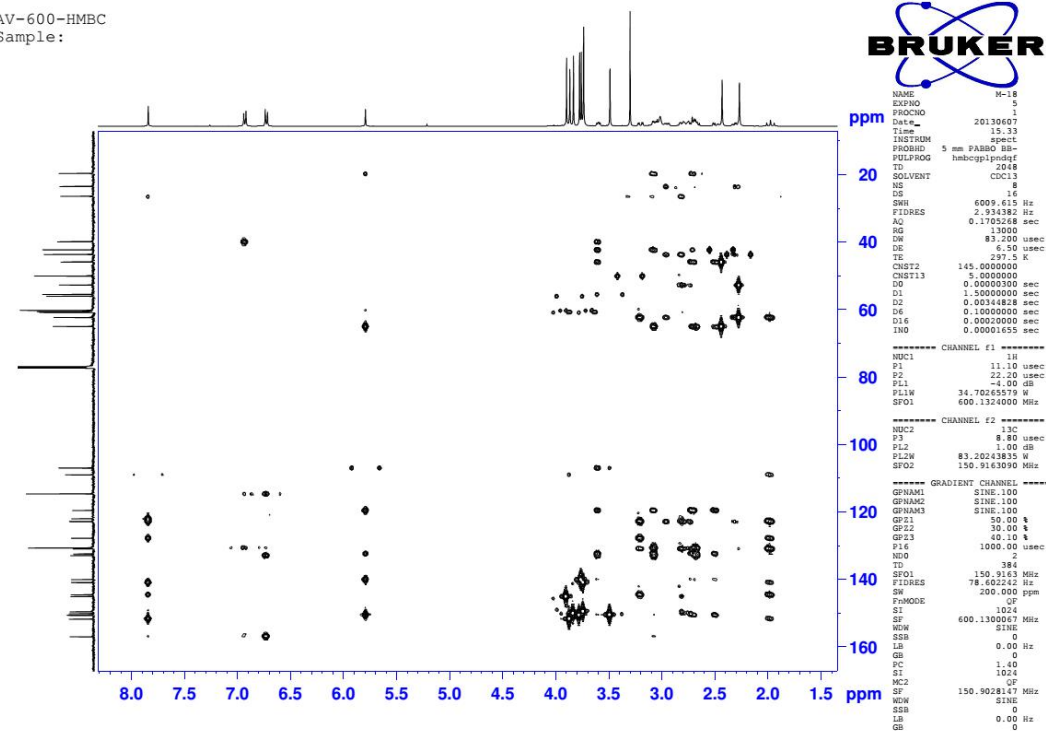

**Figure S2.7. HRESIMS of compound 2**

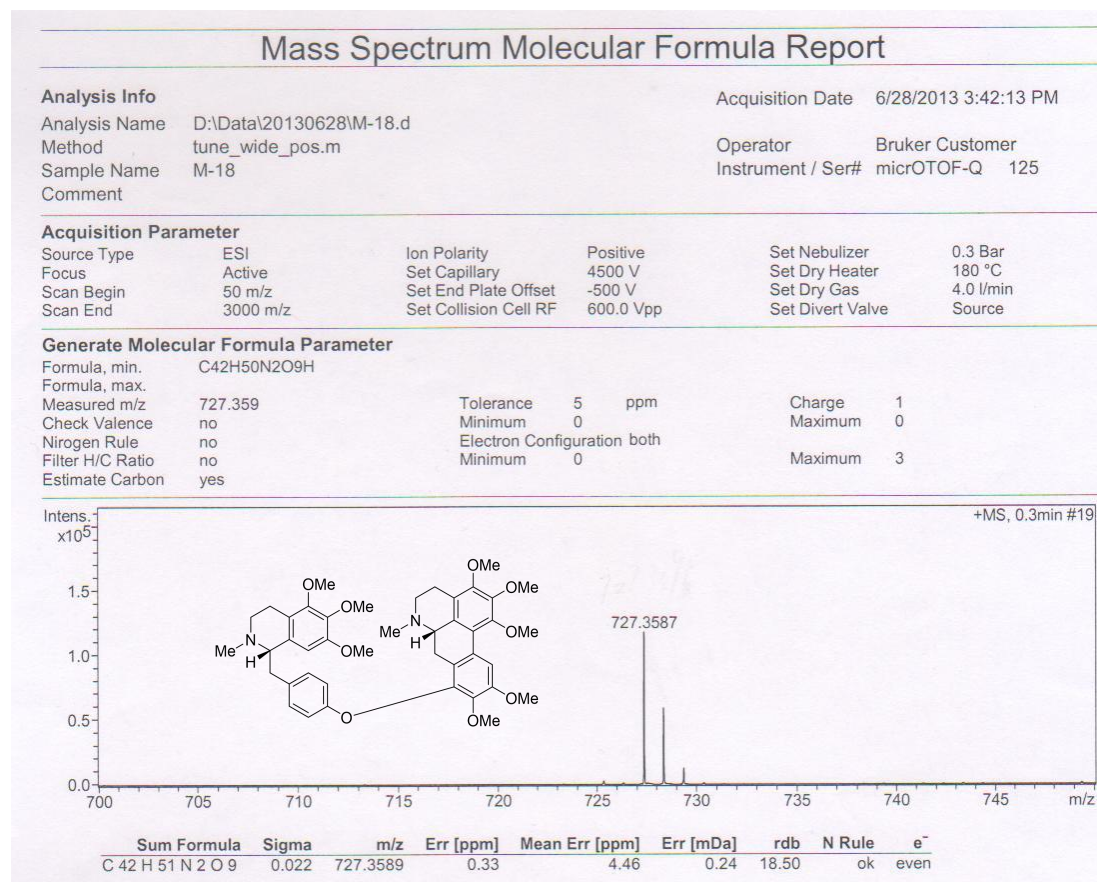

**Figure S2.8.** ECD spectrum of compound **2**

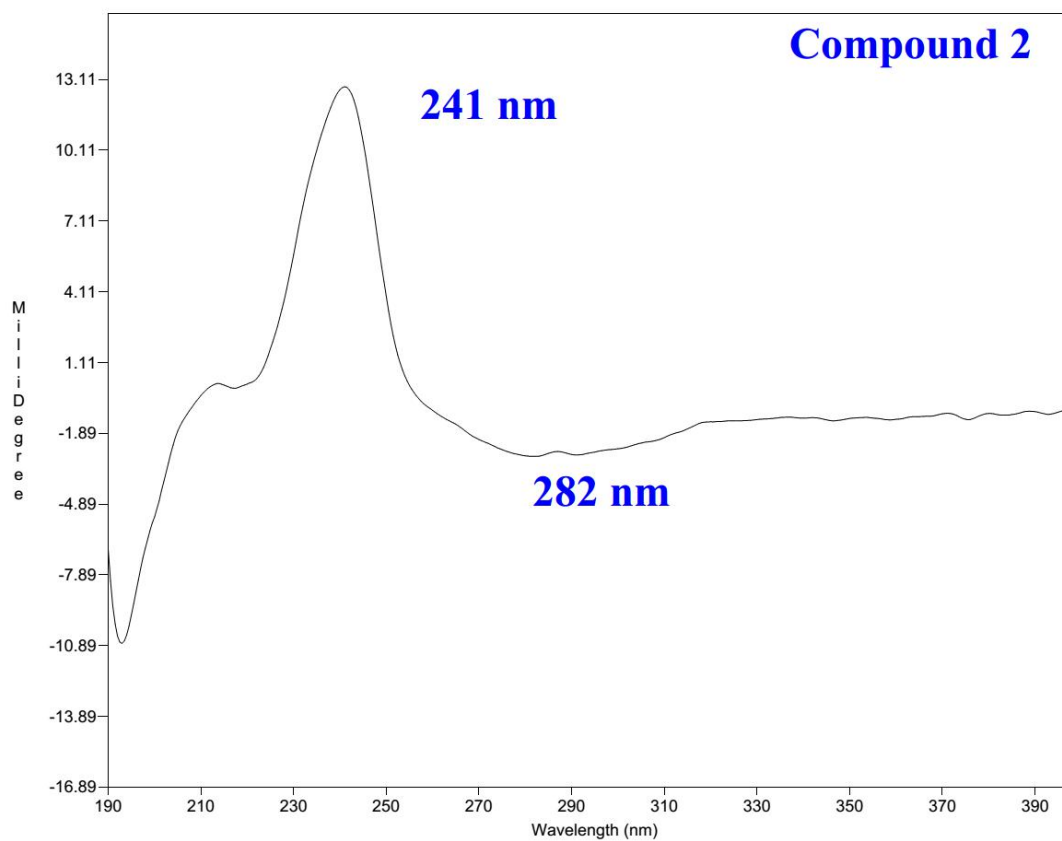

Bio-Kine Software V4.71 Date : 2014-3-7 Time : 13:41:12

**COMMENTS :**

File name : sav-golay  
Savitzky-Golay Smooth of sav-golay  
Window Points=15  
Polynomial Order=3  
Derivative=0

**Figure S2.9.** Key HMBC correlations of compound **2**

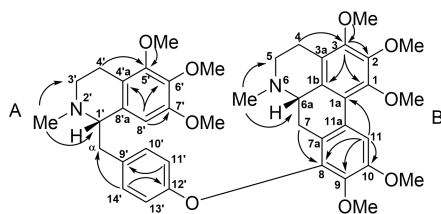

**Figure S3.1.** IR spectrum of compound **3**

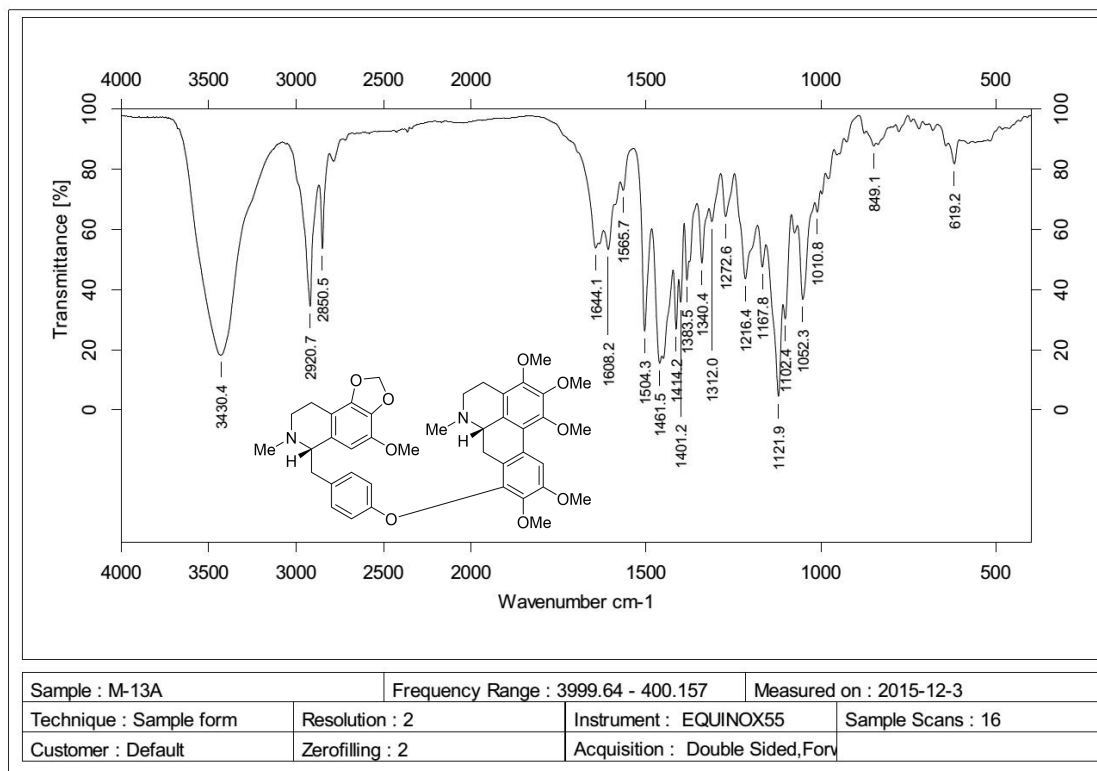

Figure S3.2. UV spectrum of compound 3

Spectrum Peak Pick Report

FIELD FIELD TEXT

Data Set: 没有

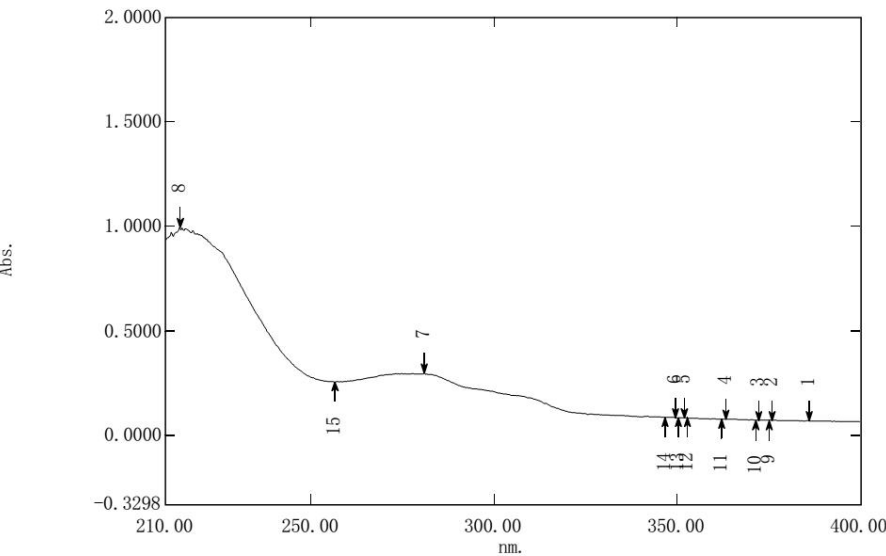

测定属性  
波长范围 (nm.): 200.00到400.00  
扫描速度: 高速  
采样间隔: 0.2  
自动采样间隔: 启用  
扫描模式: 自动

试样准备属性

重量:

体积:

稀释:

光程长:

附加信息:

仪器属性

仪器类型: UV-1700

测定方式: 吸收值

狭缝宽: 1.0 nm

光源改变波长: 340.8 nm

S/R 转换: 标准

附件属性

附件: 无

| No. | P/V | Wavelength | Abs.  | 描述 |
|-----|-----|------------|-------|----|
| 1   | +   | 386.00     | .0686 |    |
| 2   | +   | 375.80     | .0713 |    |
| 3   | +   | 372.20     | .0723 |    |
| 4   | +   | 363.20     | .0765 |    |
| 5   | +   | 352.00     | .0834 |    |
| 6   | +   | 349.40     | .0850 |    |
| 7   | +   | 280.80     | .2975 |    |
| 8   | +   | 214.00     | .9934 |    |
| 9   | +   | 375.00     | .0703 |    |
| 10  | +   | 371.40     | .0713 |    |
| 11  | +   | 362.00     | .0754 |    |
| 12  | +   | 352.80     | .0811 |    |
| 13  | +   | 350.20     | .0817 |    |
| 14  | +   | 346.60     | .0850 |    |
| 15  | +   | 256.40     | .2544 |    |
| 16  | +   | 204.80     | .8706 |    |

FIELD TEXT



**Figure S3.3.**  $^1\text{H}$  NMR (600 MHz,  $\text{CDCl}_3$ ) spectrum of compound **3**

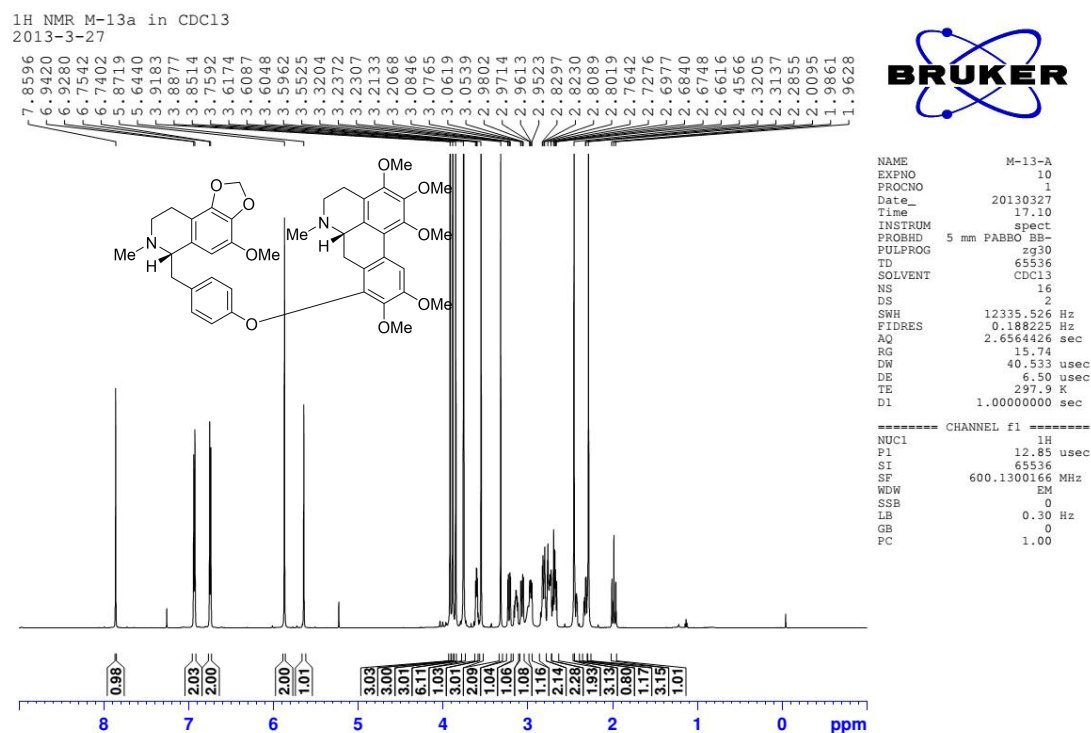

**Figure S3.4.**  $^{13}\text{C}$  NMR (150 MHz,  $\text{CDCl}_3$ ) spectrum of compound **3**

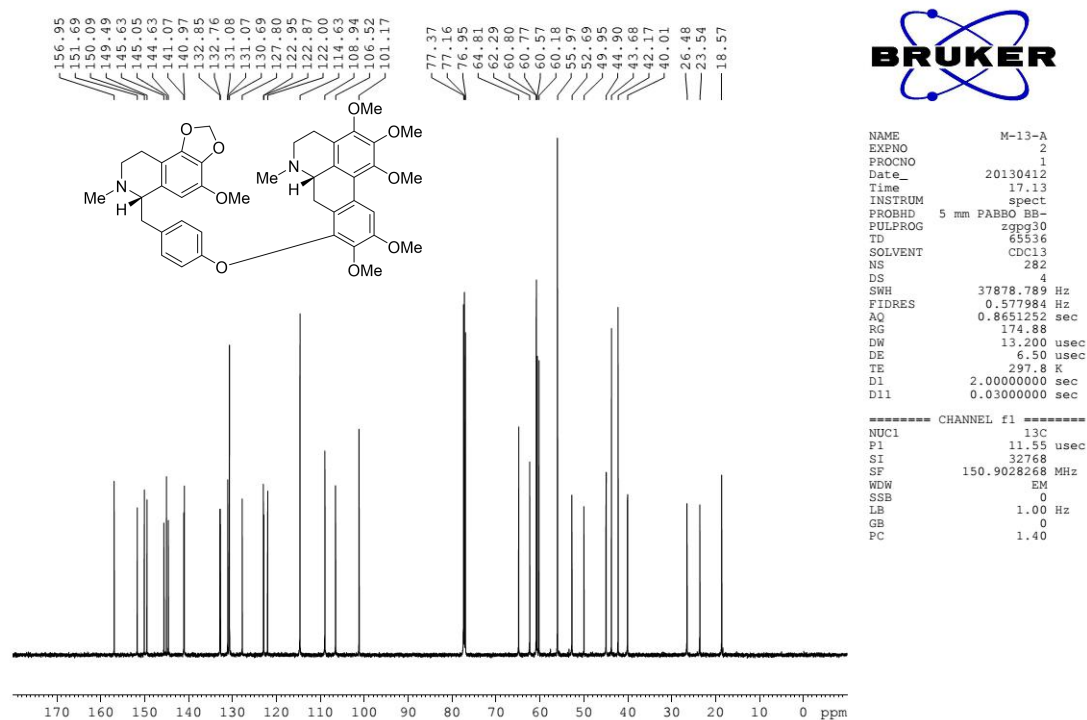

**Figure S3.5.** HSQC (600 MHz, CDCl<sub>3</sub>) spectrum of compound **3**

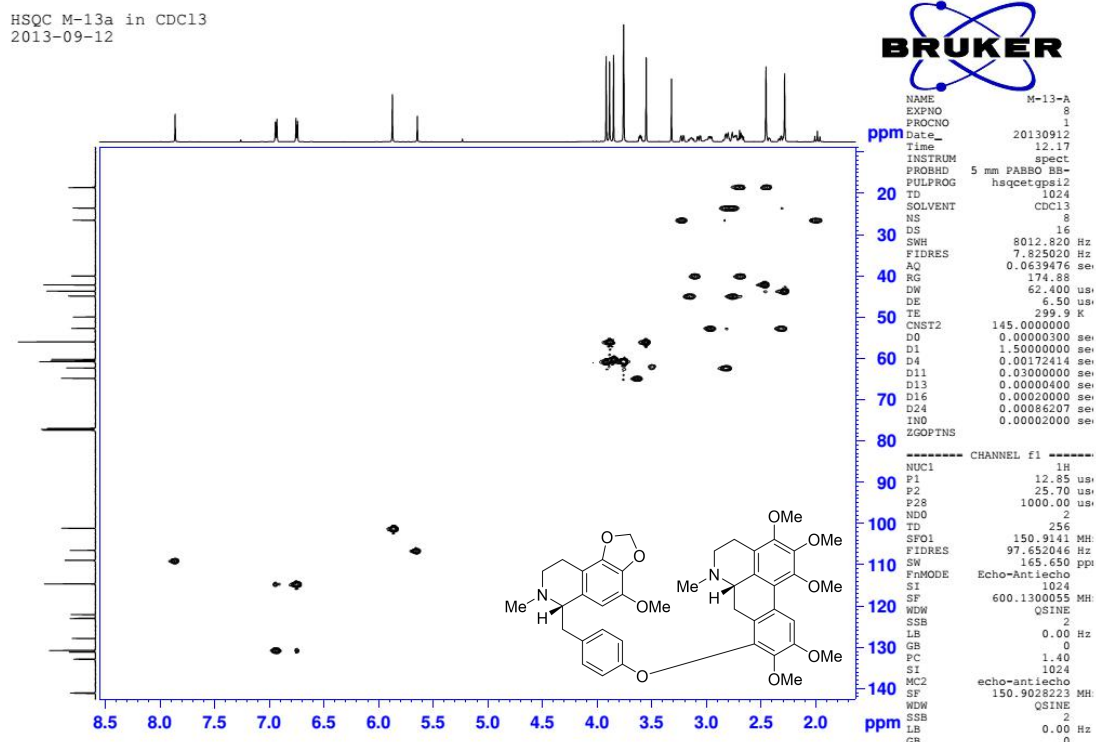

**Figure S3.6.** HMBC (600 MHz, CDCl<sub>3</sub>) spectrum of compound **3**

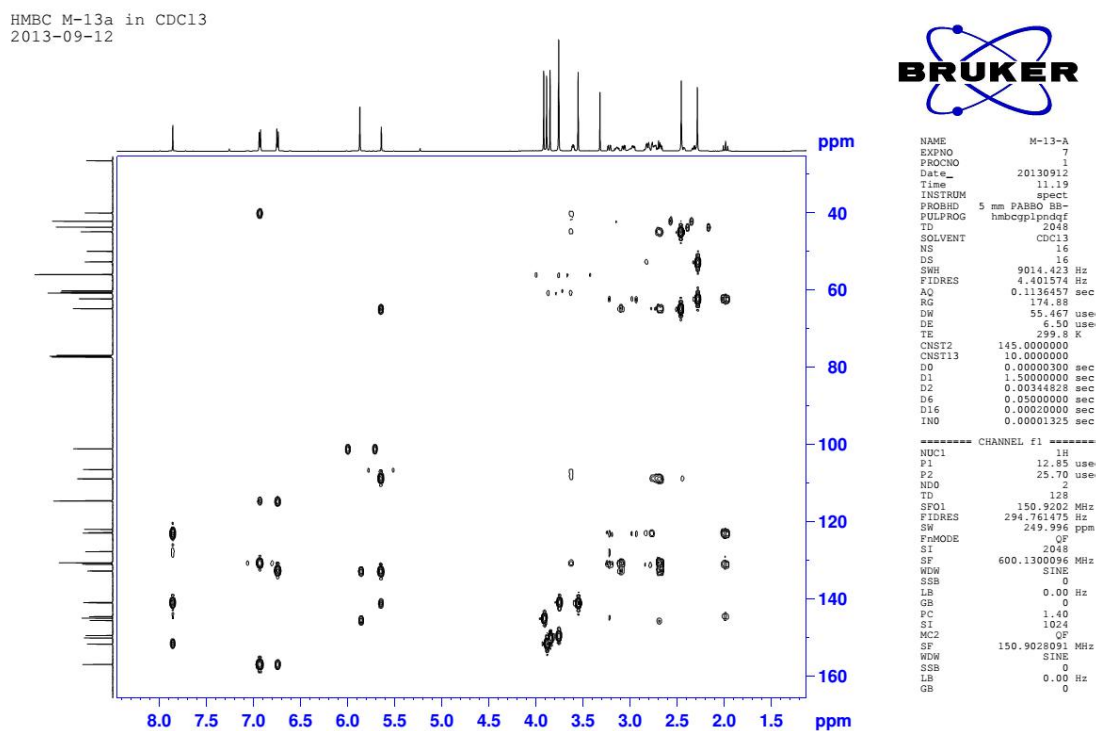

**Figure S3.7.** NOESY (600 MHz, CDCl<sub>3</sub>) spectrum of compound **3**

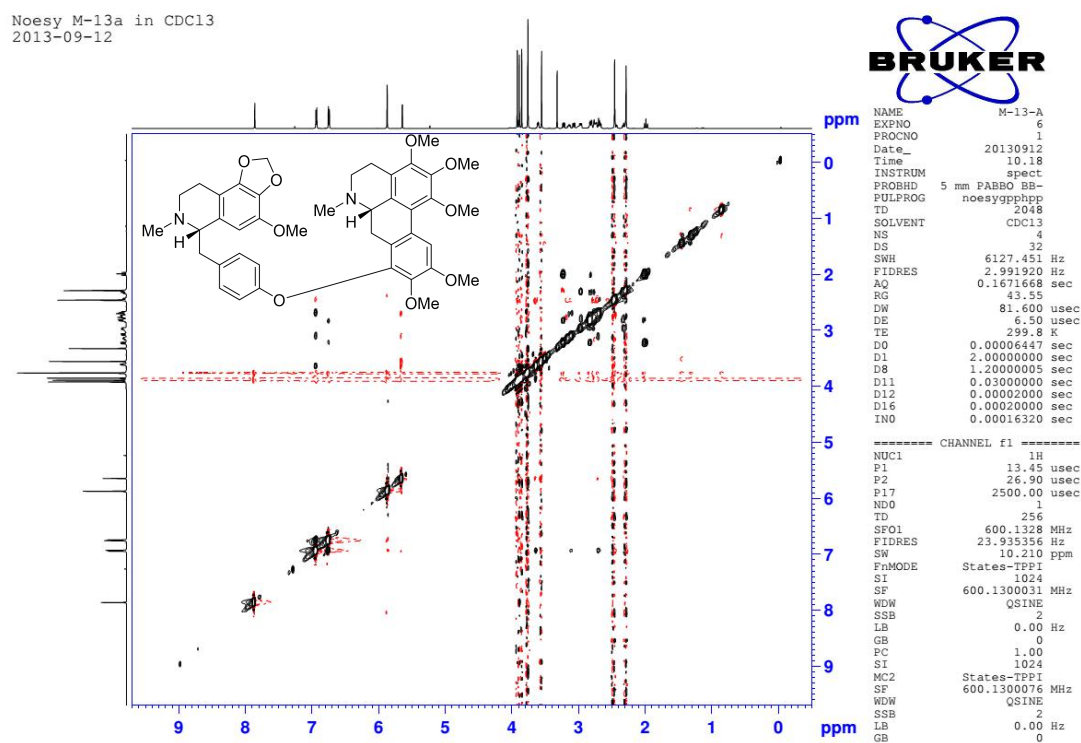

**Figure S3.8.** HRESIMS of compound **3**

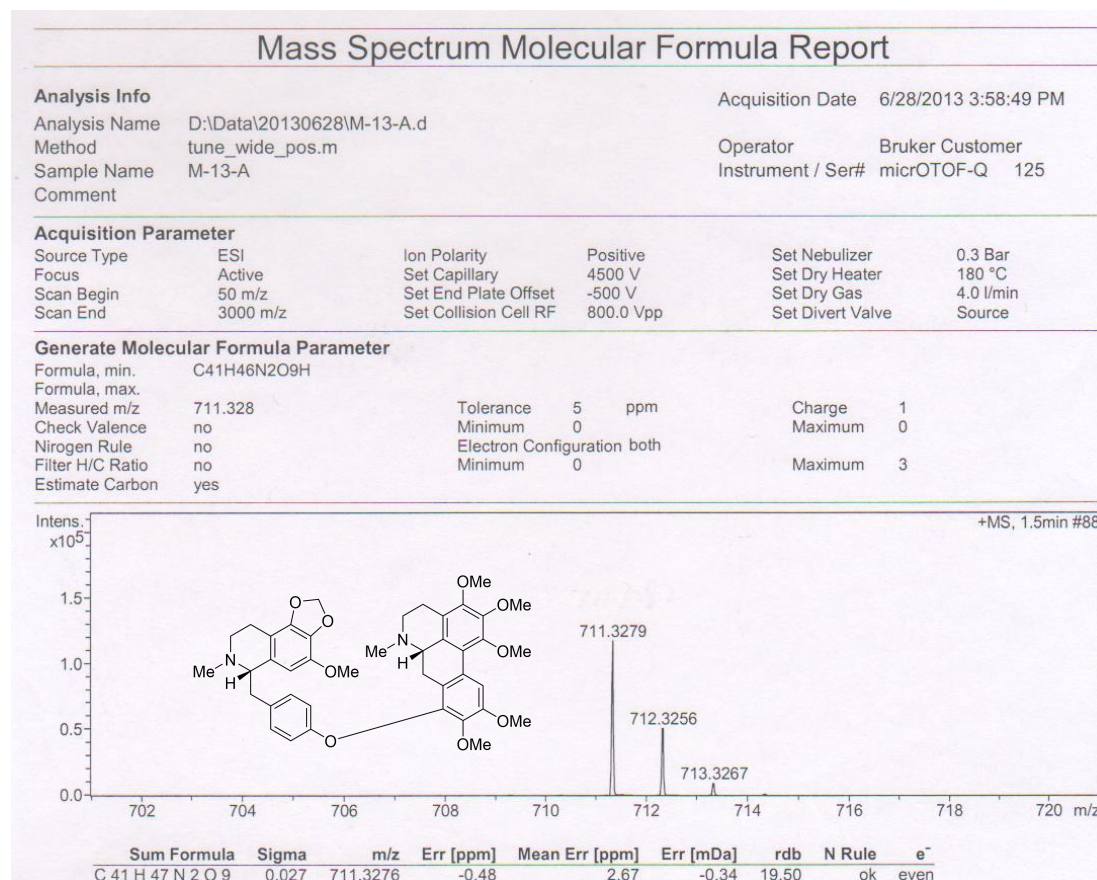

**Figure S3.9.** ECD spectrum of compound **3**

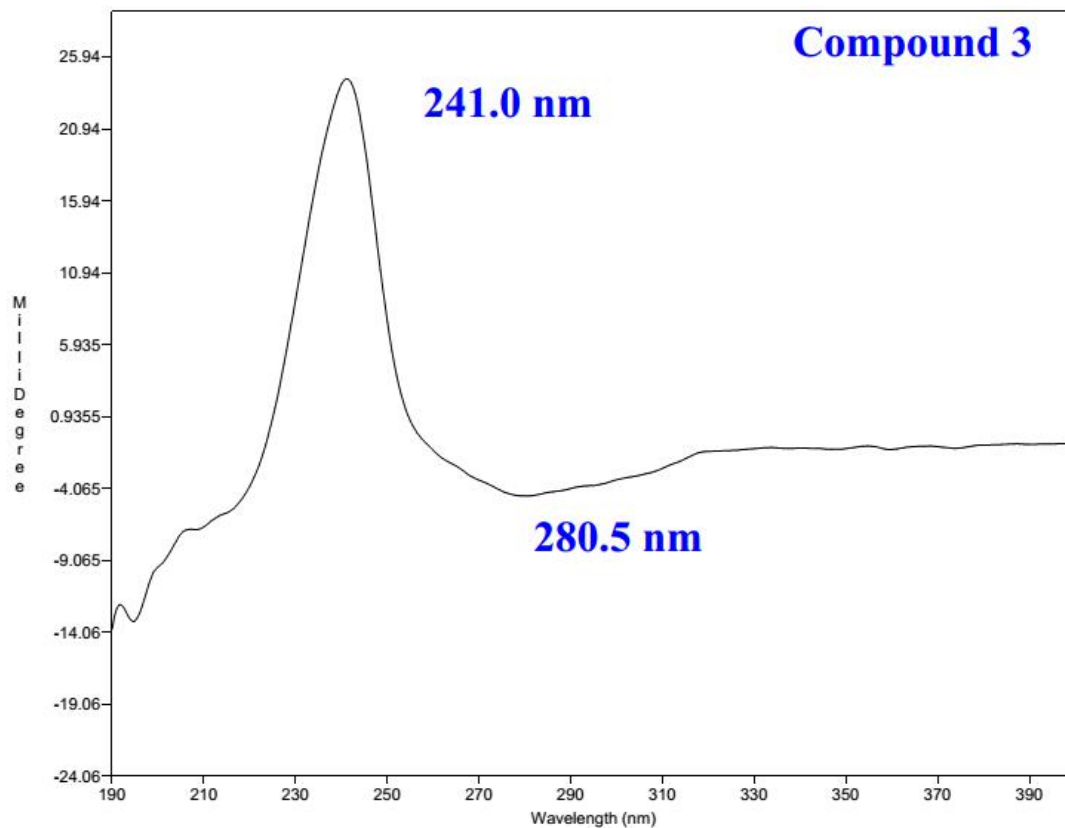

Bio-Kine Software V4.71 Date : 2014-3-7 Time : 13:25:08

**COMMENTS :**

File name : sav-golay  
Savitzky-Golay Smooth of sav-golay  
Window Points=15  
Polynomial Order=3  
Derivative=0

**Figure S3.10.** Key HMBC correlations of compound **3**

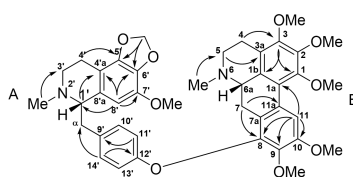

**Figure S3.11.** Key NOESY correlations of compound **3**

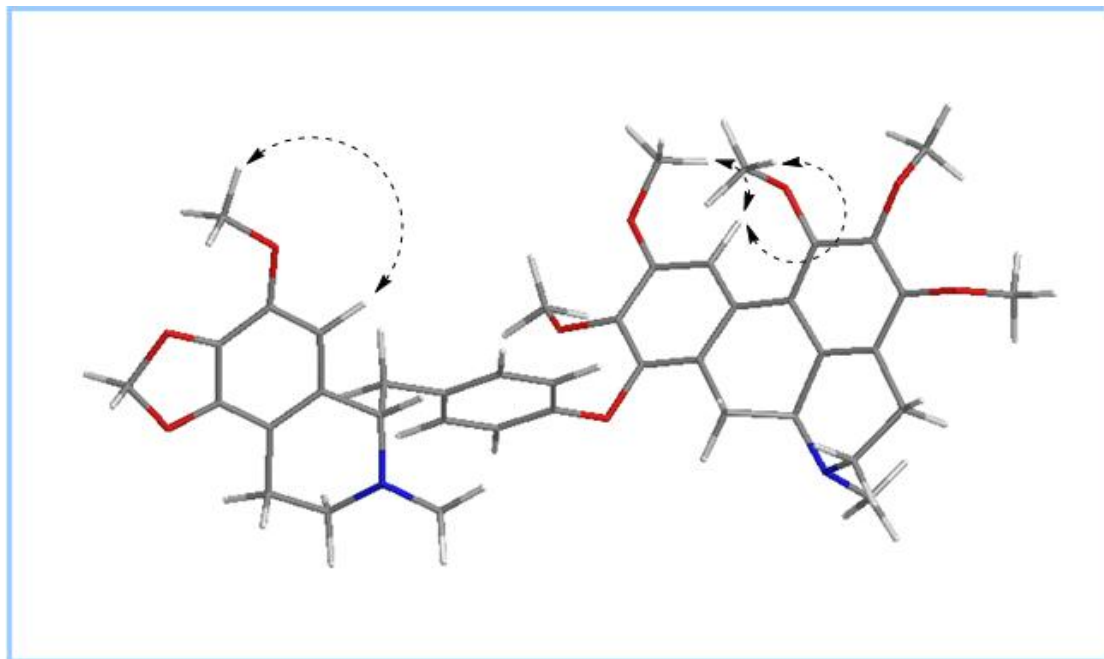

**Figure S4.1.** IR spectrum of compound 7

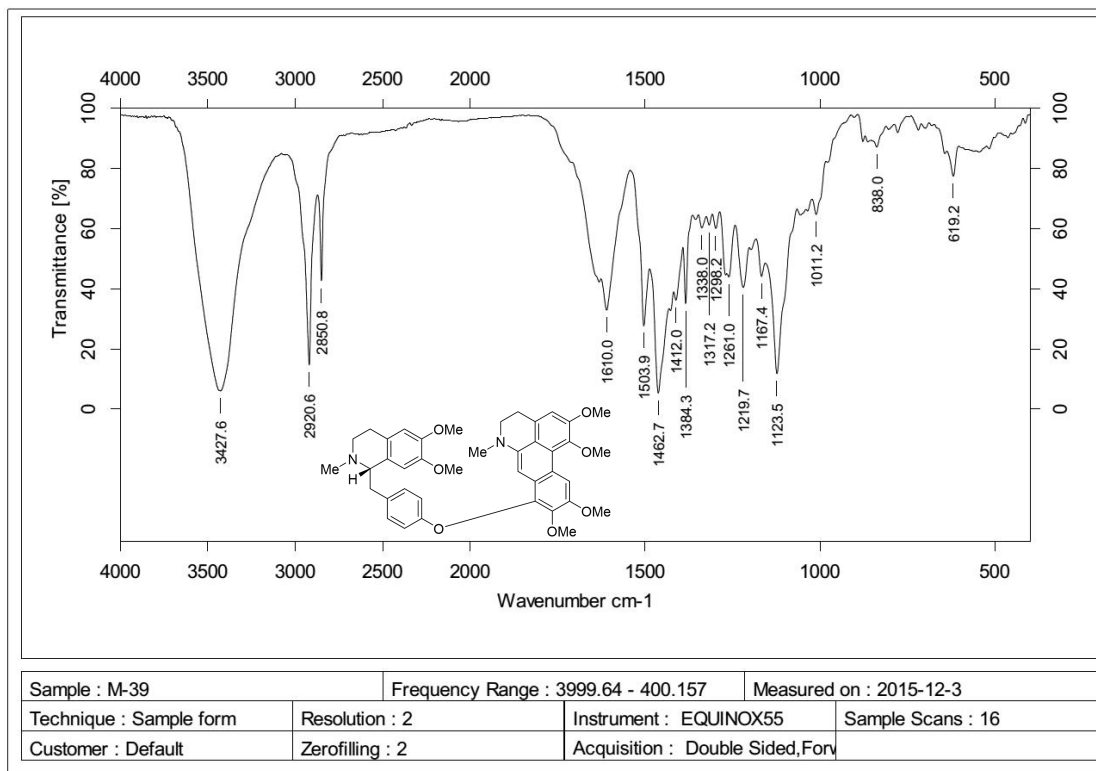

Figure S4.2. UV spectrum of compound 7

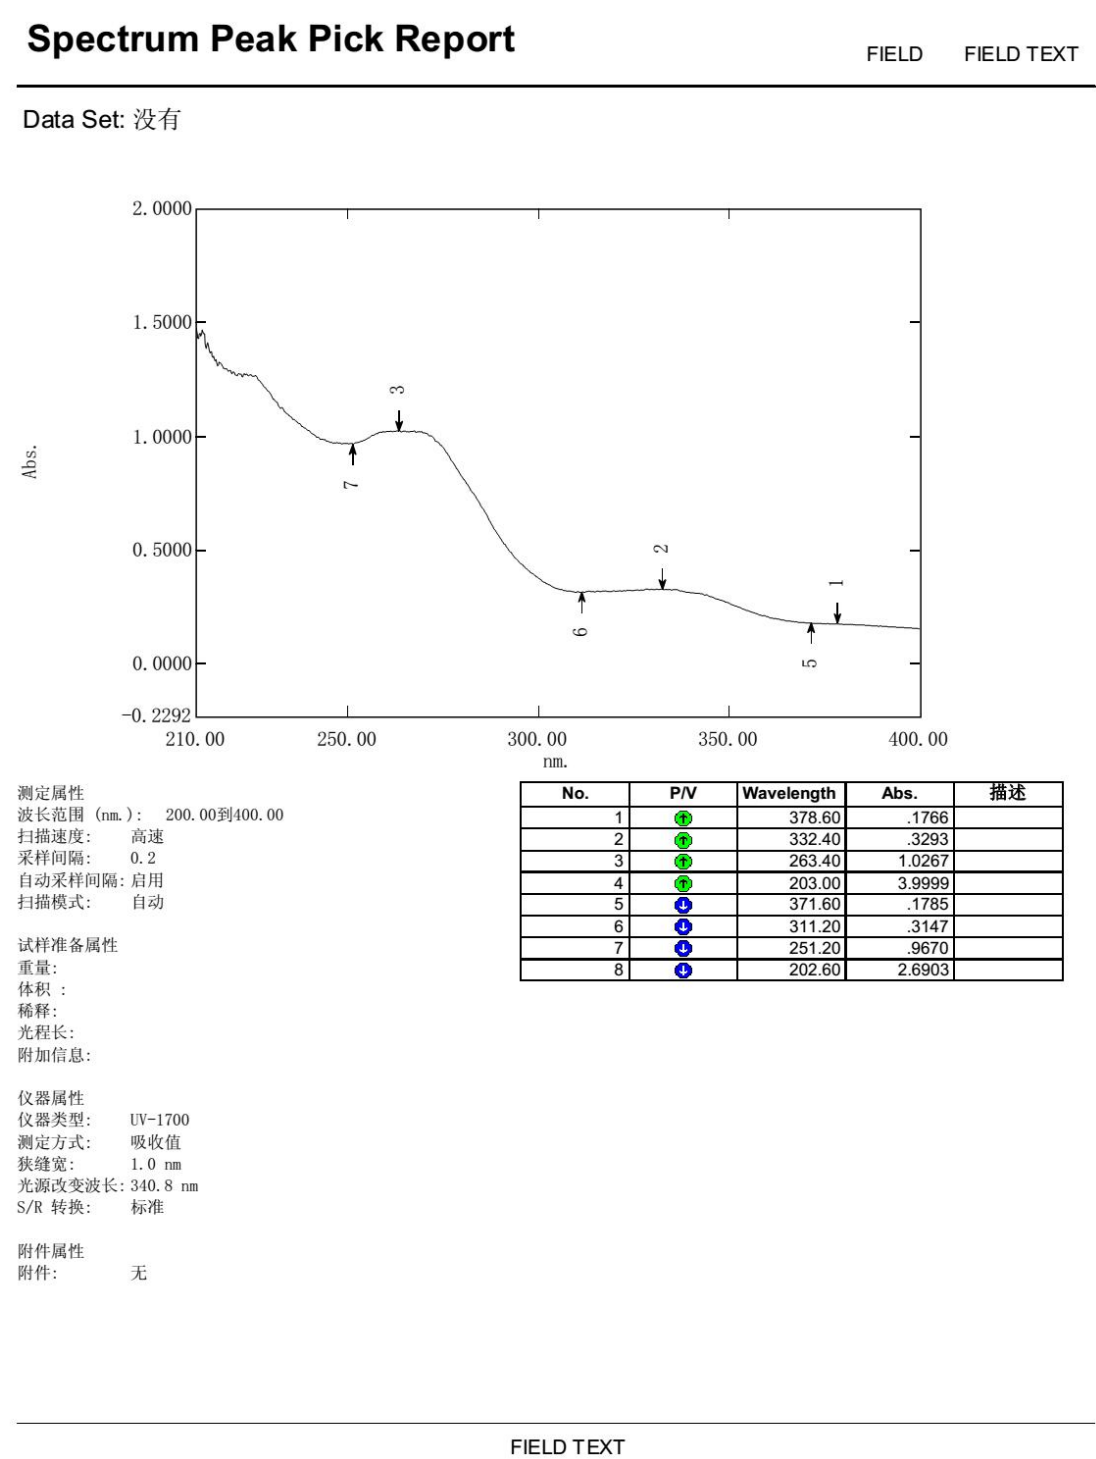



Figure S4.3.  $^1\text{H}$  NMR (600 MHz,  $\text{CDCl}_3$ ) spectrum of compound 7

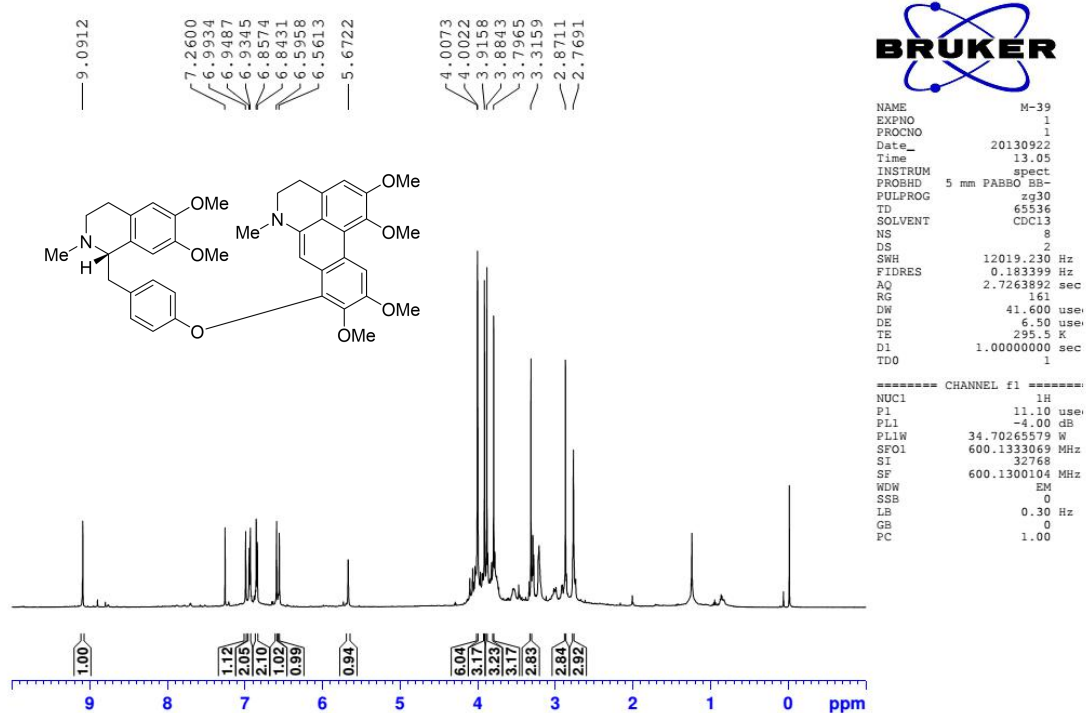

Figure S4.4.  $^{13}\text{C}$  NMR (150 MHz,  $\text{CDCl}_3$ ) spectrum of compound 7

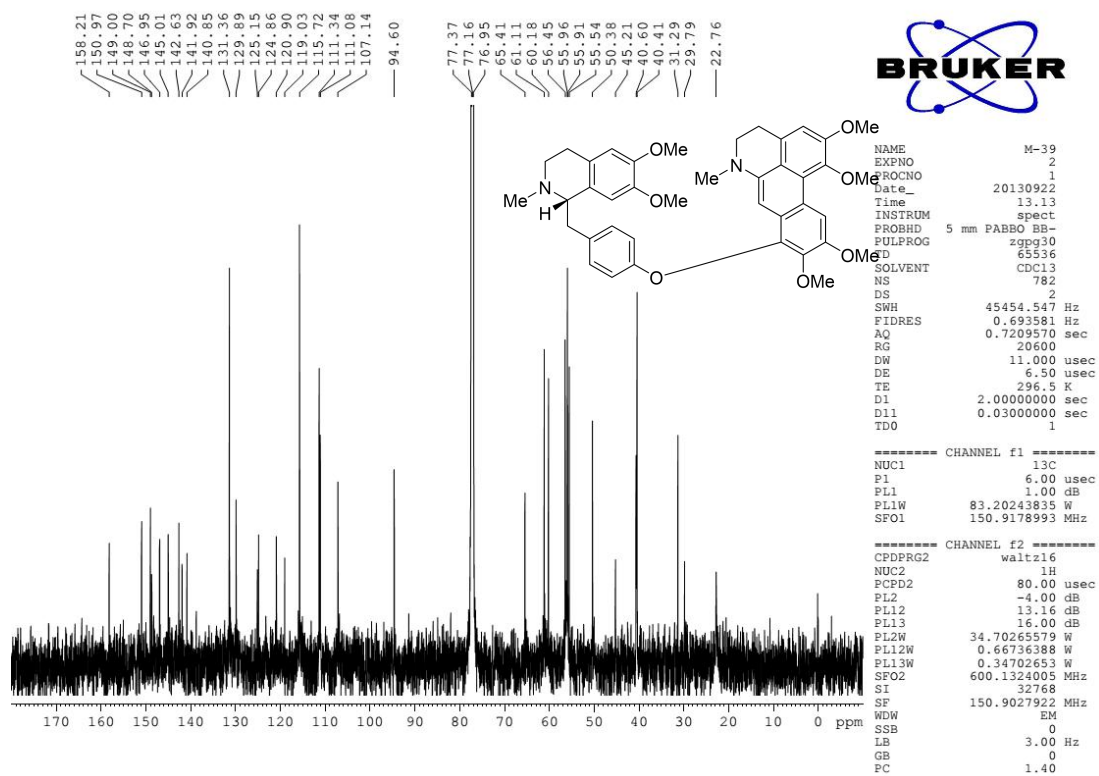

Figure S4.5. HSQC (600 MHz, CDCl<sub>3</sub>) spectrum of compound 7

AV-600-HSQC  
Sample:M-39

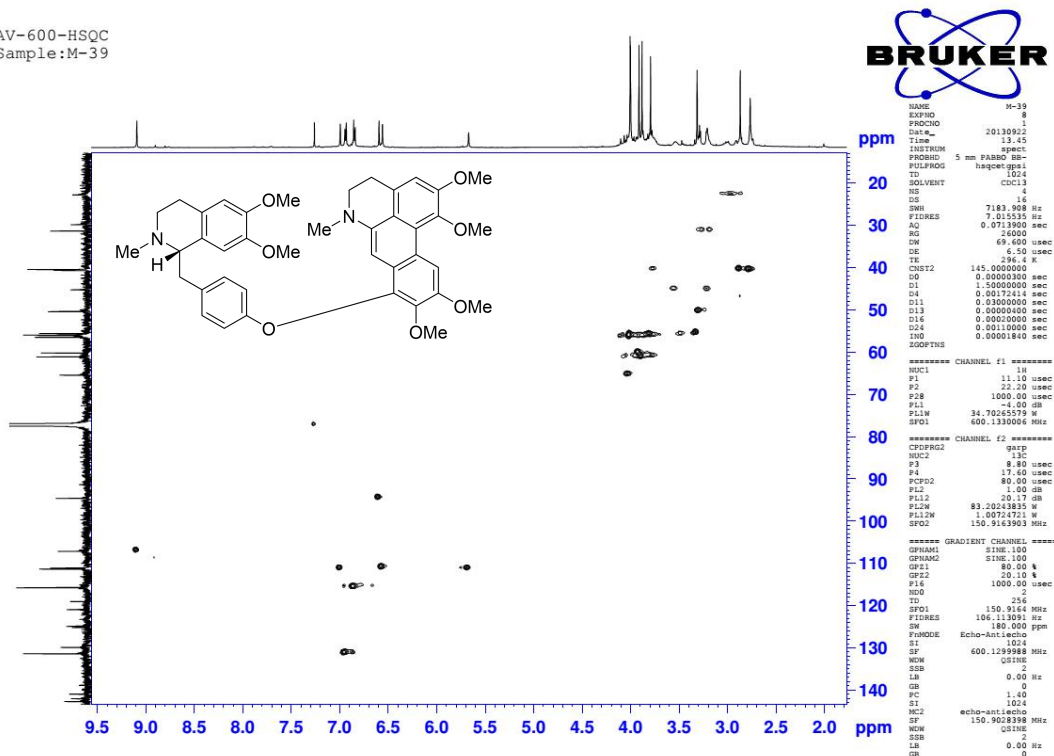

Figure S4.6. HMBC (600 MHz, CDCl<sub>3</sub>) spectrum of compound 7

AV-600-HMBC  
Sample:

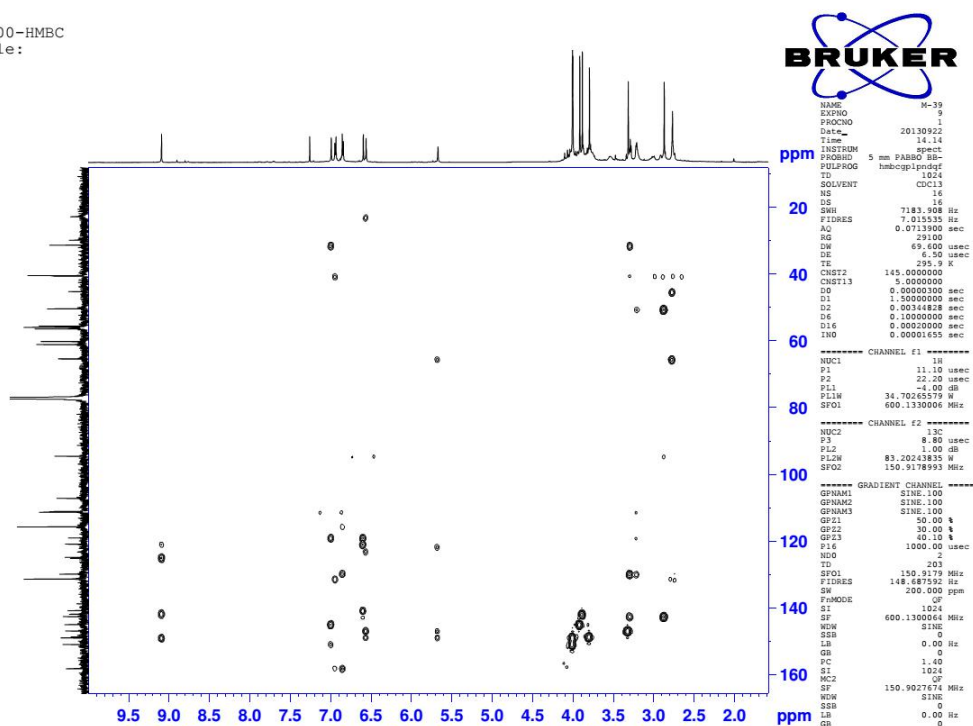

**Figure S4.7.** HRESIMS of compound 7

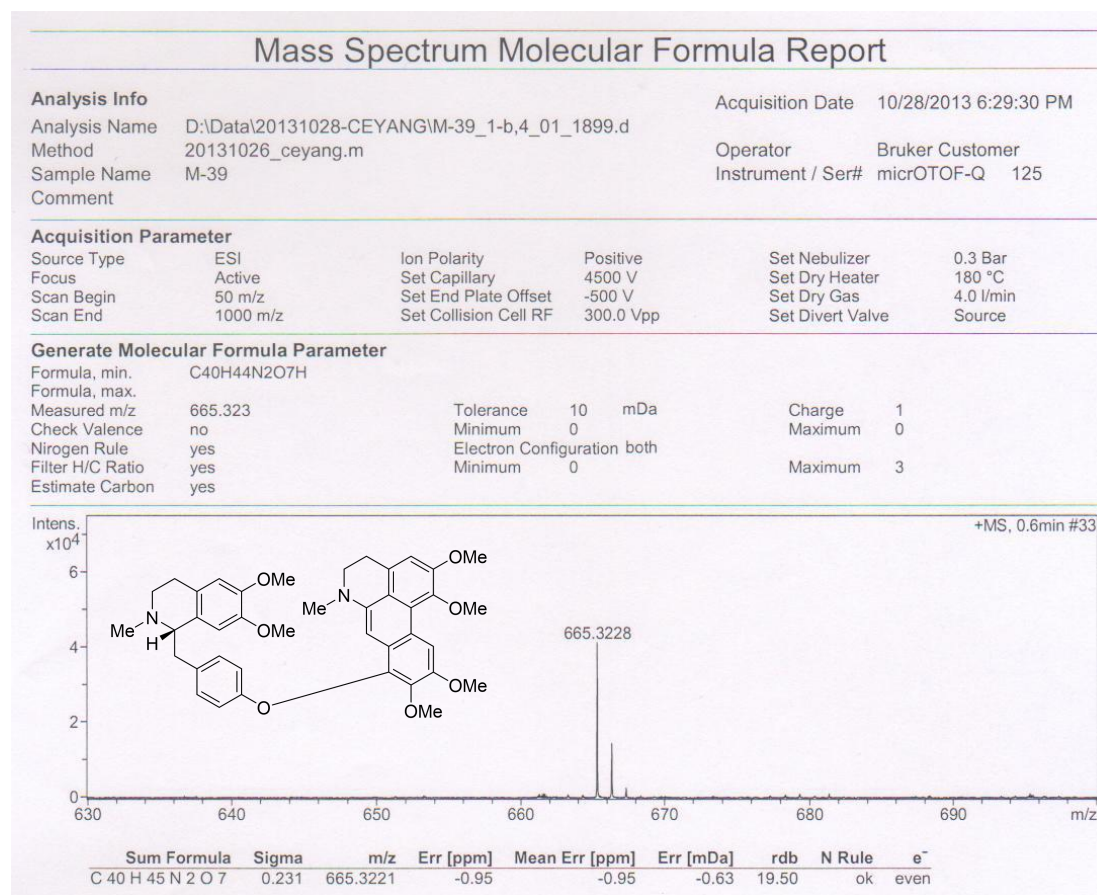

**Figure S4.8.** ECD spectrum of compound 7

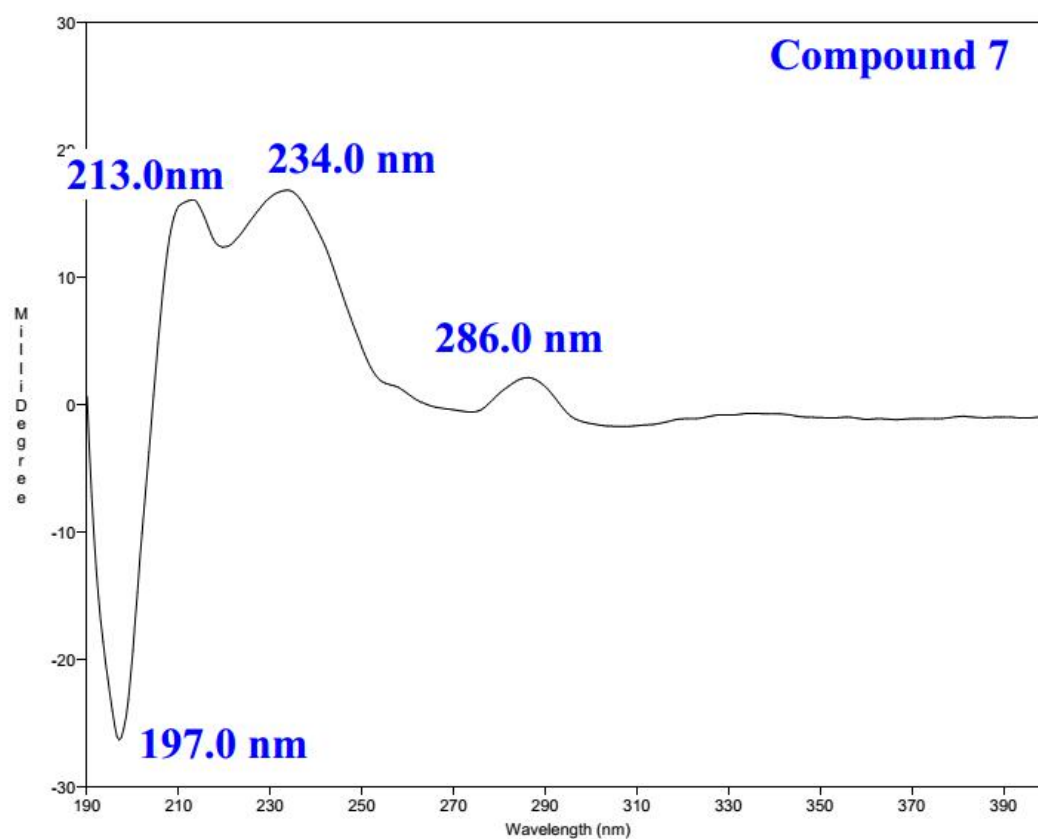

Bio-Kine Software V4.71 Date : 2014-3-7 Time : 14:28:30

**COMMENTS :**

File name : sav-golay  
Savitzky-Golay Smooth of sav-golay  
Window Points=15  
Polynomial Order=3  
Derivative=0

**Figure S5.1.** IR spectrum of compound **8**

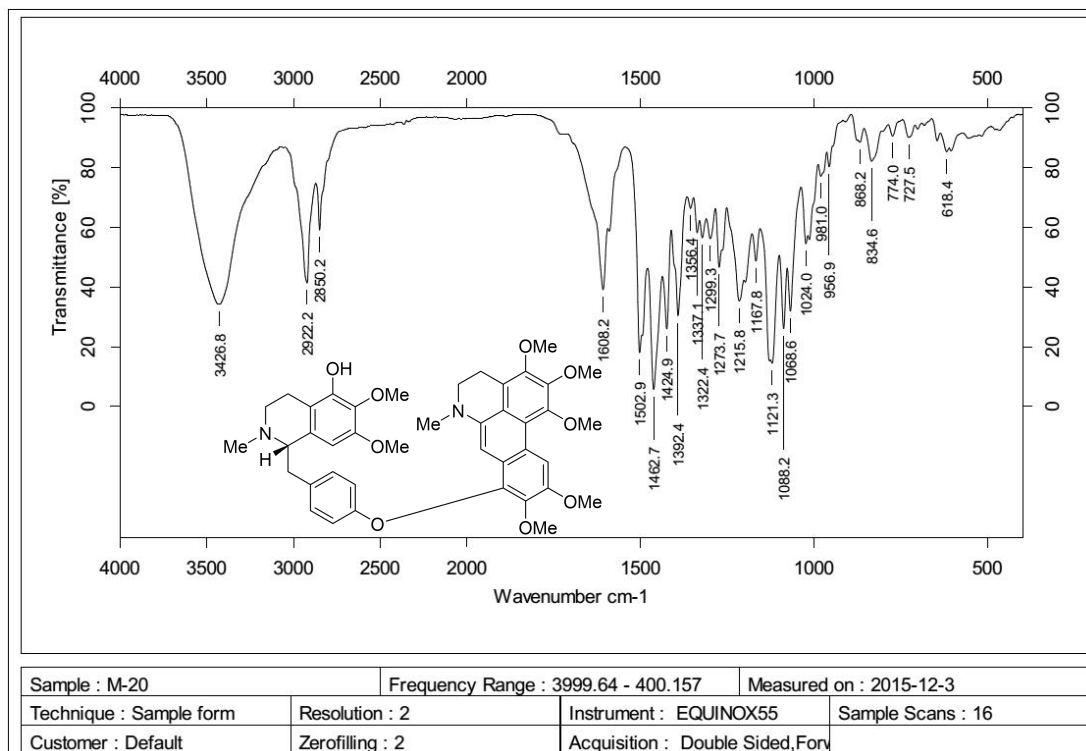

Figure S5.2. UV spectrum of compound 8

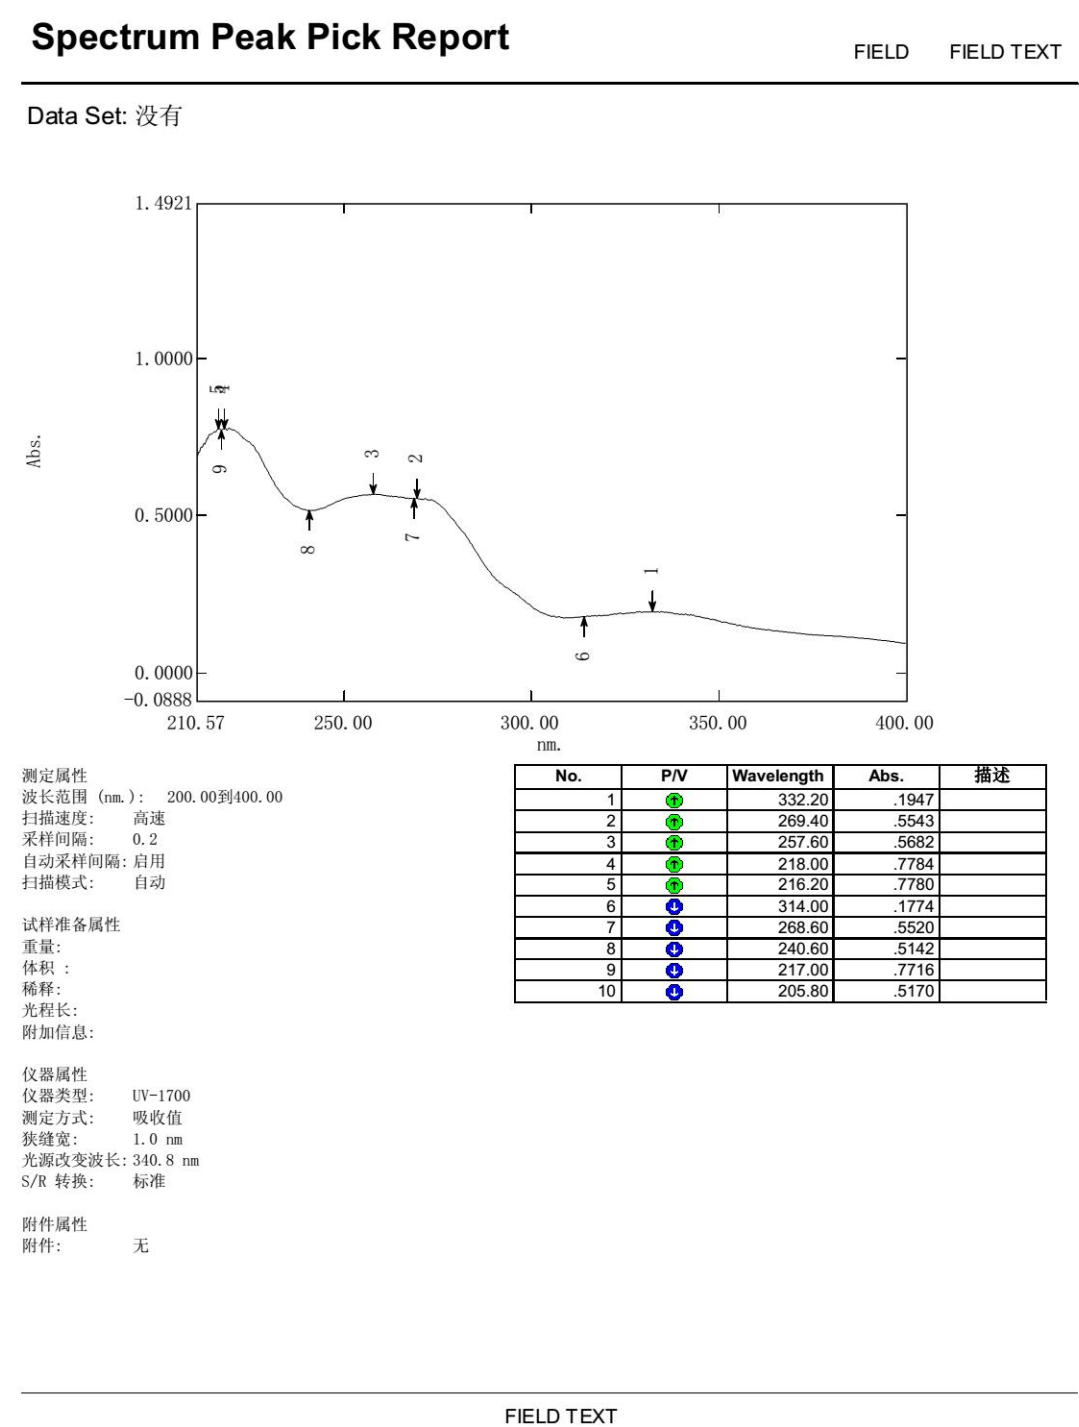

**Figure S5.3.**  $^1\text{H}$  NMR (600 MHz,  $\text{CDCl}_3$ ) spectrum of compound **8**

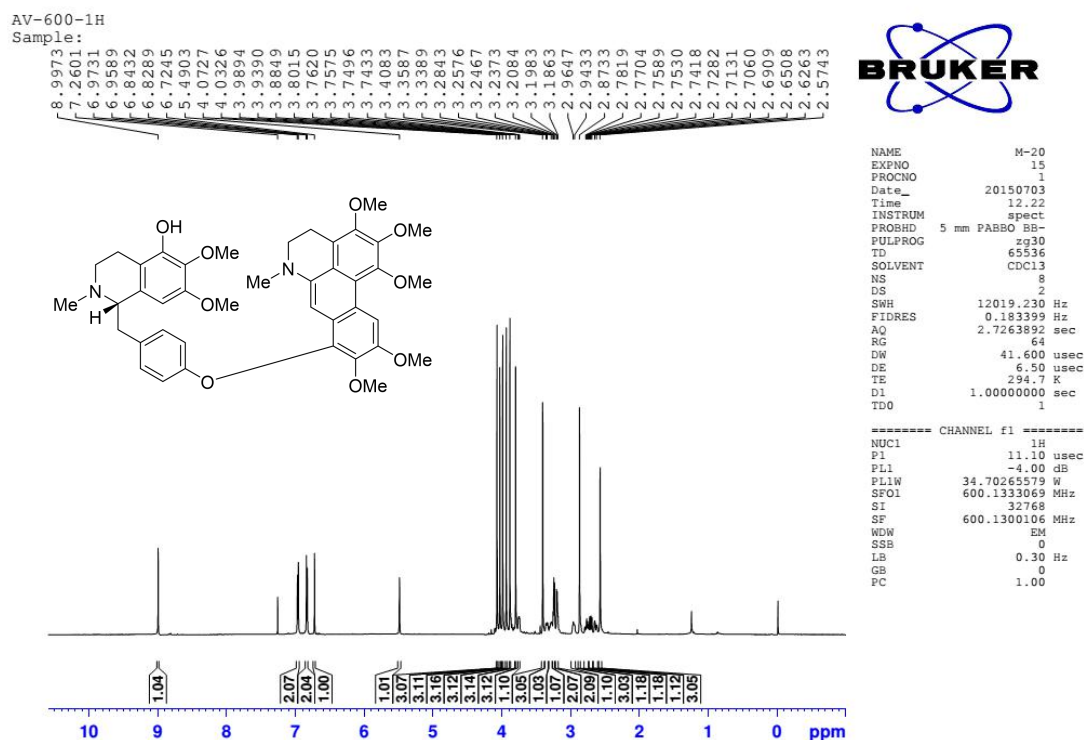

**Figure S5.4.**  $^{13}\text{C}$  NMR (150 MHz,  $\text{CDCl}_3$ ) spectrum of compound **8**

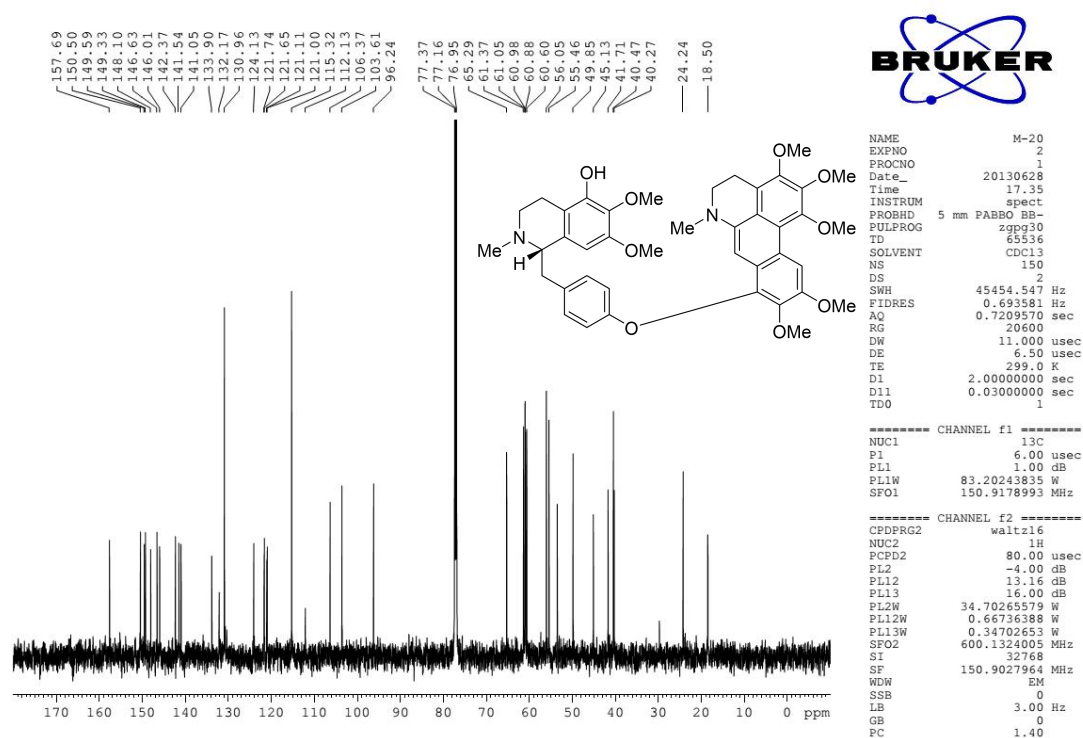



**Figure S5.5.** HSQC (600 MHz, CDCl<sub>3</sub>) spectrum of compound **8**

AV-600-HSQC  
Sample:

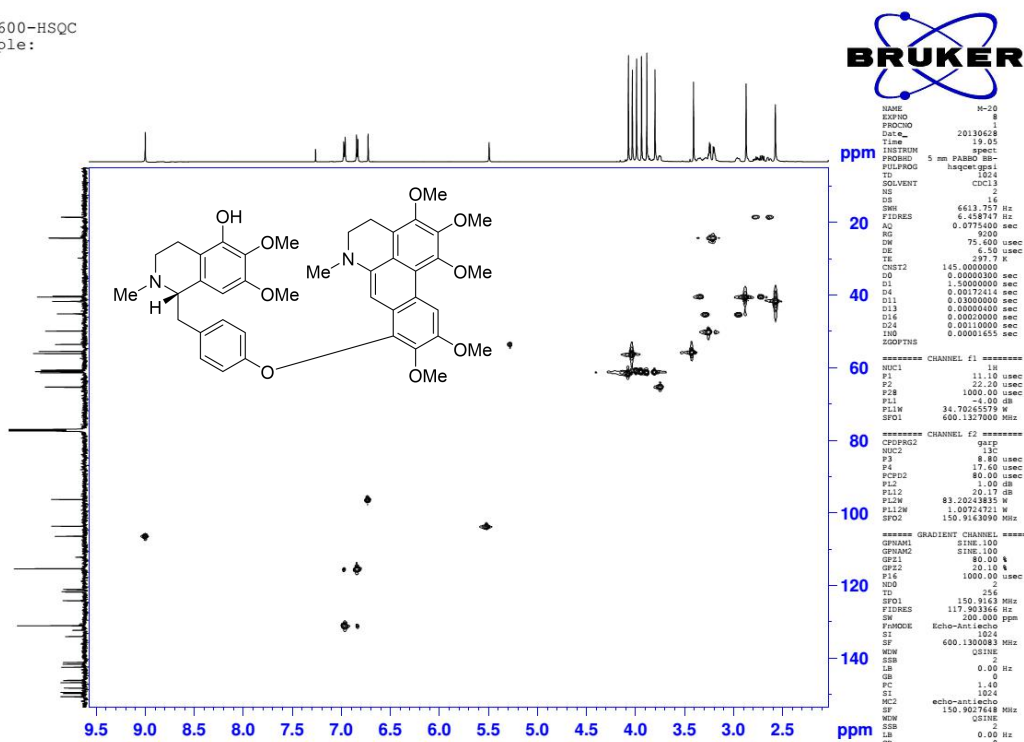

**Figure S5.6.** HMBC (600 MHz, CDCl<sub>3</sub>) spectrum of compound **8**

AV-600-HMBC  
Sample:

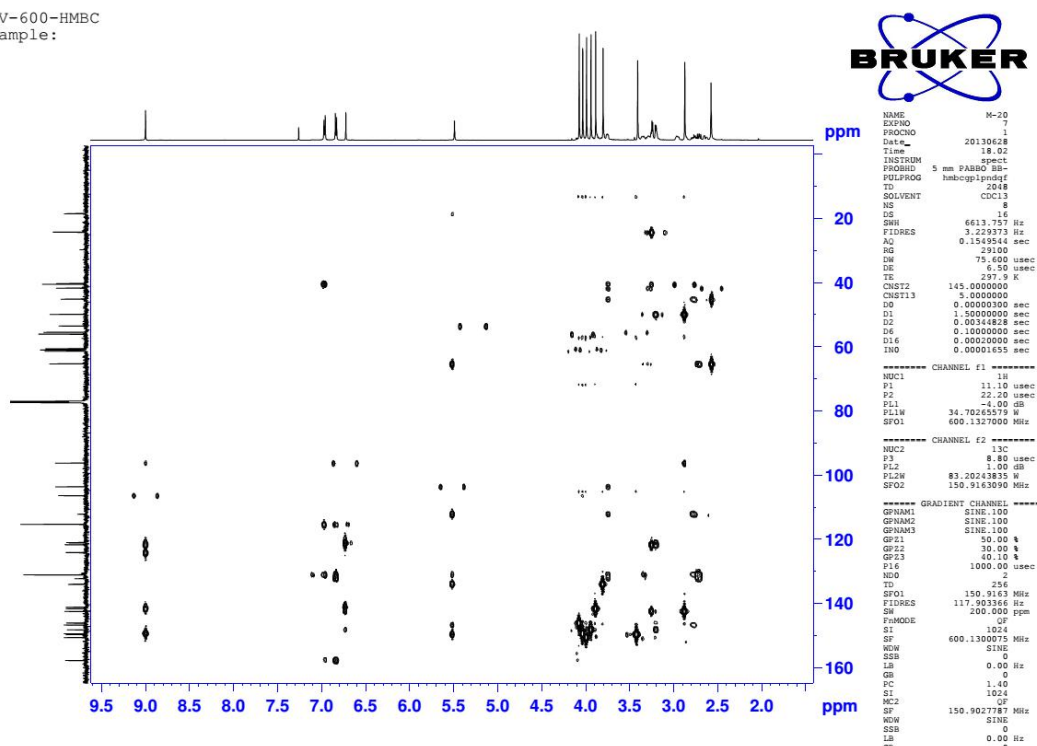



**Figure S5.7.** NOESY (600 MHz, CDCl<sub>3</sub>) spectrum of compound **8**

AV-600-NOESY  
Sample:

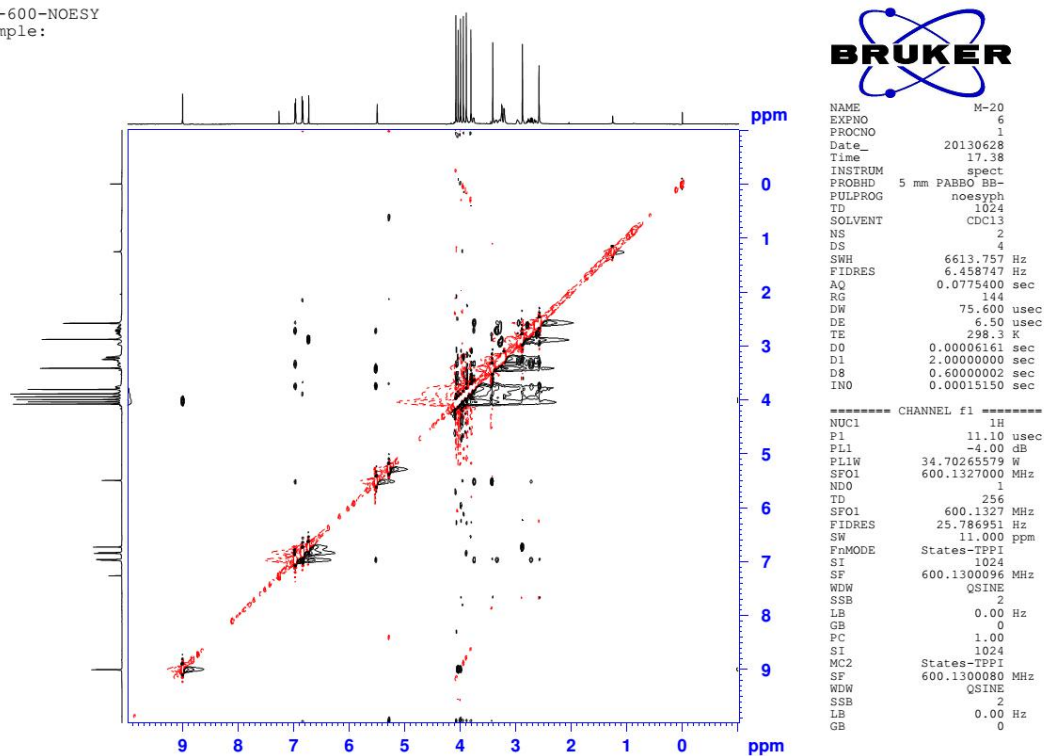

**Figure S5.8.** HRESIMS of compound **8**

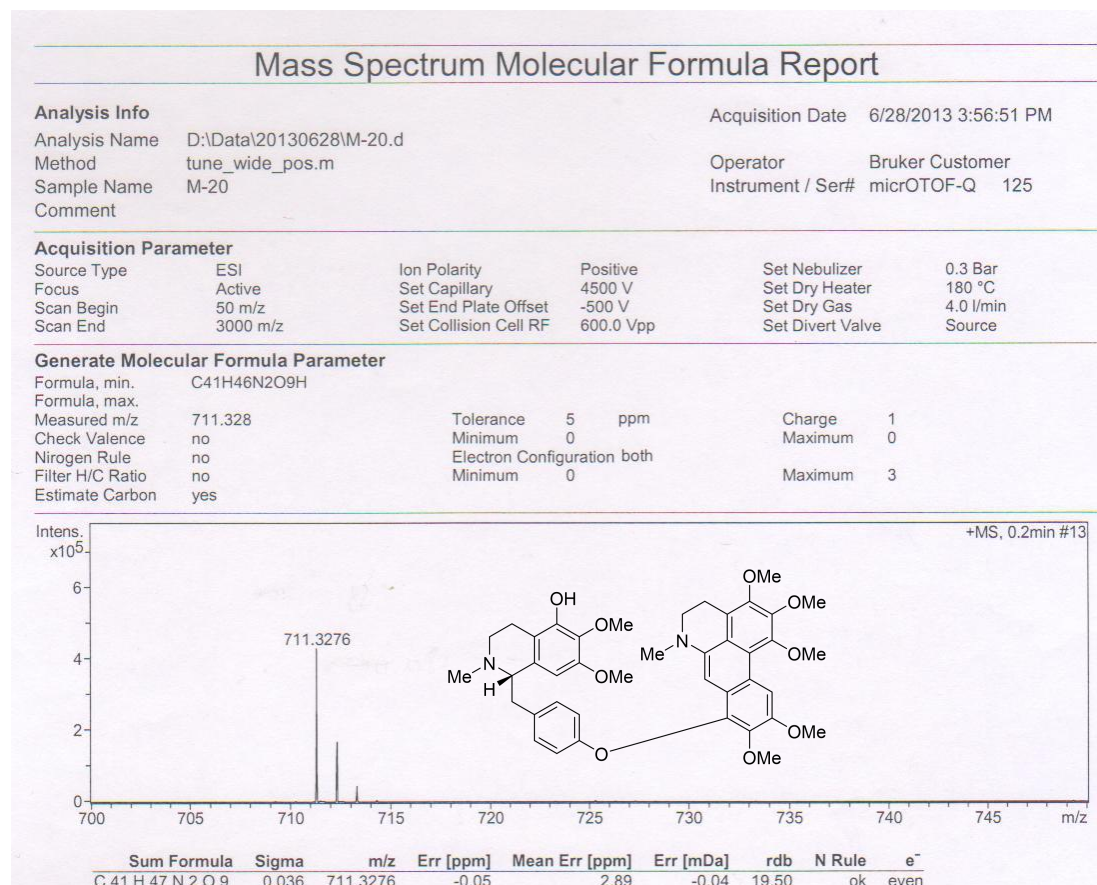

**Figure S5.9.** ECD spectrum of compound **8**

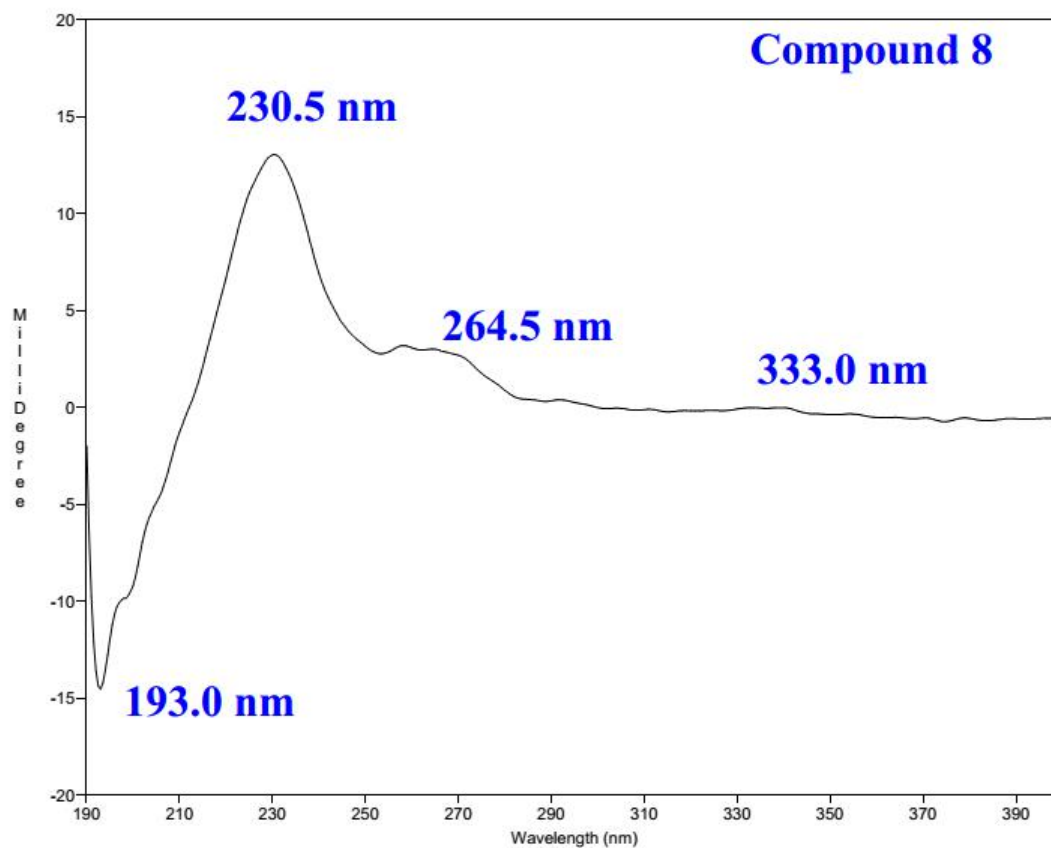

Bio-Kine Software V4.71 Date : 2014-3-7 Time : 13:48:40

**COMMENTS :**

File name : sav-golay  
Savitzky-Golay Smooth of sav-golay  
Window Points=15  
Polynomial Order=3  
Derivative=0

**Figure S5.10.** Key HMBC correlations of compound **8**

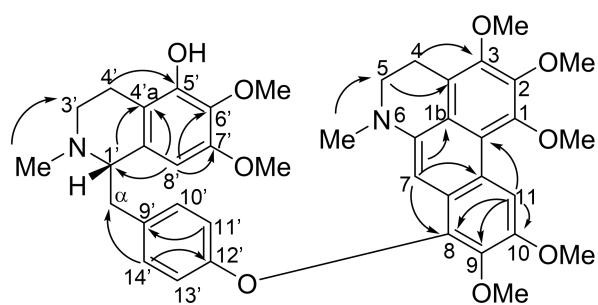

**Figure S5.11.** Key NOESY correlations of compound **8**

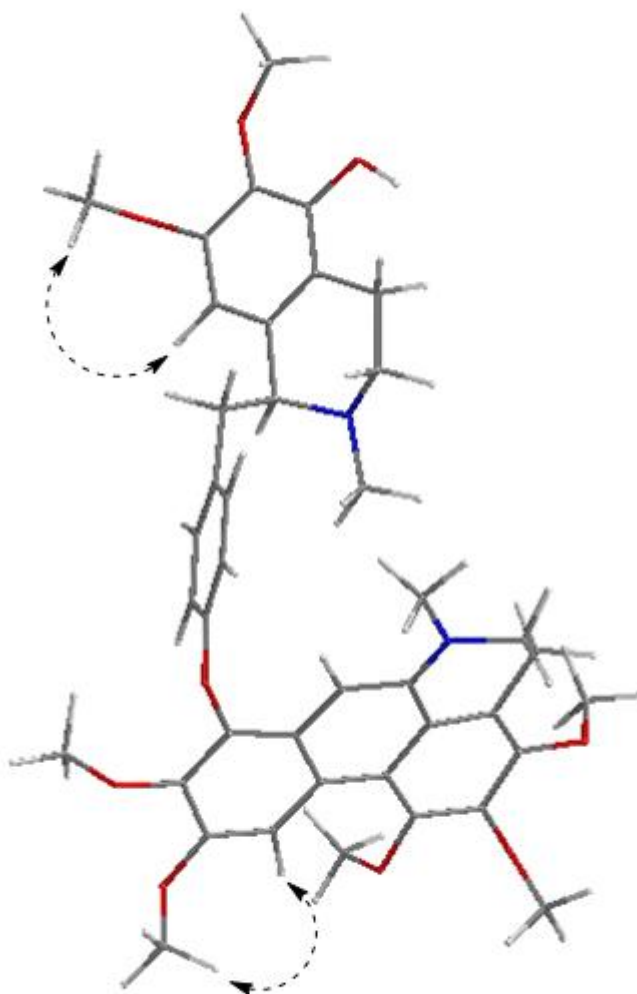

**Figure S6.1.** IR spectrum of compound **9**

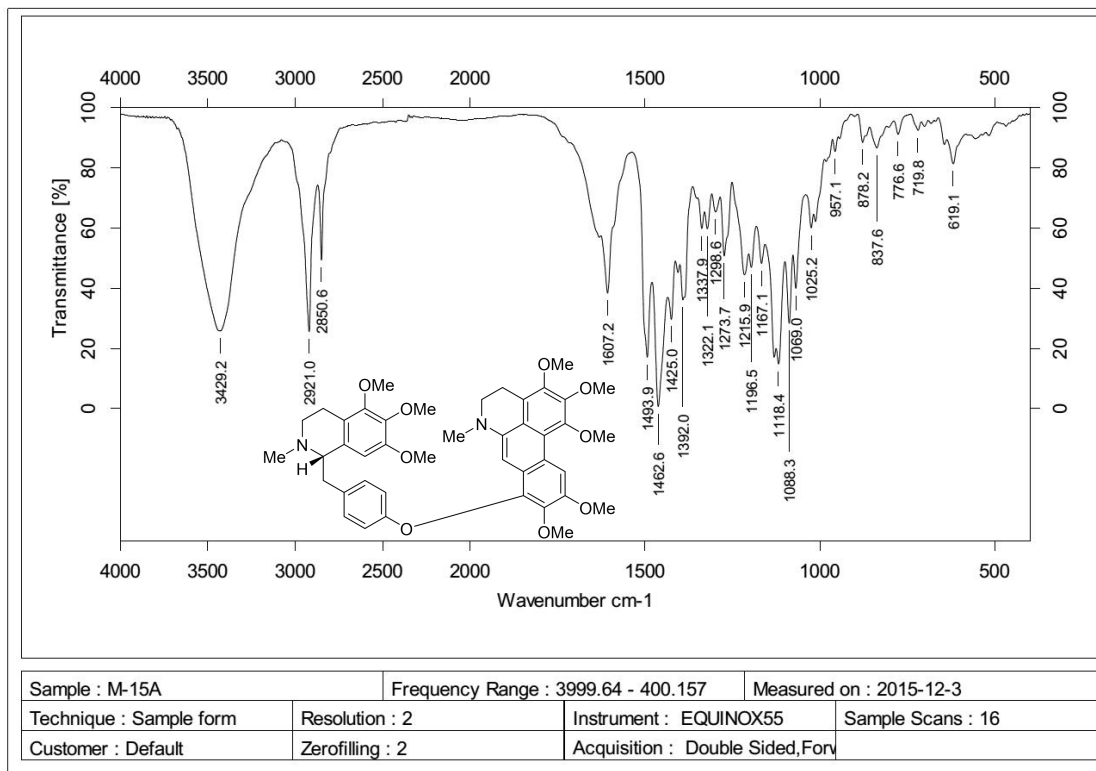

Figure S6.2. UV spectrum of compound 9

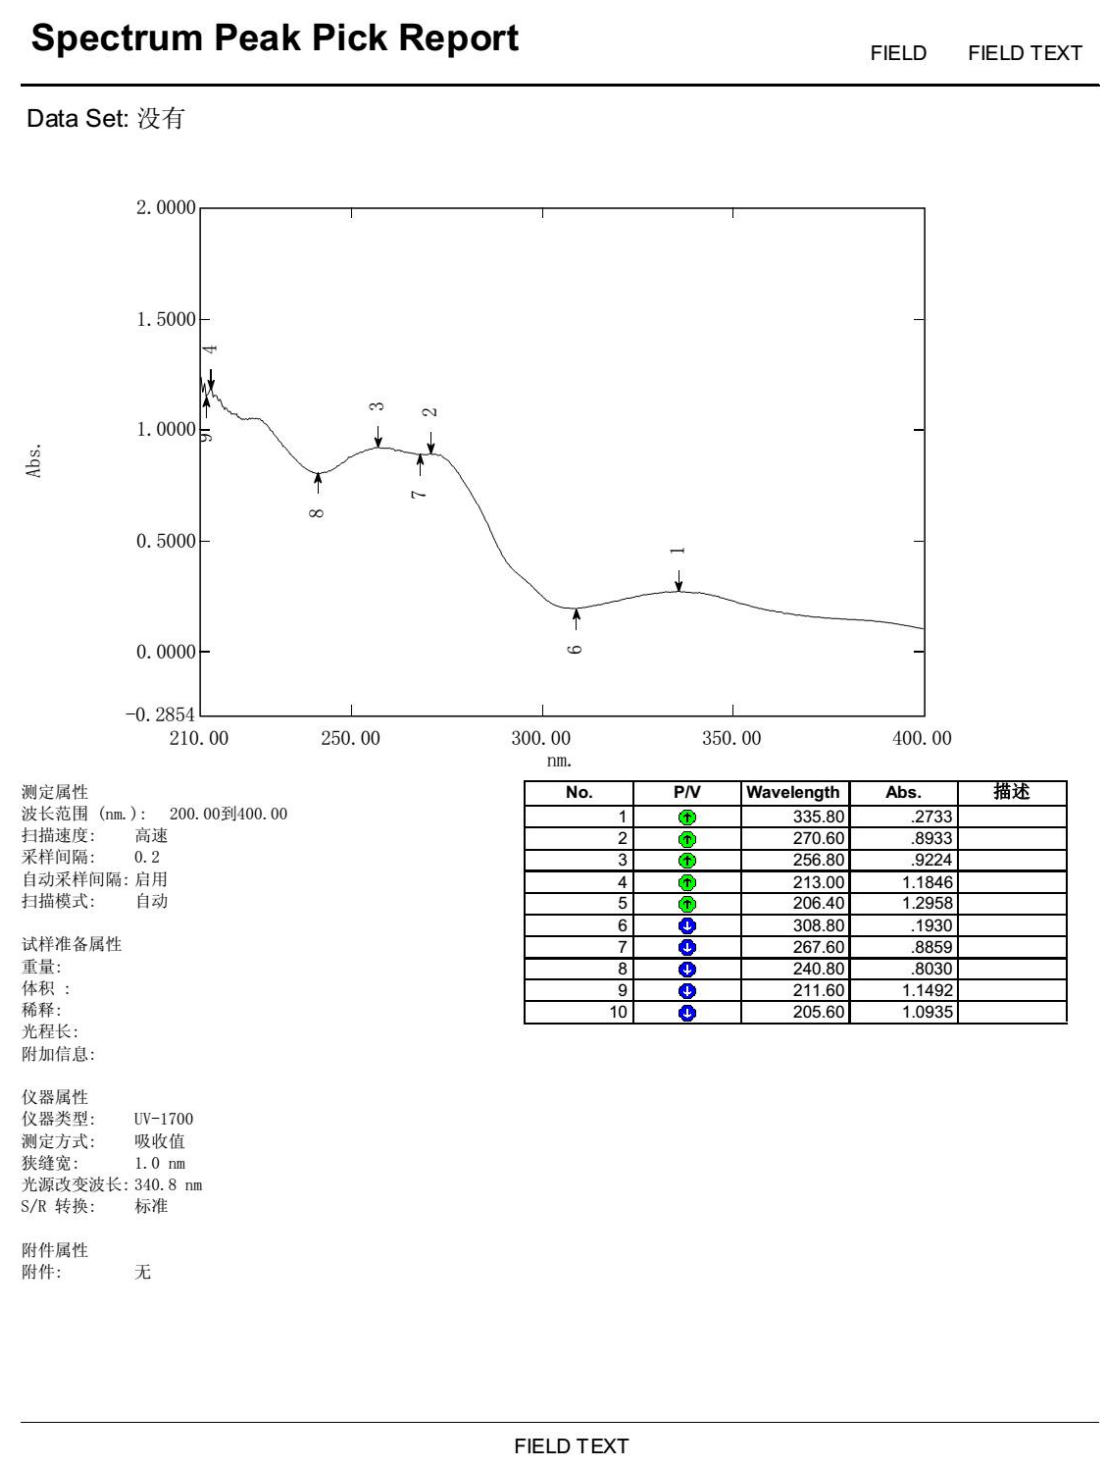

**Figure S6.3.**  $^1\text{H}$  NMR (600 MHz,  $\text{CDCl}_3$ ) spectrum of compound **9**

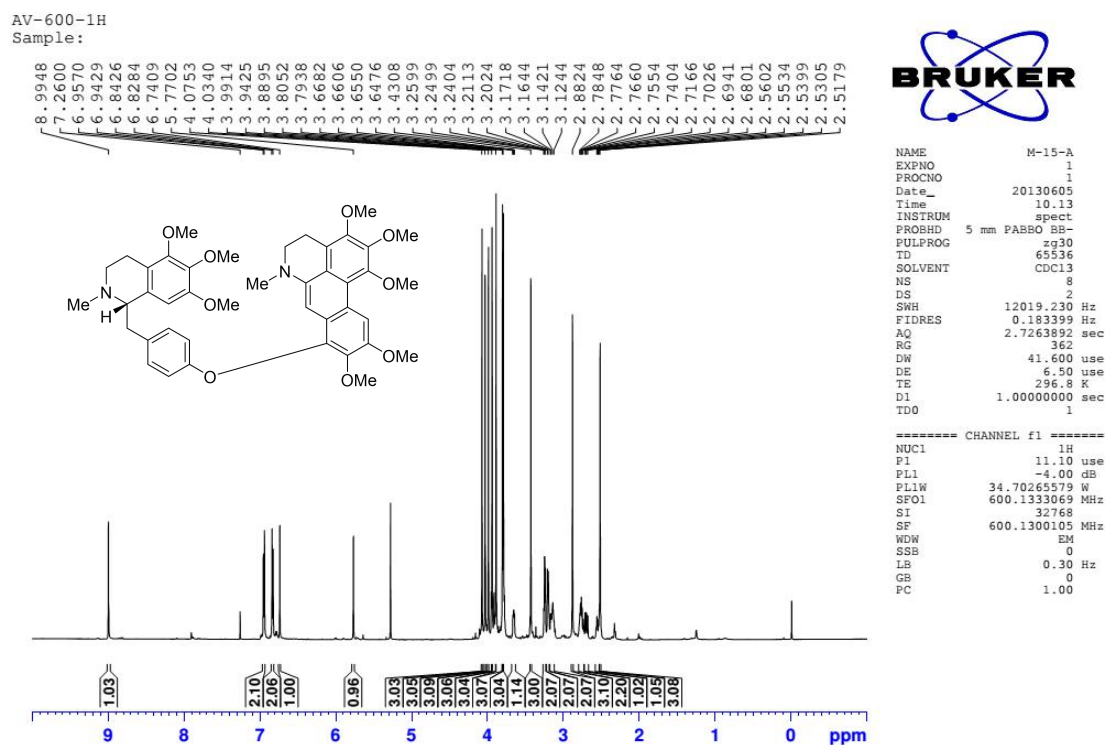

**Figure S6.4.**  $^{13}\text{C}$  NMR (150 MHz,  $\text{CDCl}_3$ ) spectrum of compound **9**

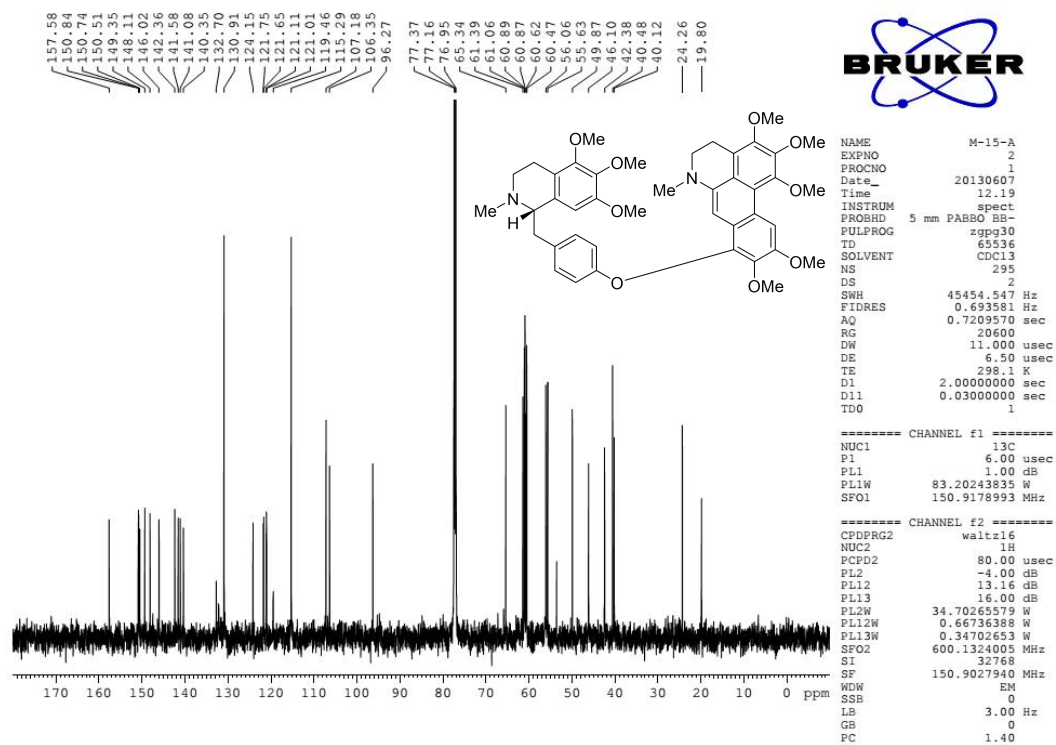

Figure S6.5. HSQC (600 MHz, CDCl<sub>3</sub>) spectrum of compound 9

AV-600-HSQC  
Sample:

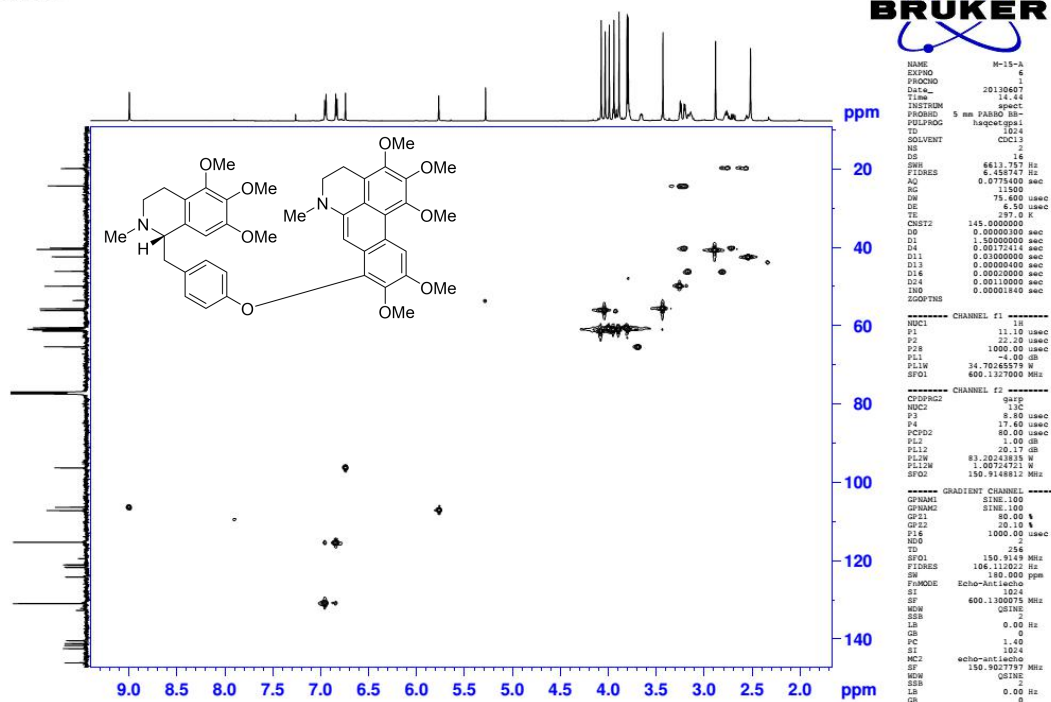

Figure S6.6. HMBC (600 MHz, CDCl<sub>3</sub>) spectrum of compound 9

AV-600-HMBC  
Sample:

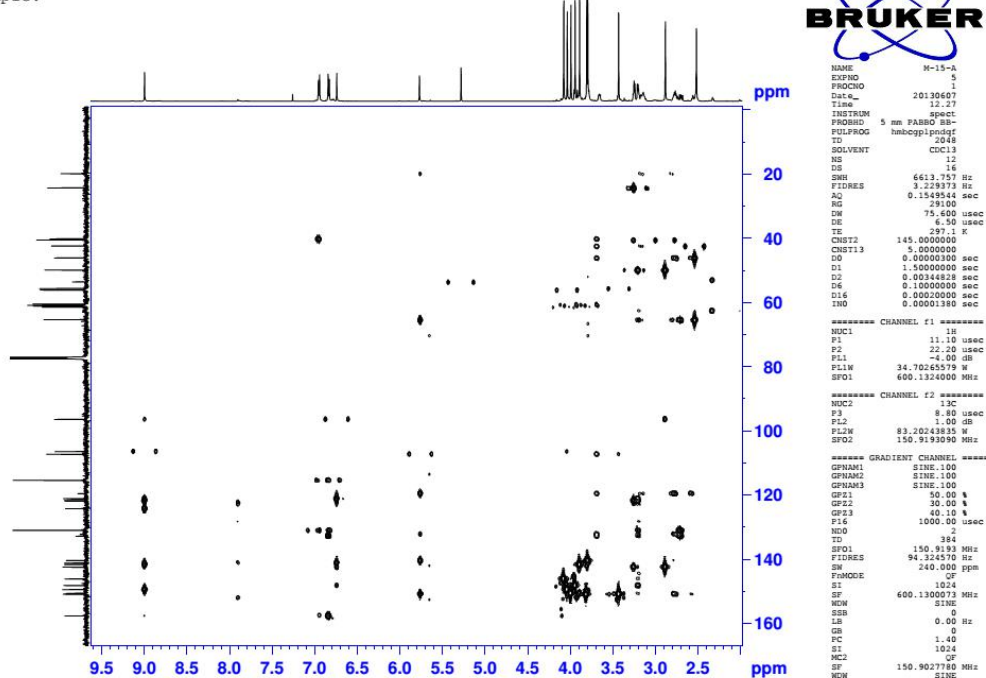



**Figure S6.7. HRESIMS of compound 9**

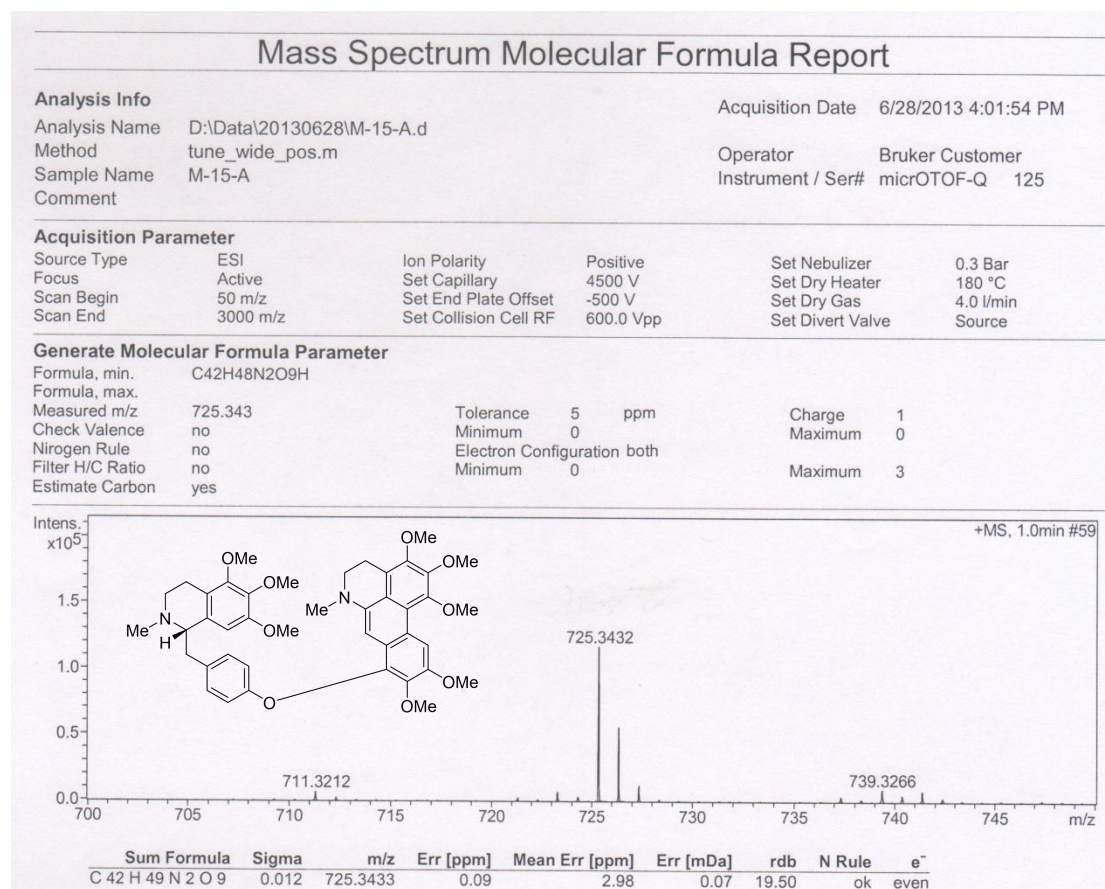

**Figure S6.8.** ECD spectrum of compound **9**

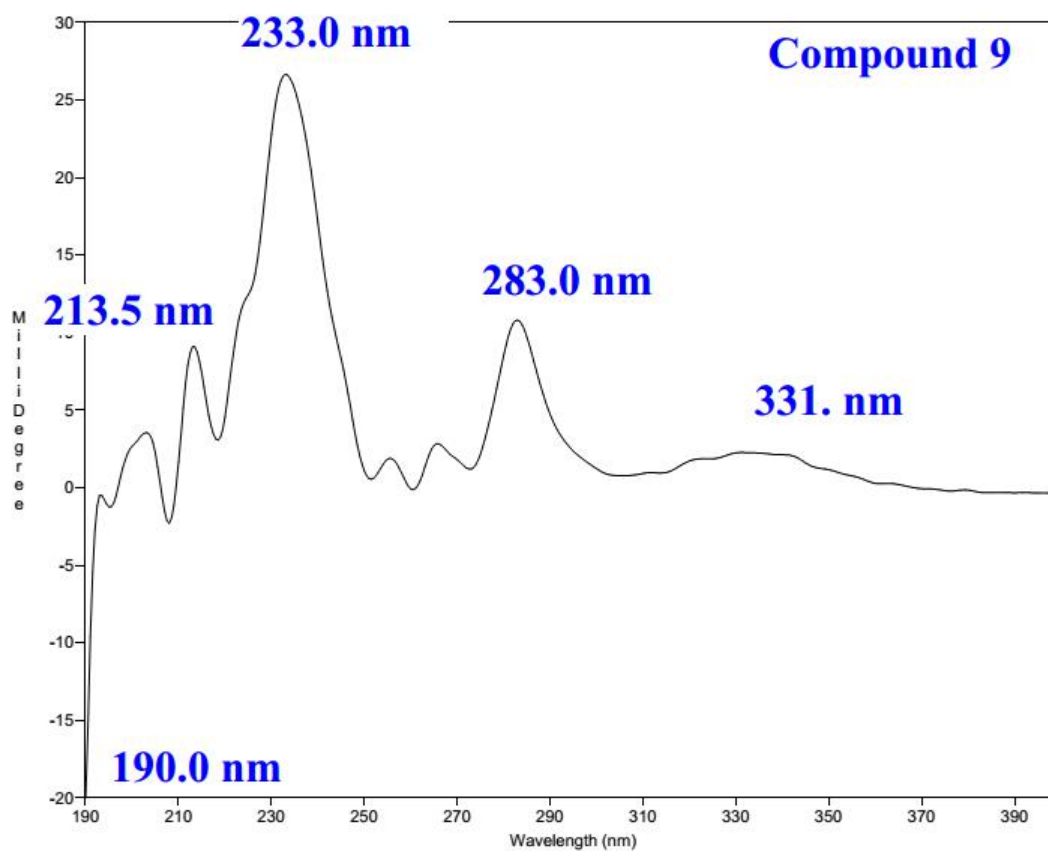

Bio-Kine Software V4.71 Date : 2014-3-7 Time : 13:30:38

**COMMENTS :**

File name : sav-golay  
Savitzky-Golay Smooth of sav-golay  
Window Points=15  
Polynomial Order=3  
Derivative=0

**Figure S6.9.** Key HMBC correlations of compound **9**

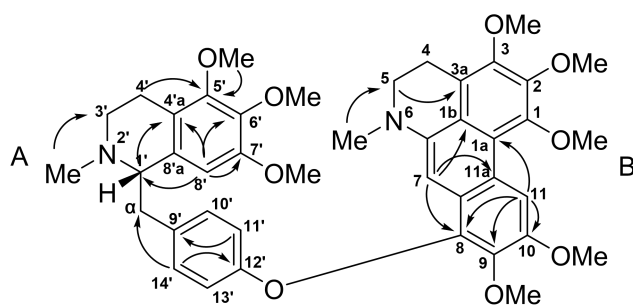

**Figure S7.1.** IR spectrum of compound **10**

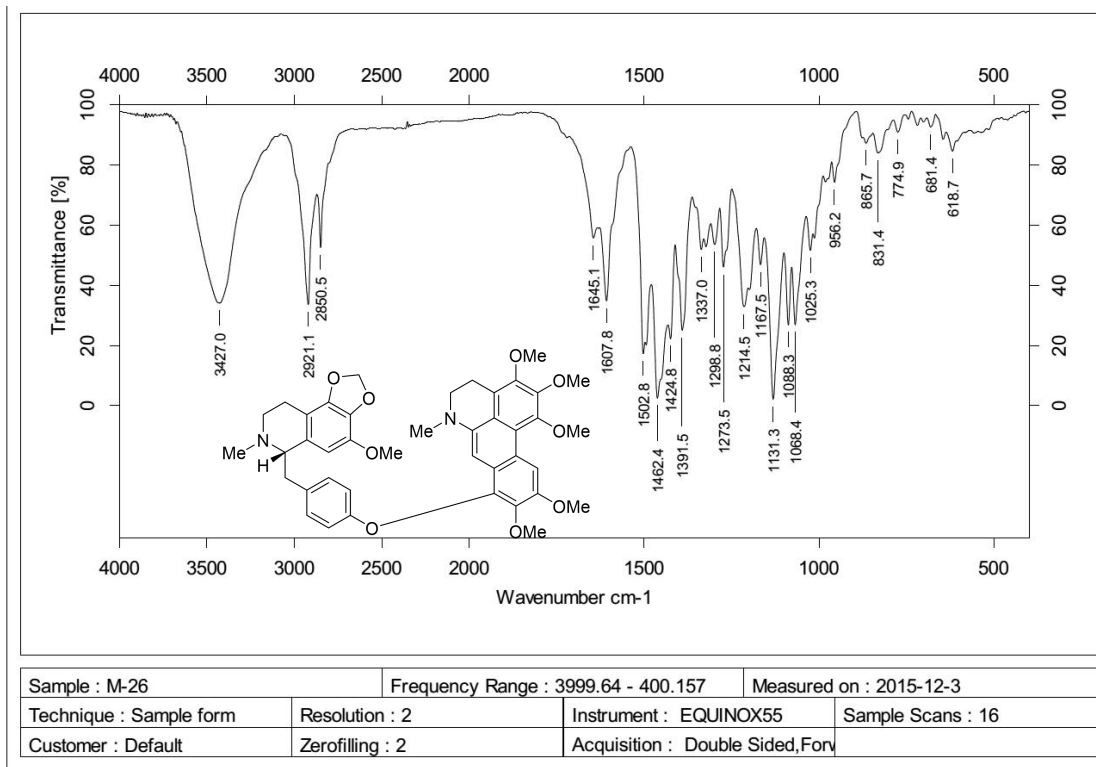

Figure S7.2. UV spectrum of compound 10

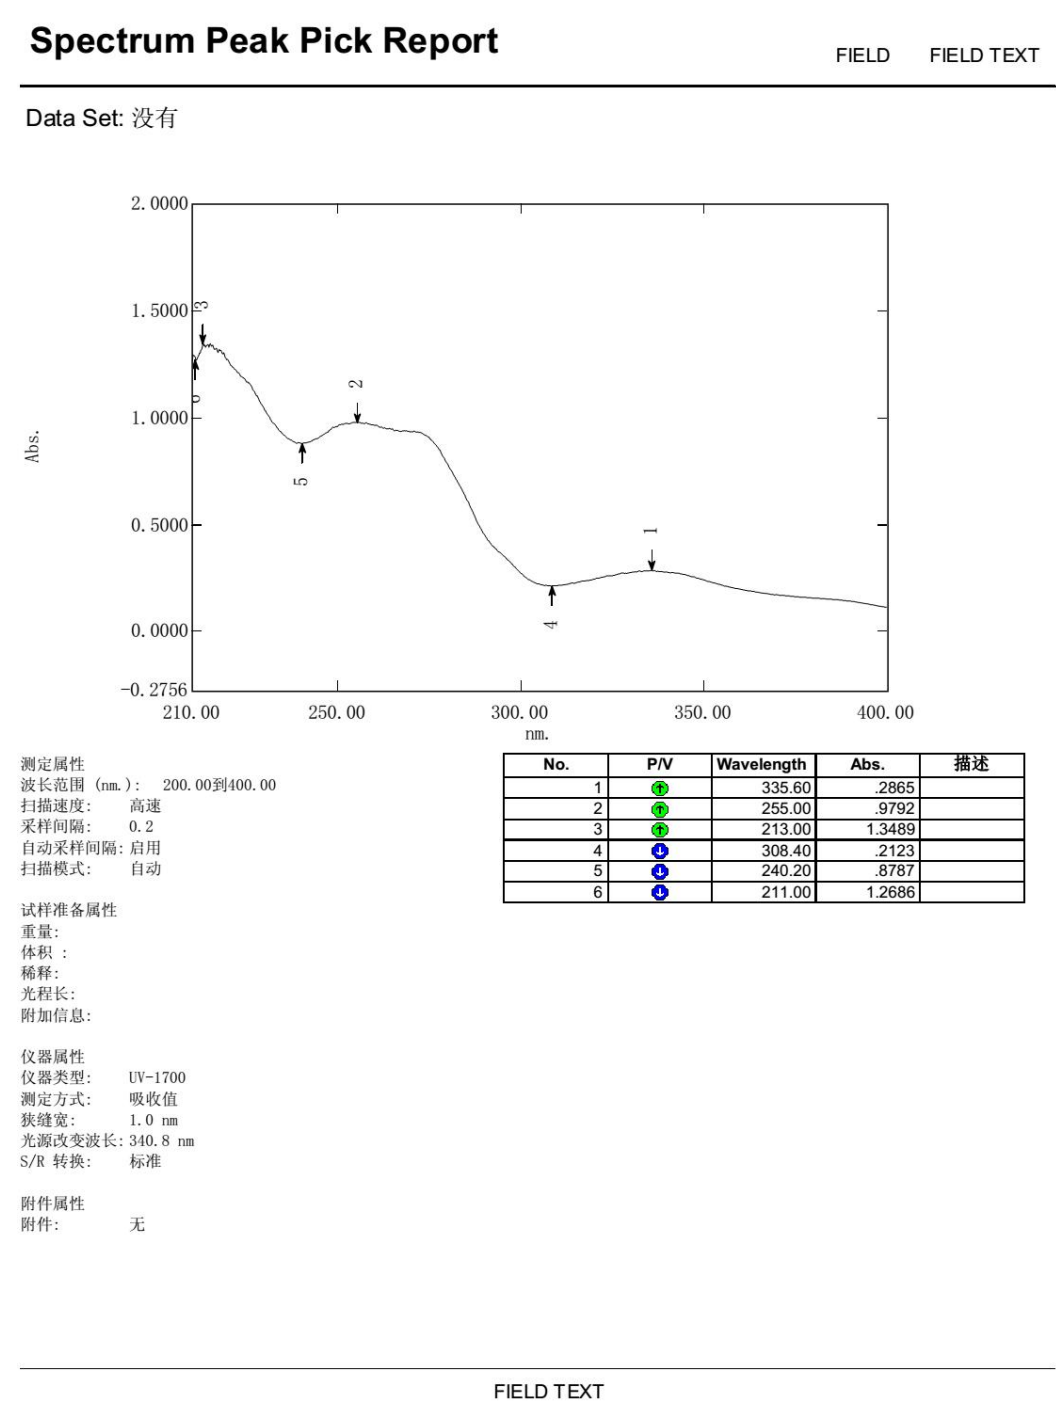

AV-600-1H  
Sample:

Chemical structure of compound 10 is shown, featuring a dimeric molecule with two chromane-like units linked by a biphenyl group. The structure is labeled with 'Me' for methyl groups.

**1H NMR Spectrum Data (Chemical Shifts in ppm):**

- 8.9975, 7.2600, 6.9499, 6.9356, 6.8452, 6.8309, 6.7257, 5.9368, 5.9349, 5.9260, 5.9240, 5.5382, 4.0765, 4.0351, 3.9920, 3.9421, 3.8875, 3.7939, 3.7849, 3.7772, 3.4576, 3.3870, 3.3344, 3.3247, 3.2645, 3.2538, 3.2444, 3.2125, 3.2048, 3.2006, 3.1891, 2.9780, 2.9645, 2.8815, 2.8122, 2.8063, 2.7950, 2.7838, 2.7779, 2.7667, 2.7253, 2.7101, 2.7033, 2.6881, 2.6276, 2.6018

**Integration Values:** 1.00, 2.08, 2.01, 1.01, 2.06, 1.02, 3.16, 3.14, 3.16, 3.12, 3.13, 1.12, 3.10, 2.04, 2.13, 2.06, 1.09, 3.04, 1.17, 1.17, 1.06, 3.20

**Channel f1 Parameters:**

- NUC1 1H
- P1 11.10 usec
- PL1 -4.00 dB
- PL1W 34.70265579 W
- SFO1 600.1333069 MHz
- SI 32768
- SF 600.1300106 MHz
- WDW EM
- SSB 0
- LB 0.30 Hz
- GB 0
- PC 1.00

Chemical structure of compound 1 is shown, which is a complex polycyclic molecule with a methoxy group and a methoxy-substituted phenyl ring. The structure is labeled with 'Me' and 'OMe' groups.

<sup>1</sup>H NMR spectrum (CDCl<sub>3</sub>) of compound 1. The spectrum shows peaks from 0 to 8 ppm. The chemical shift values are listed on the left side of the spectrum.

| Chemical Shift (ppm) |
|----------------------|
| 157.83               |
| 150.54               |
| 149.38               |
| 148.15               |
| 146.06               |
| 146.00               |
| 142.42               |
| 141.58               |
| 141.07               |
| 131.06               |
| 124.15               |
| 121.79               |
| 121.69               |
| 121.15               |
| 121.05               |
| 115.43               |
| 106.96               |
| 106.42               |
| 101.59               |
| 90.27                |
| 77.37                |
| 77.16                |
| 76.95                |
| 65.32                |
| 61.43                |
| 61.12                |
| 60.94                |
| 60.66                |
| 56.12                |
| 56.09                |
| 49.90                |
| 44.72                |
| 41.73                |
| 40.54                |
| 40.38                |
| 24.29                |
| 18.12                |

Figure S7.5. HSQC (600 MHz, CDCl<sub>3</sub>) spectrum of compound 10

AV-600-HSQC  
Sample:

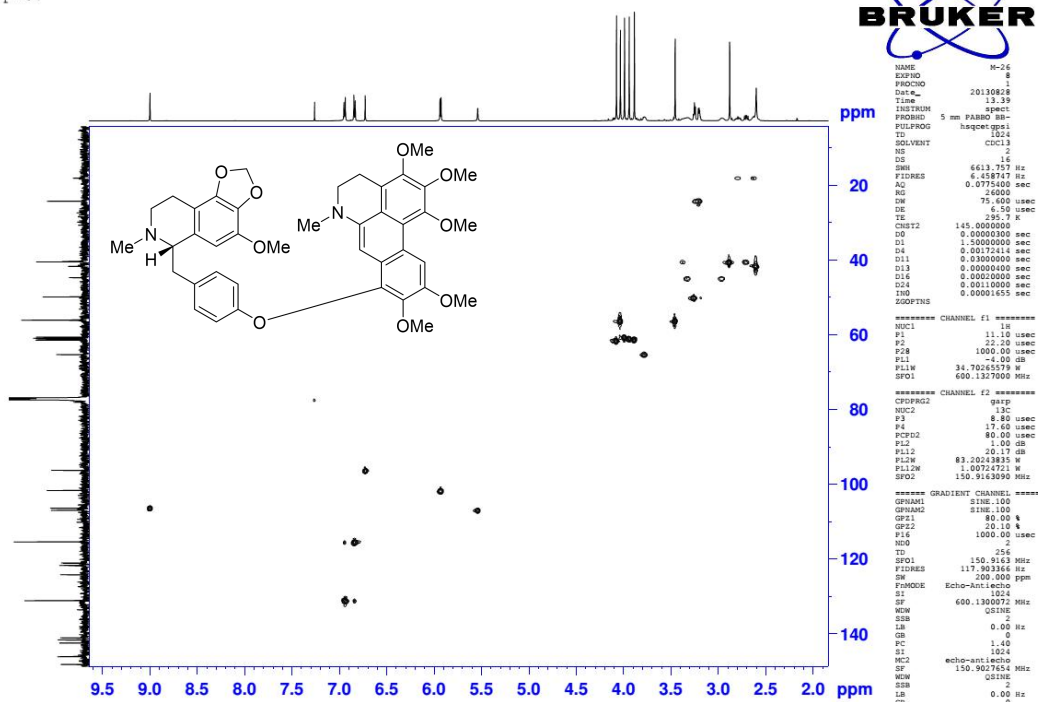

Figure S7.6. HMBC (600 MHz, CDCl<sub>3</sub>) spectrum of compound 10

AV-600-HMBC  
Sample:

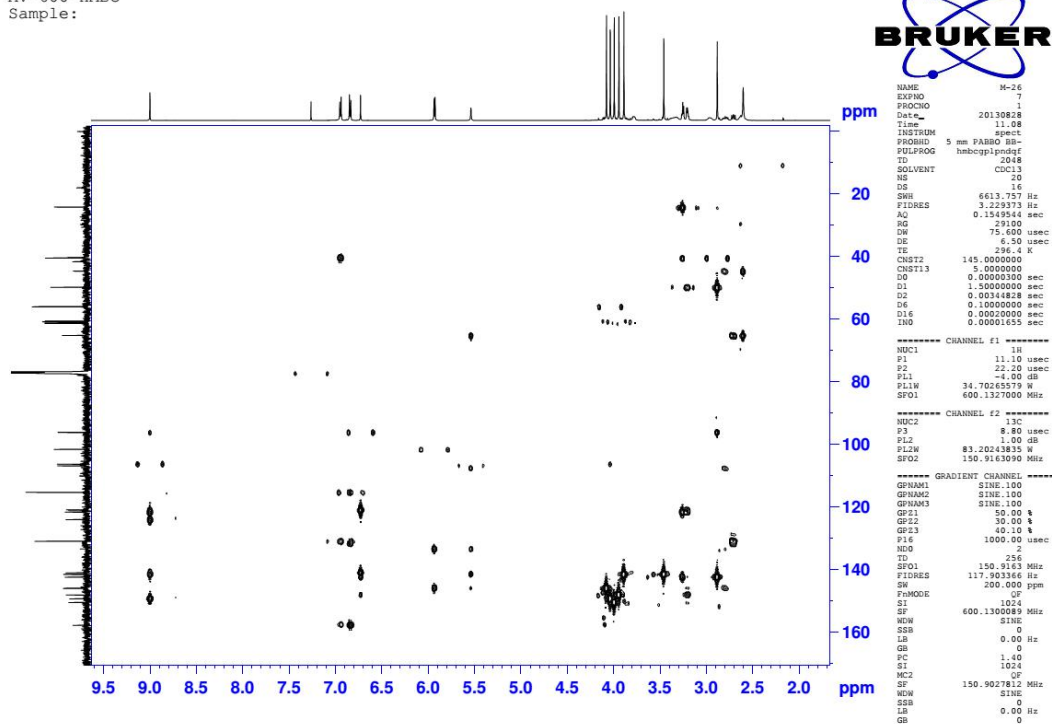

**Figure S7.7.** NOESY (600 MHz, CDCl<sub>3</sub>) spectrum of compound **10**

AV-600-NOESY  
Sample:

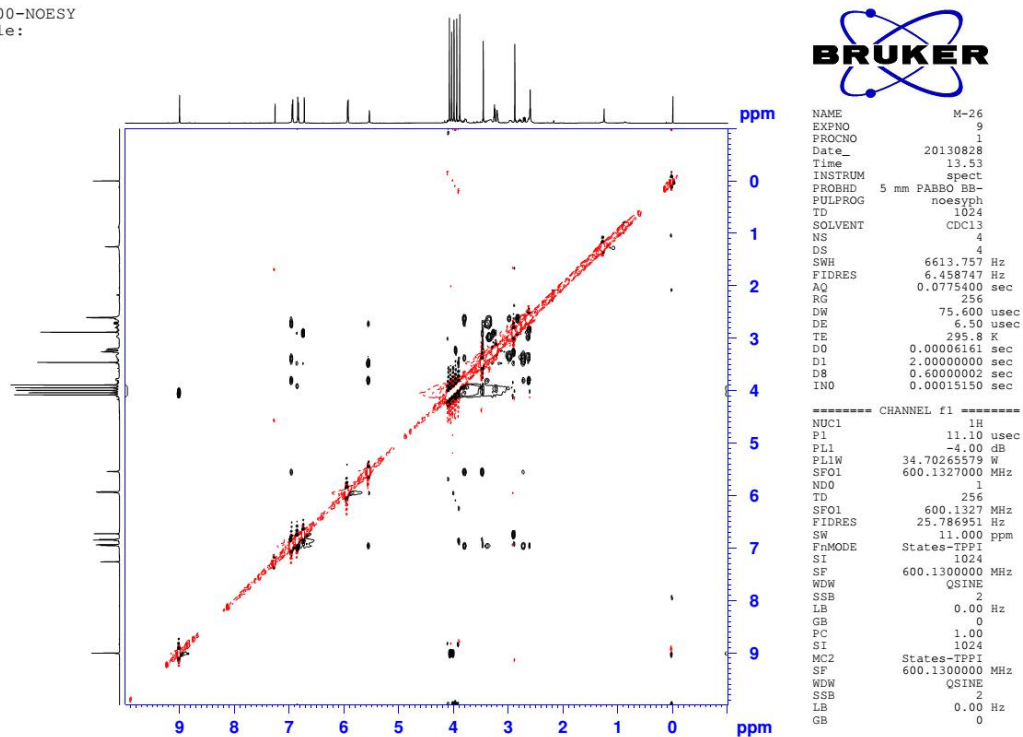



**Figure S7.8.** HRESIMS of compound **10**

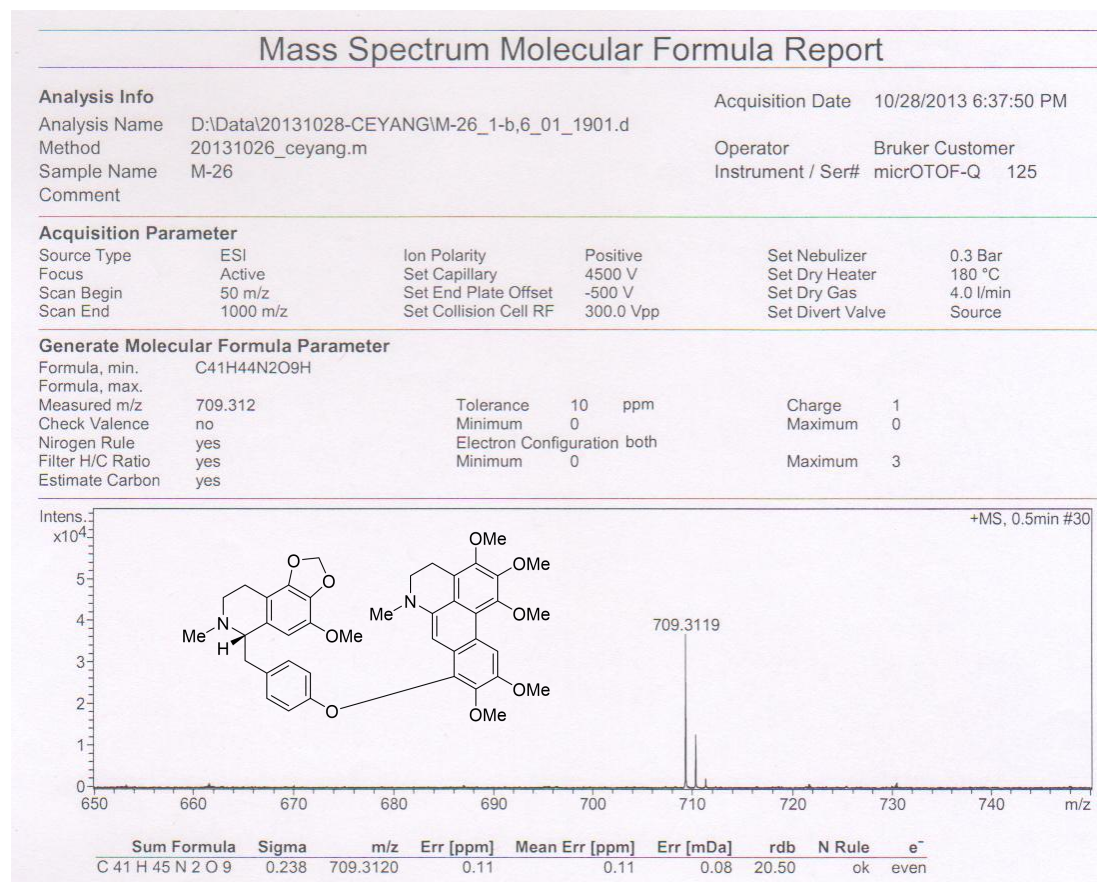



**Figure S7.9.** ECD spectrum of compound **10**

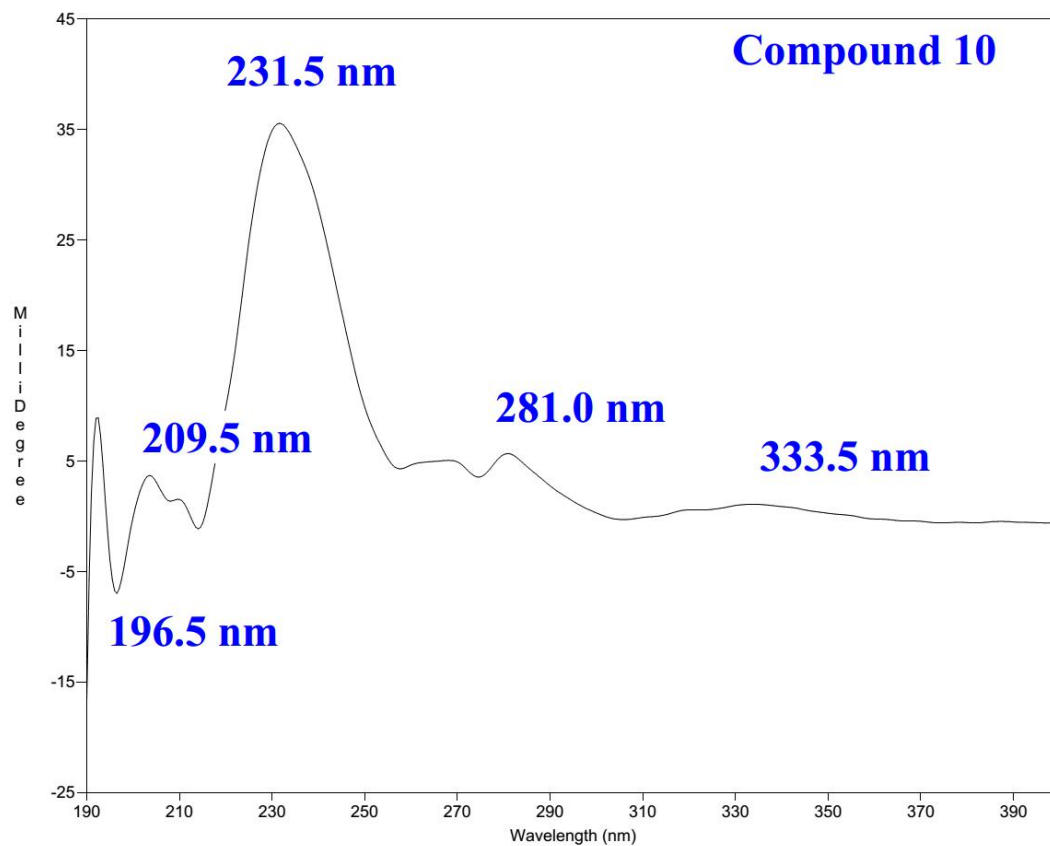

Bio-Kine Software V4.71 Date : 2014-3-7 Time : 14:09:03

**COMMENTS :**

File name : sav-golay  
Savitzky-Golay Smooth of sav-golay  
Window Points=15  
Polynomial Order=3  
Derivative=0

**Figure S7.10.** Key HMBC correlations of compound **10**

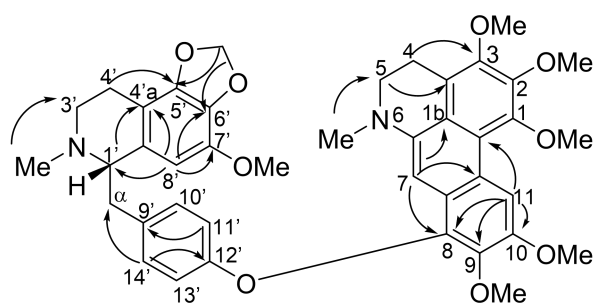

**Figure S7.11.** Key NOESY correlations of compound **10**

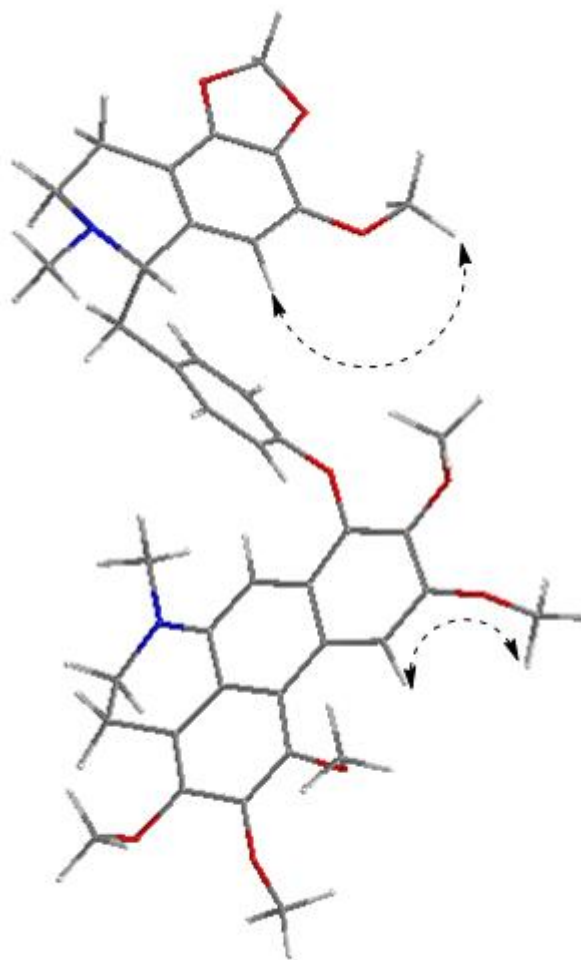

**Figure S8.1.** IR spectrum of compound **12**

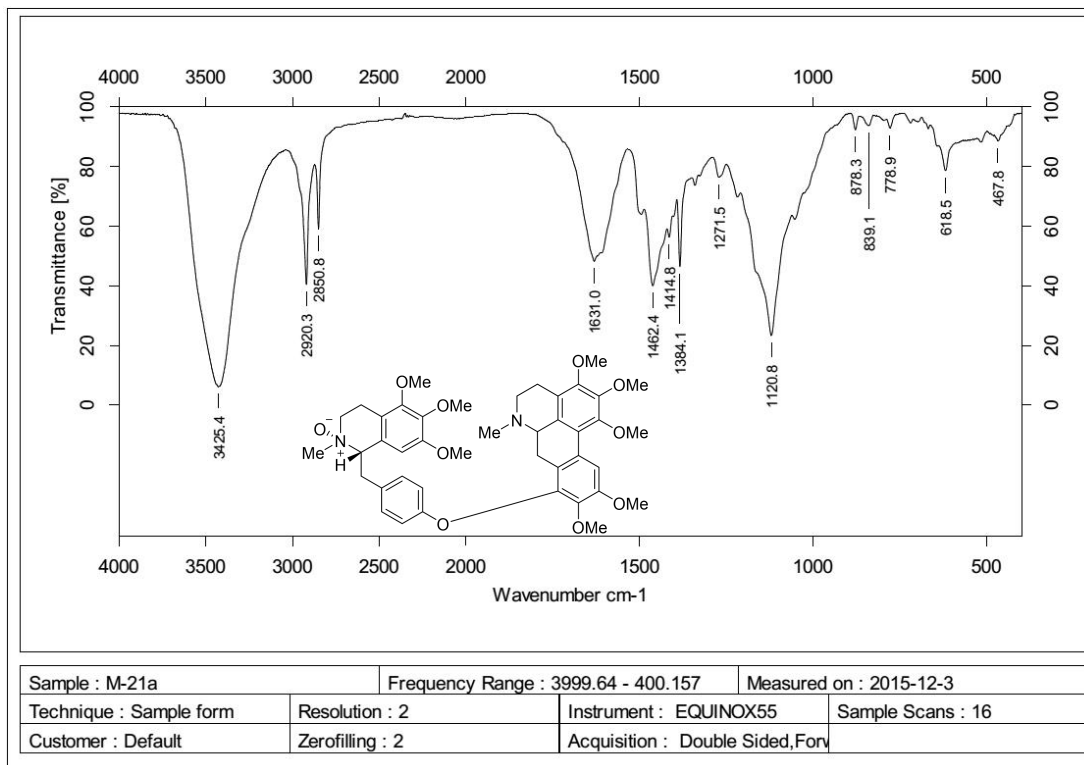

Figure S8.2. UV spectrum of compound 12

Spectrum Peak Pick Report

FIELD FIELD TEXT

Data Set: 没有

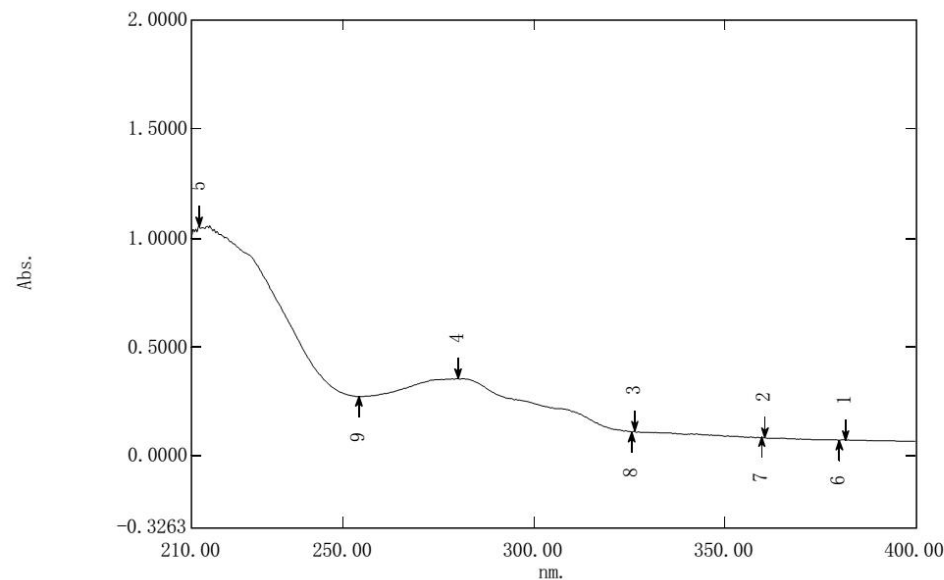

测定属性  
波长范围 (nm.): 200.00到400.00  
扫描速度: 高速  
采样间隔: 0.2  
自动采样间隔: 启用  
扫描模式: 自动

试样准备属性  
重量:  
体积:  
稀释:  
光程长:  
附加信息:

仪器属性  
仪器类型: UV-1700  
测定方式: 吸收值  
狭缝宽: 1.0 nm  
光源改变波长: 340.8 nm  
S/R 转换: 标准

附件属性  
附件: 无

| No. | P/V | Wavelength | Abs.   | 描述 |
|-----|-----|------------|--------|----|
| 1   | ↑   | 381.60     | .0740  |    |
| 2   | ↑   | 360.40     | .0844  |    |
| 3   | ↑   | 326.40     | .1124  |    |
| 4   | ↑   | 280.00     | .3547  |    |
| 5   | ↑   | 212.00     | 1.0574 |    |
| 6   | ↓   | 380.20     | .0717  |    |
| 7   | ↓   | 359.60     | .0833  |    |
| 8   | ↓   | 325.60     | .1108  |    |
| 9   | ↓   | 253.80     | .2717  |    |
| 10  | ↓   | 205.80     | .8616  |    |

FIELD TEXT

**Figure S8.3.**  $^1\text{H}$  NMR (600 MHz,  $\text{CDCl}_3$ ) spectrum of compound **12**

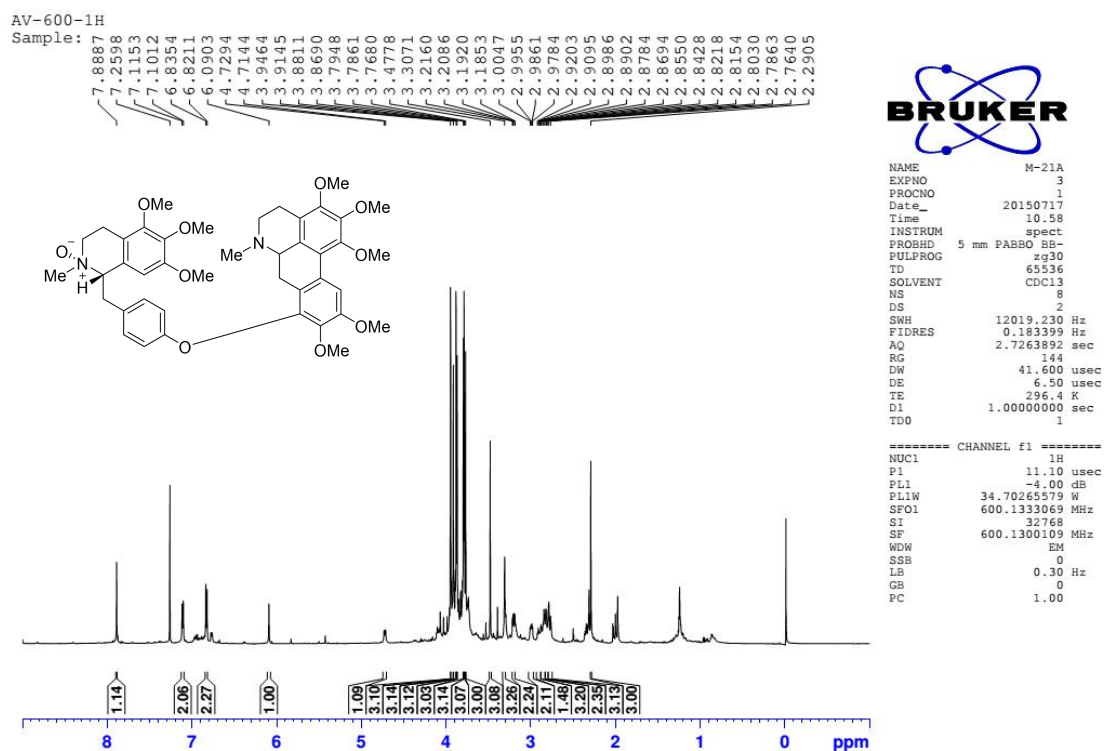

**Figure S8.4.**  $^{13}\text{C}$  NMR (100 MHz,  $\text{CDCl}_3$ ) spectrum of compound **12**

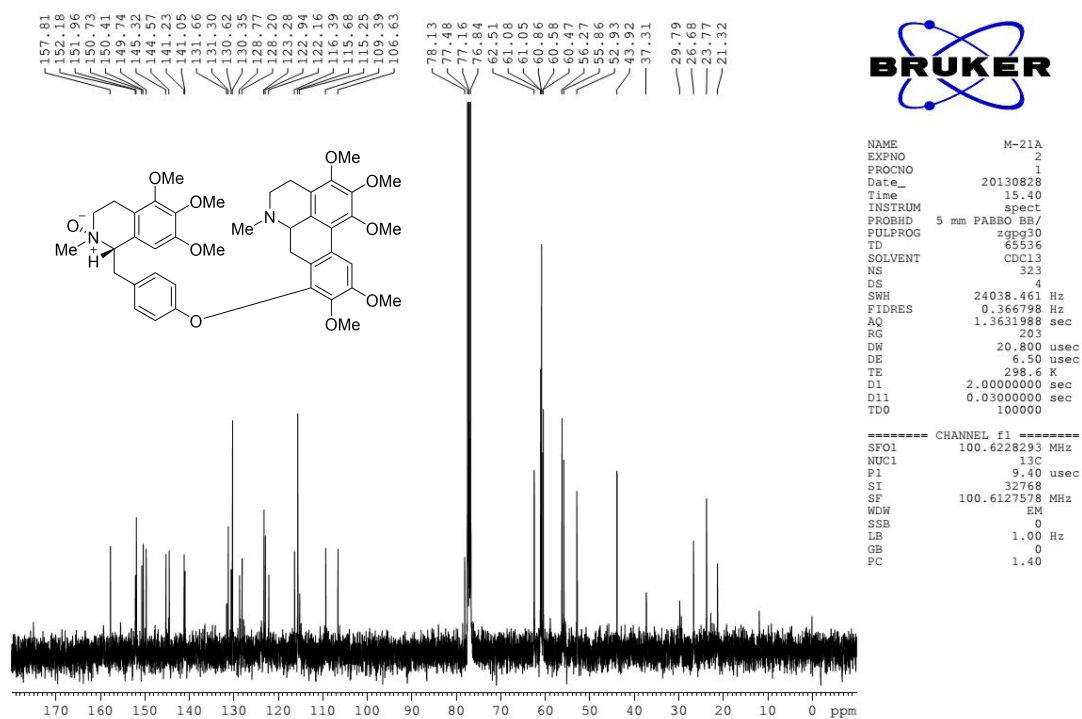

Figure S8.5. HSQC (600 MHz, CDCl<sub>3</sub>) spectrum of compound 12

AV-600-HSQC  
Sample:

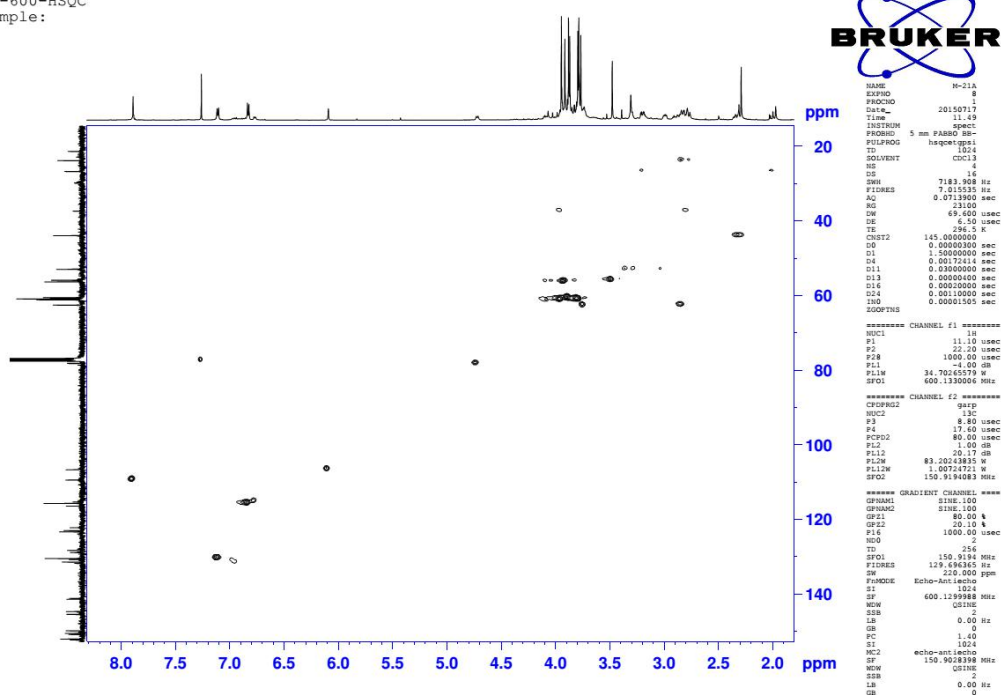

Figure S8.6. HMBC (600 MHz, CDCl<sub>3</sub>) spectrum of compound 12

AV-600-HMBC  
Sample:

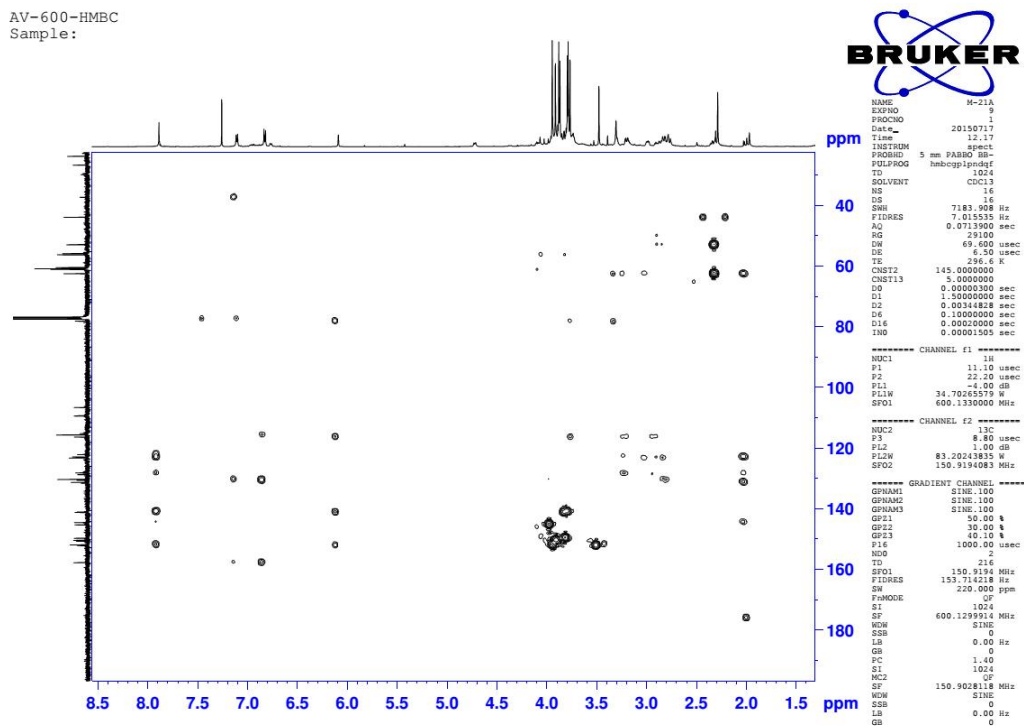

**Figure S8.7.** NOESY (600 MHz, CDCl<sub>3</sub>) spectrum of compound **12**

AV-600-NOESY  
Sample:

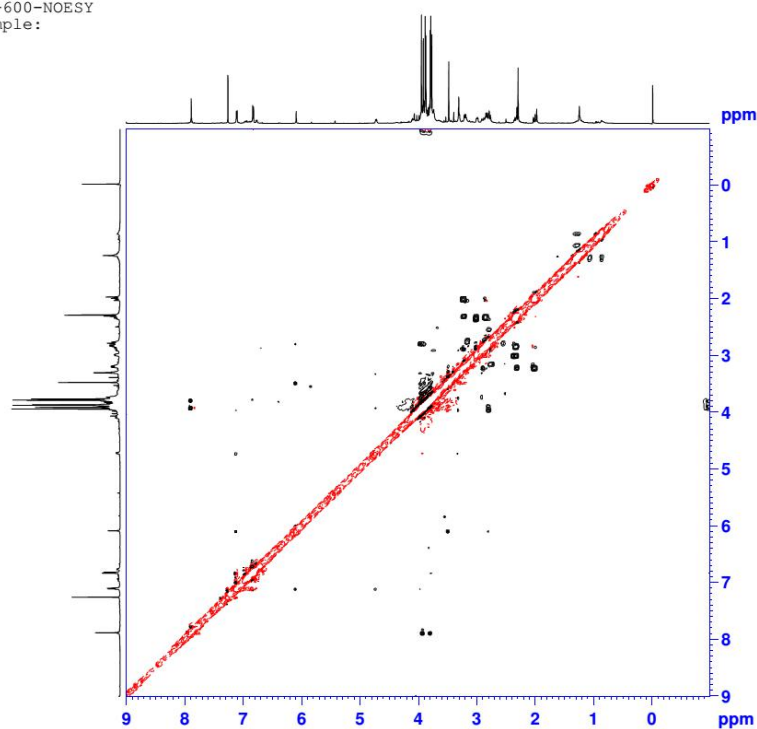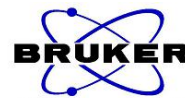

```

NAME           M-21A
EXPNO          7
PROCNO         1
Date_          20150717
Time           11.03
INSTRUM        spect
PROBHD         5 mm PABBO BB-
PULPROG        noesyph
TD             1024
SOLVENT        CDCl3
NS             4
DS             4
SWH            7183.908 Hz
FIDRES         7.015535 Hz
AQ            0.0713900 sec
RG            80.6
DW            69.600 usec
DE            6.50 usec
TE            296.4 K
D0            0.00005547 sec
D1            2.00000000 sec
D8            0.60000002 sec
IN0           0.00013920 sec
  
```

```

===== CHANNEL f1 =====
NUC1           1H
P1            11.10 usec
PL1           -4.00 dB
PL1W          34.70265579 W
SFO1          600.1330006 MHz
ND0           1
TD            256
SFO1          600.133 MHz
FIDRES        28.062078 Hz
SW            11.970 ppm
FnMODE        States-TPPI
SI            1024
SF            600.1300000 MHz
WDW           QSINE
SSB           2
LB            0.00 Hz
GB            0
PC            1.00
SI            1024
MC2           States-TPPI
SF            600.1300000 MHz
WDW           QSINE
SSB           2
LB            0.00 Hz
GB            0
  
```

Figure S8.8. HRESIMS of compound 12

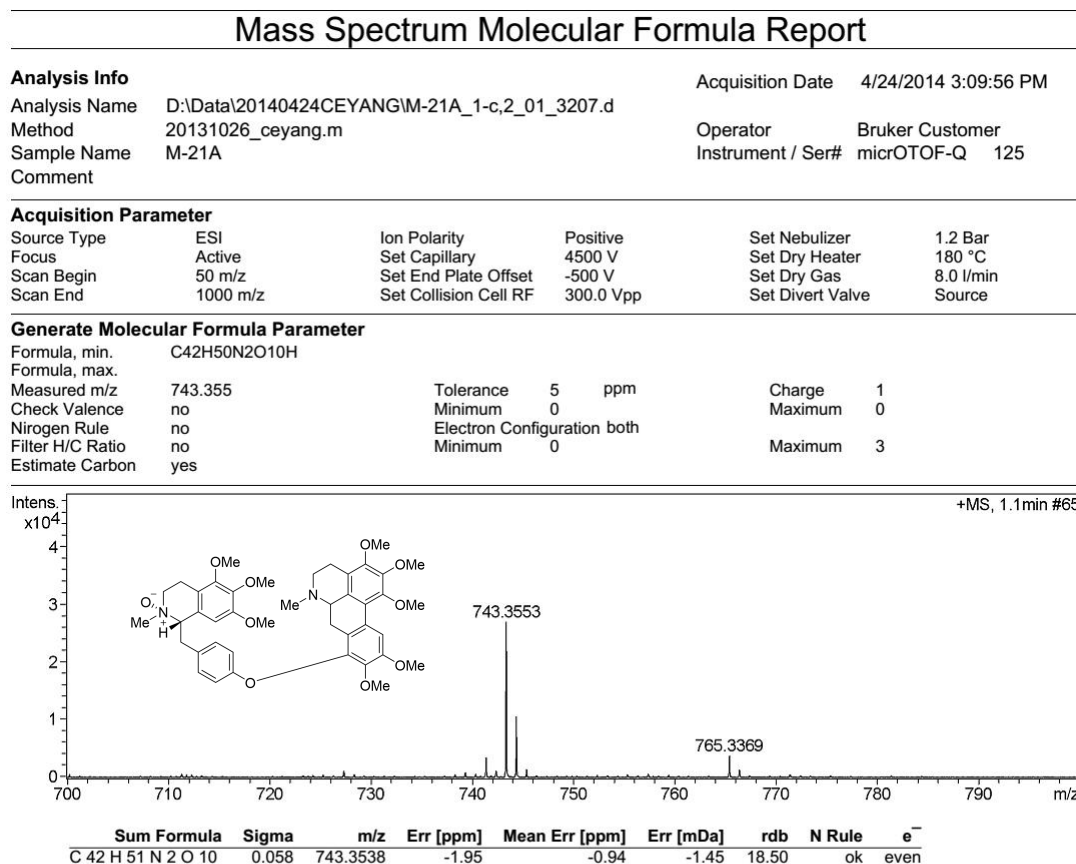



**Figure S8.9.** ECD spectrum of compound **12**

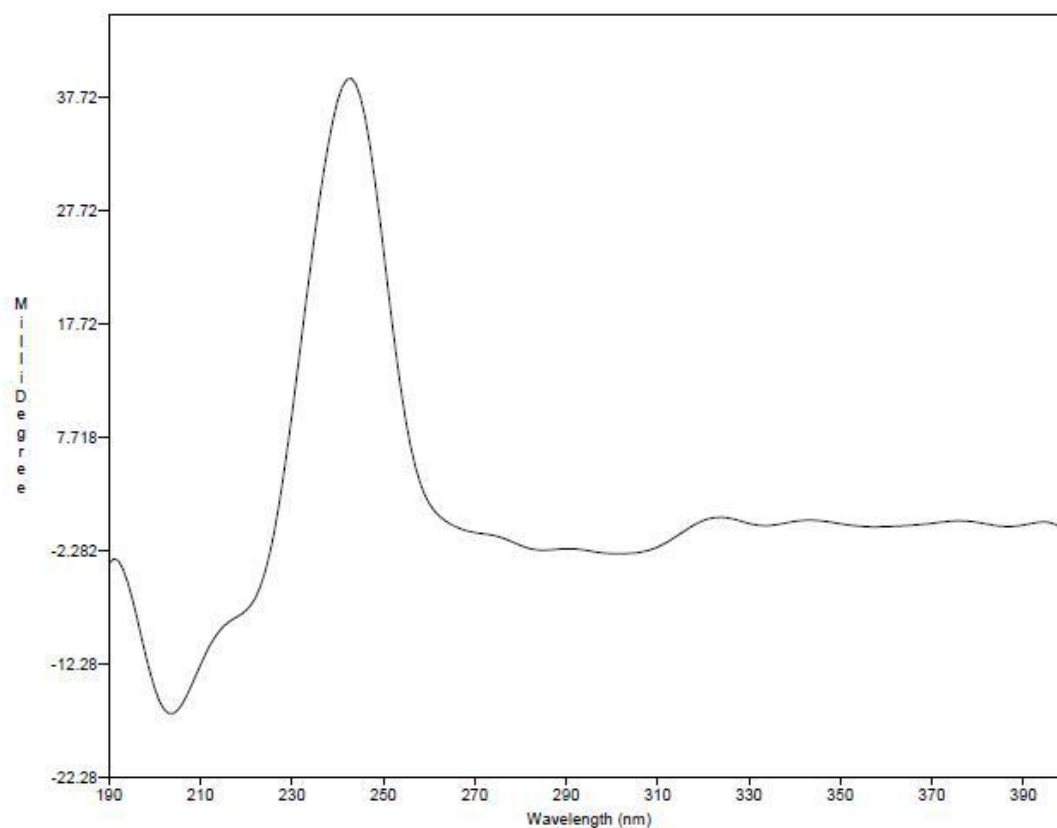

Bio-Kine Software V4.74 Date : 2016-10-27 Time : 20:44:07

**COMMENTS :**

File name : d:\华会明\胡旭\m-21a.bka  
Savitzky-Golay Smooth of sav-golay  
Window Points=15  
Polynomial Order=3  
Derivative=0

**Figure S8.10. Key HMBC correlations of compound 12**

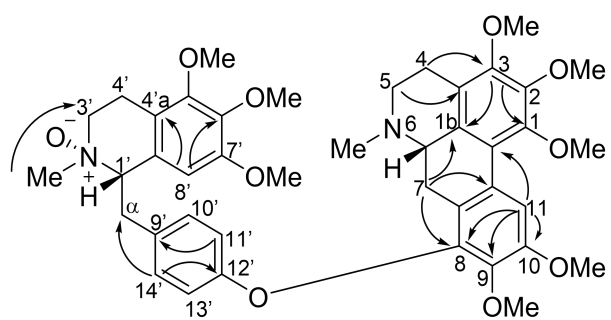

**Figure S8.11. Key NOESY correlations of compound 12**

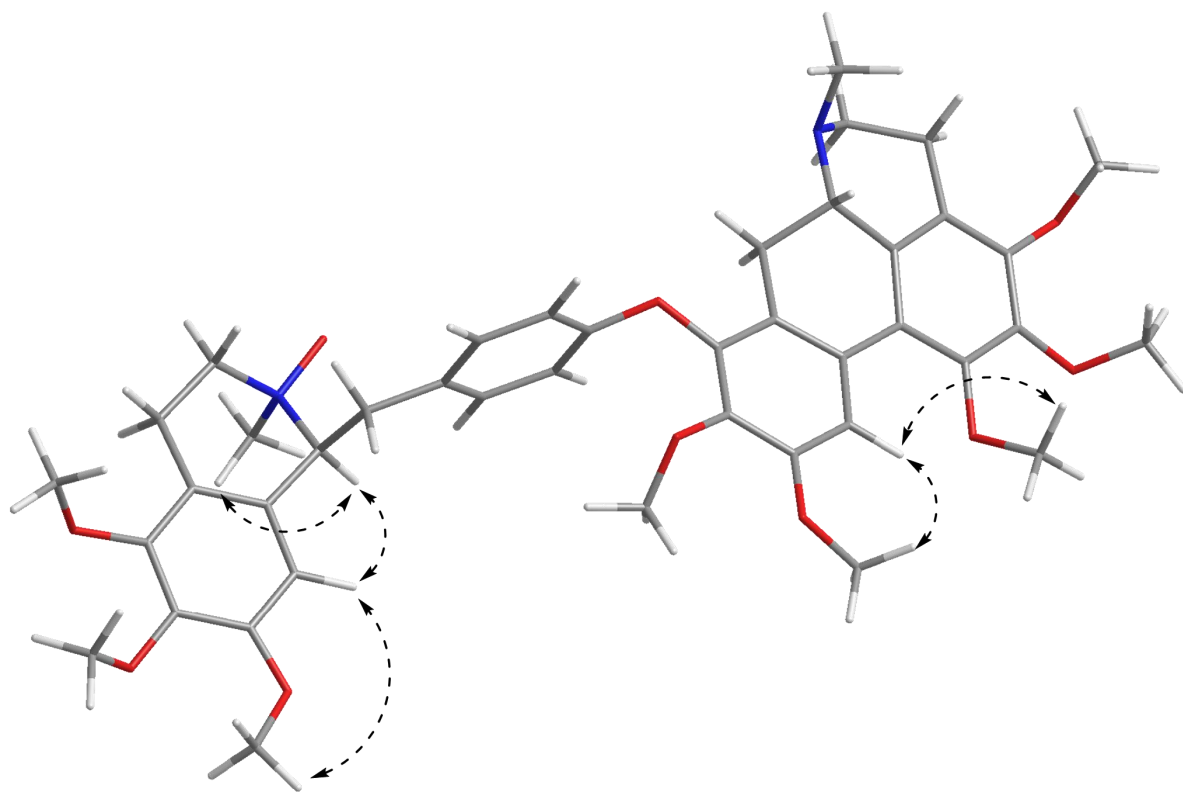

**Figure S9.1.** IR spectrum of compound **13**

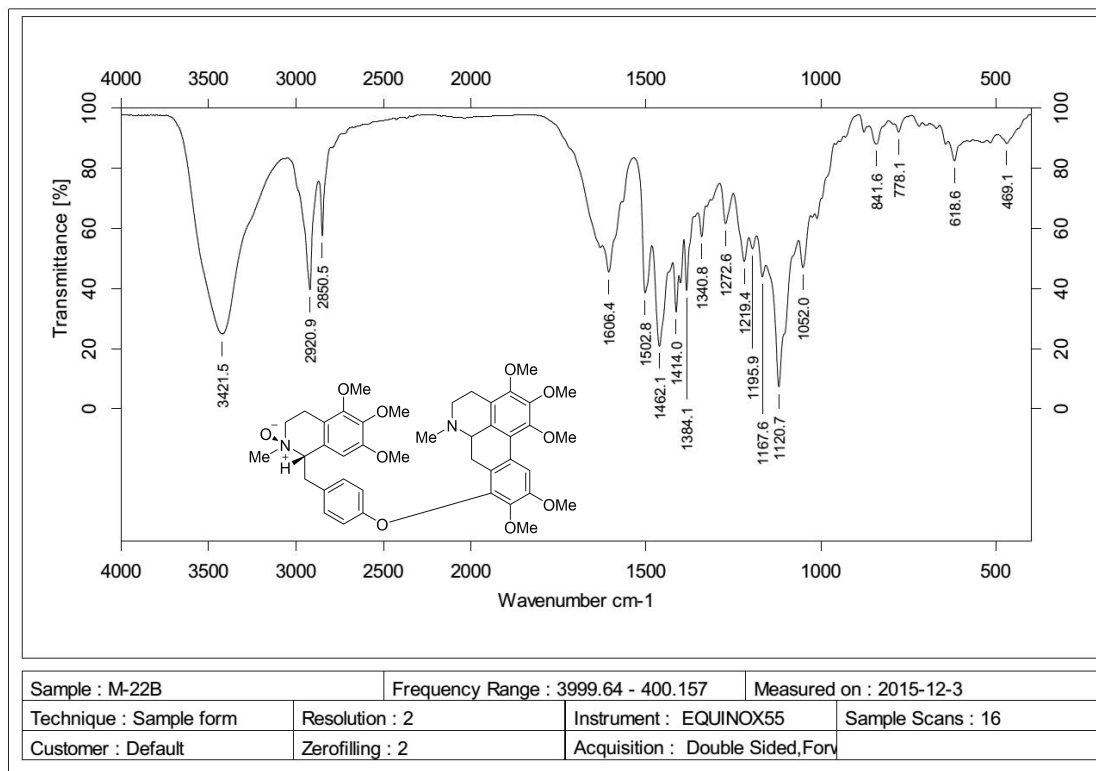

**Figure S9.2.**  $^1\text{H}$  NMR (400 MHz,  $\text{CDCl}_3$ ) spectrum of compound **13**

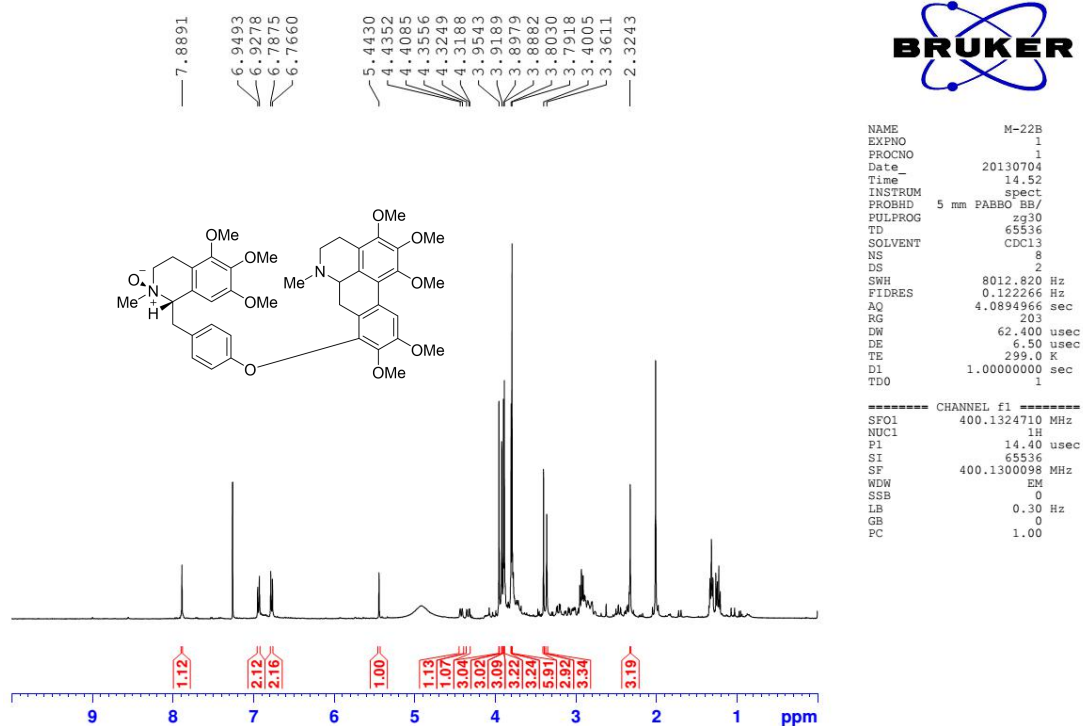

**Figure S9.3.**  $^{13}\text{C}$  NMR (100 MHz,  $\text{CDCl}_3$ ) spectrum of compound **13**

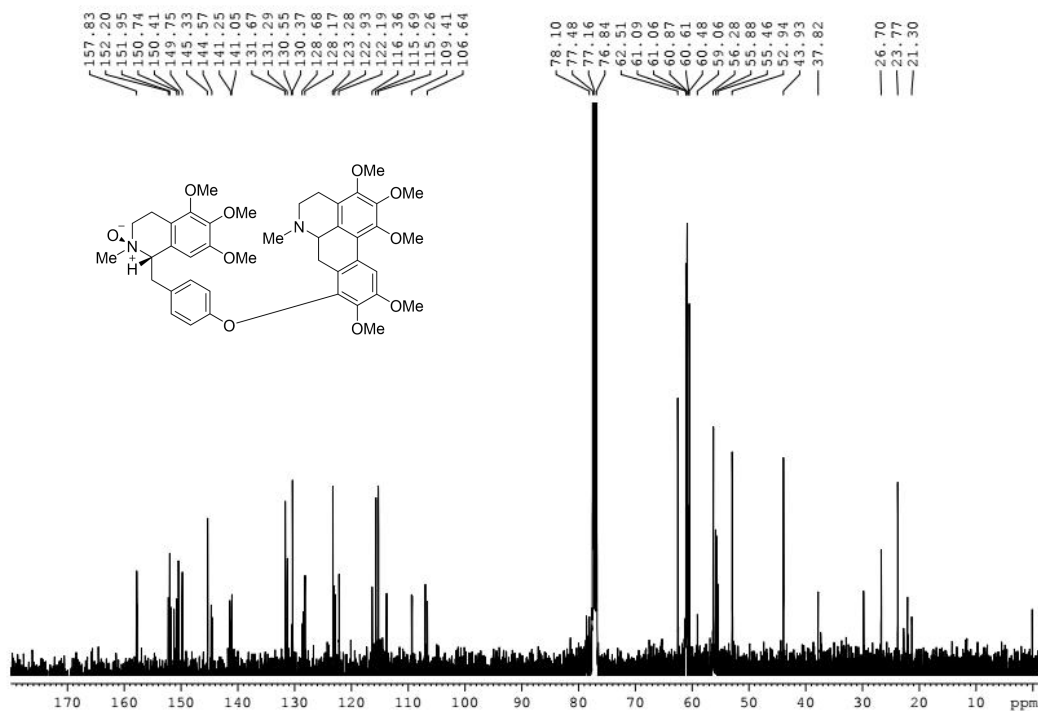

**Figure S9.4.** HSQC (600 MHz, CDCl<sub>3</sub>) spectrum of compound **13**

AV-600-HSQC  
Sample:

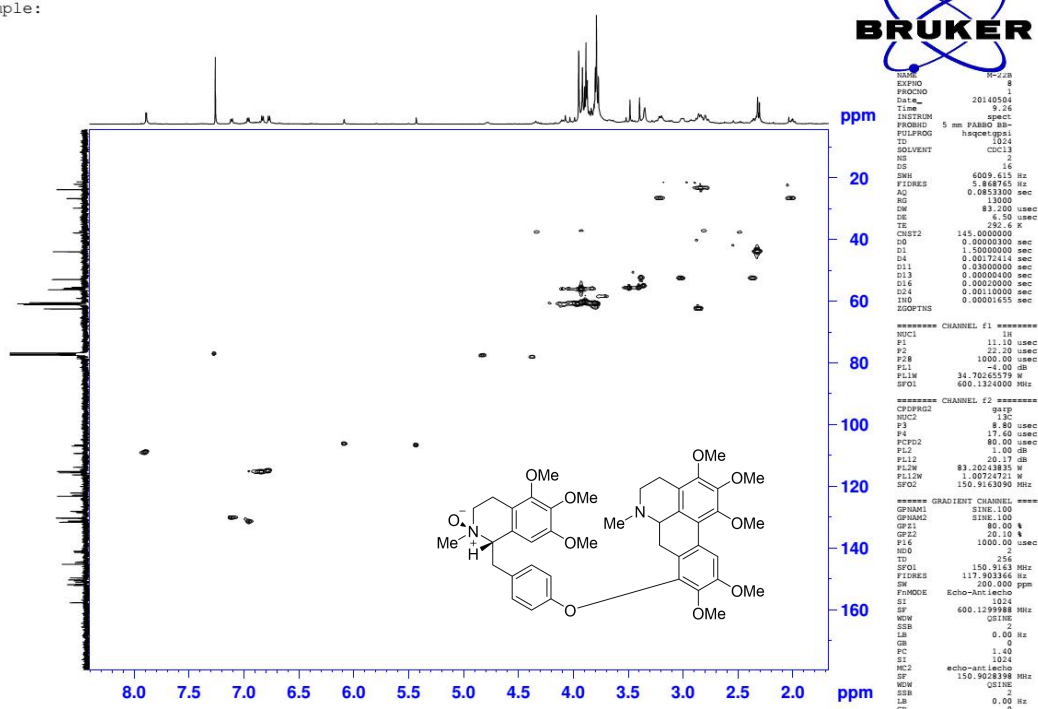

**Figure S9.5.** HMBC (600 MHz, CDCl<sub>3</sub>) spectrum of the new compound **13**

AV-600-HMBC  
Sample:

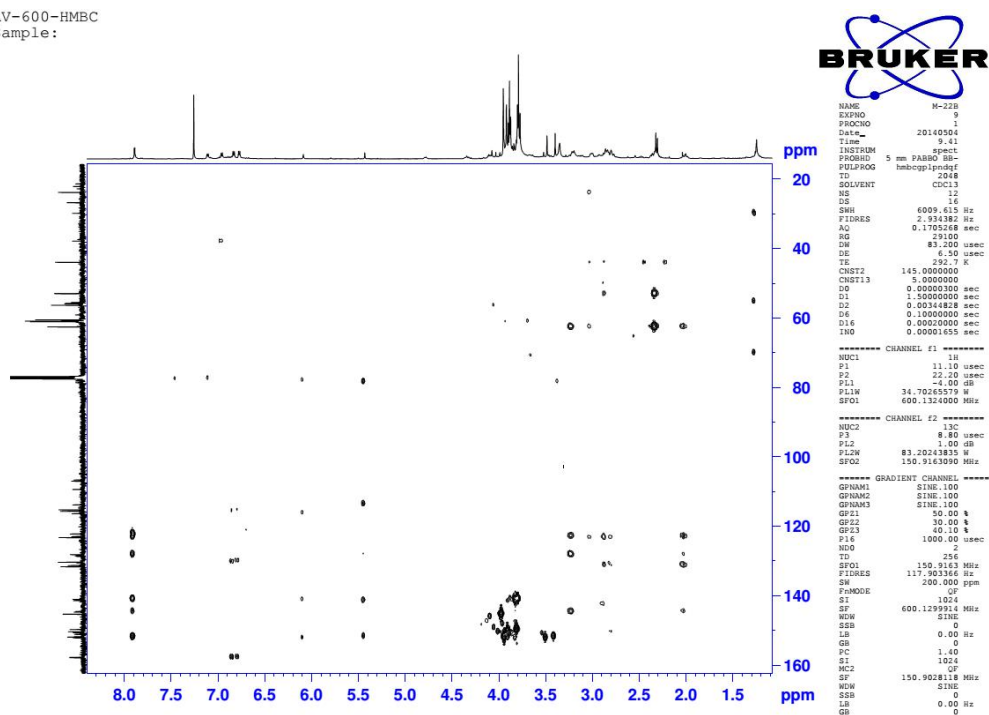

**Figure S9.6.** NOESY (600 MHz, CDCl<sub>3</sub>) spectrum of compound **13**

AV-600-NOESY  
Sample:

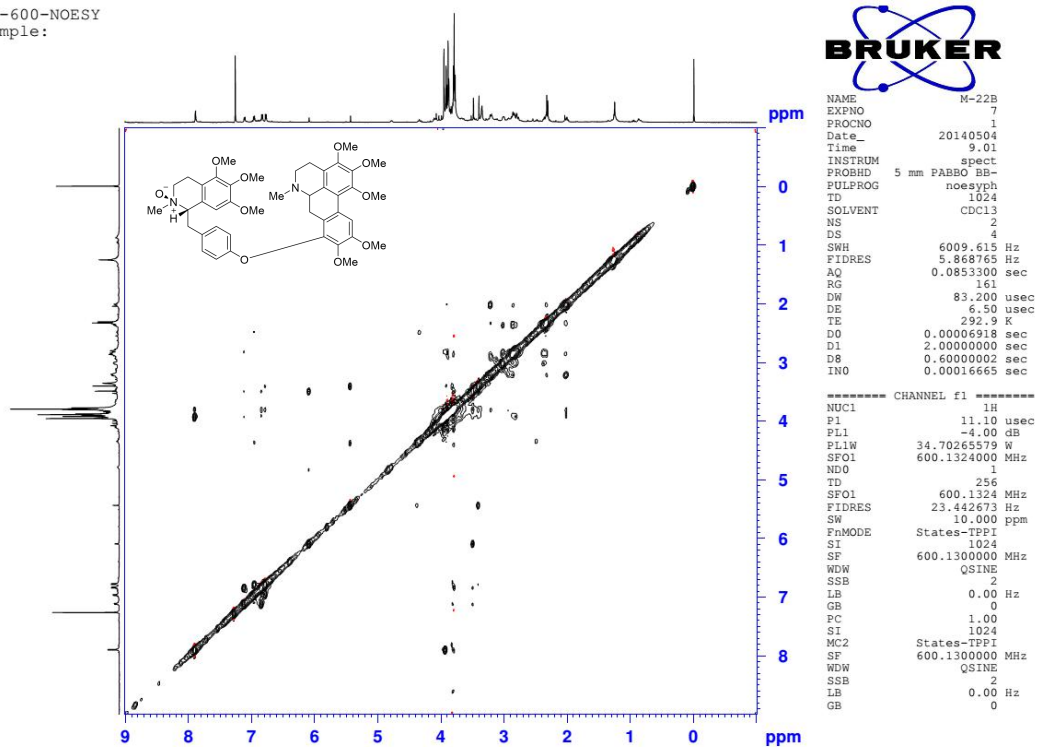

Figure S9.7. HRESIMS of compound 13

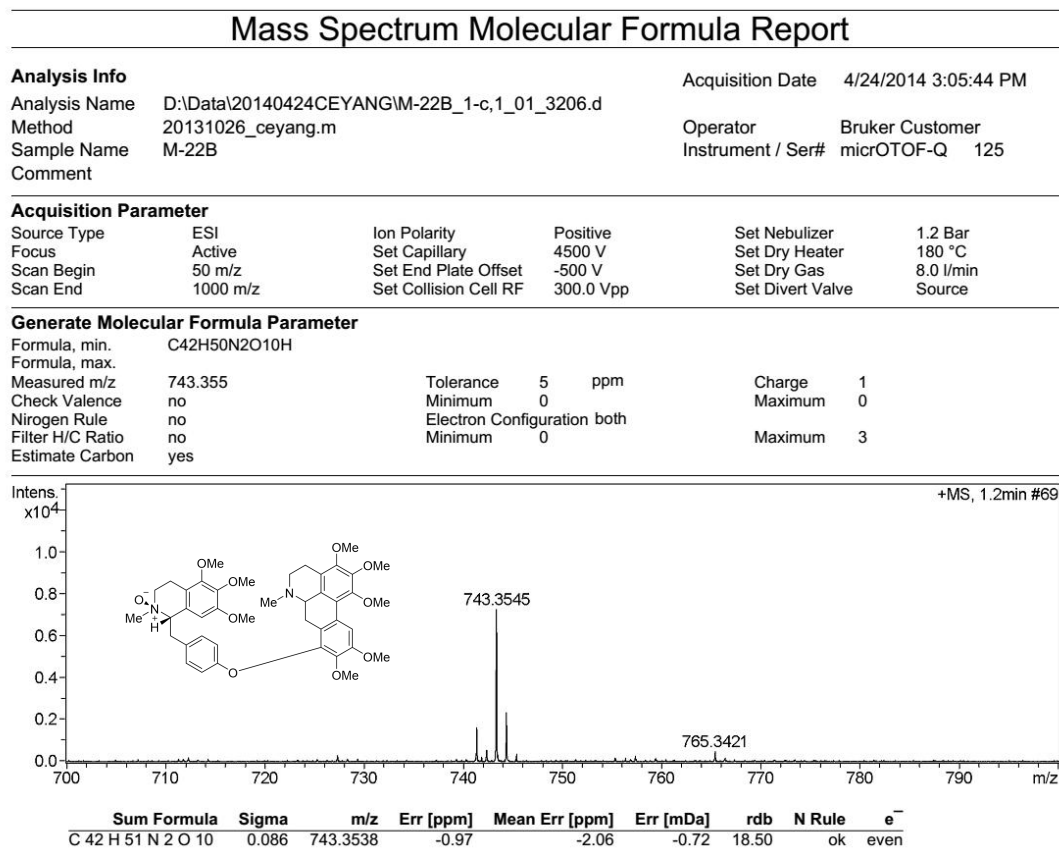

**Figure S9.8.** ECD spectrum of compound **13**

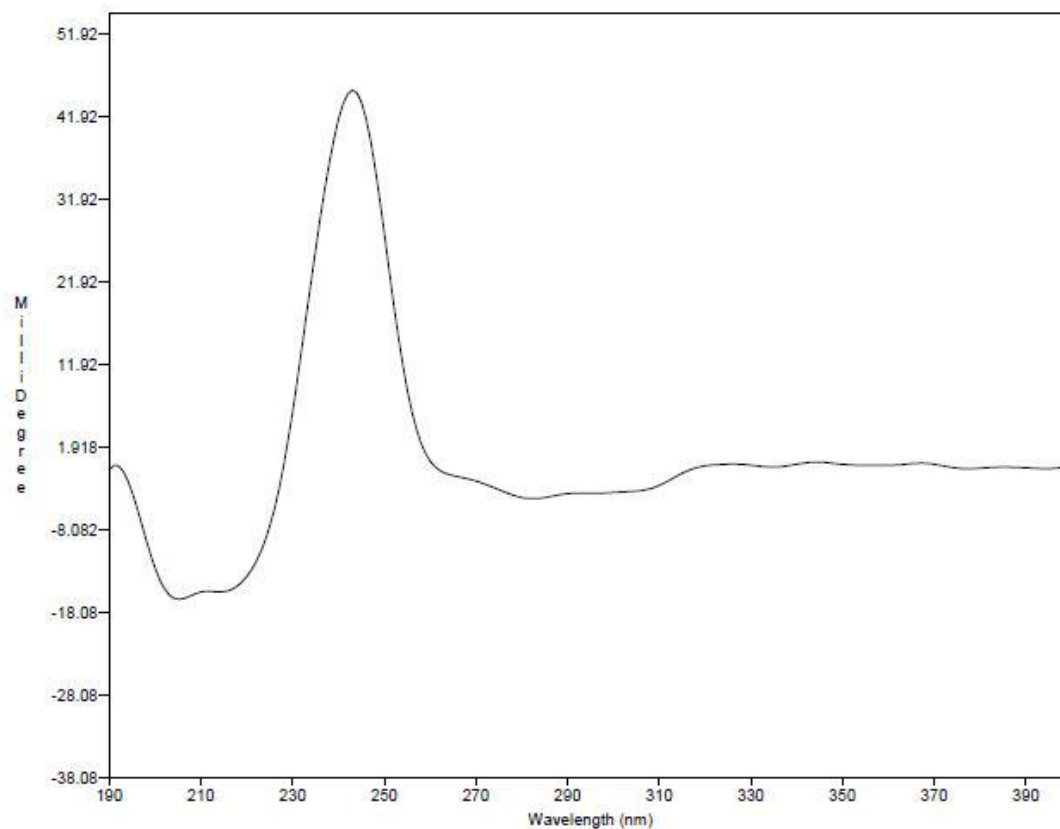

Bio-Kine Software V4.74 Date : 2016-10-27 Time : 20:41:00

**COMMENTS :**

File name : d:\华会明\胡旭\m-22b.bka  
 Savitzky-Golay Smooth of sav-golay  
 Window Points=15  
 Polynomial Order=3  
 Derivative=0

**Figure S9.9.** Key HMBC correlations of compound **13**

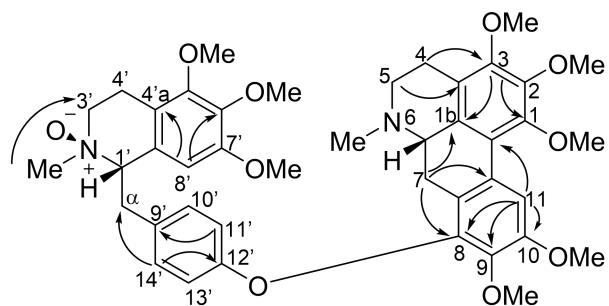



**Figure S10.1.** IR spectrum of compound **14**

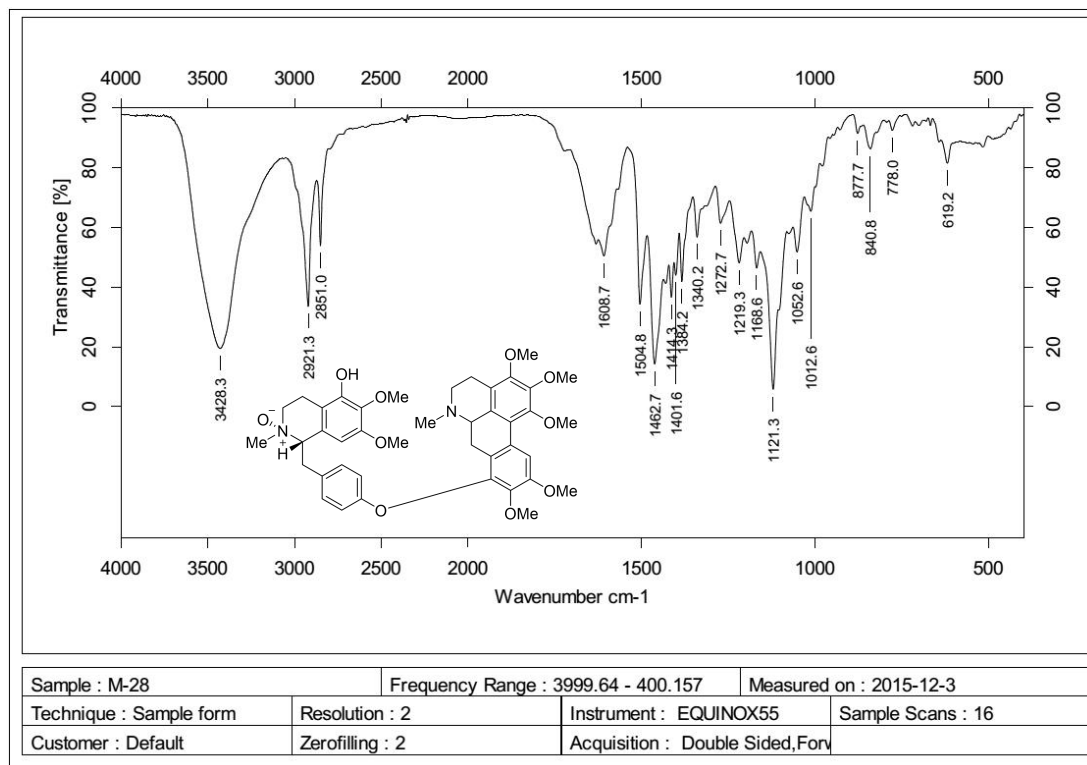

Figure S10.2. UV spectrum of compound 14

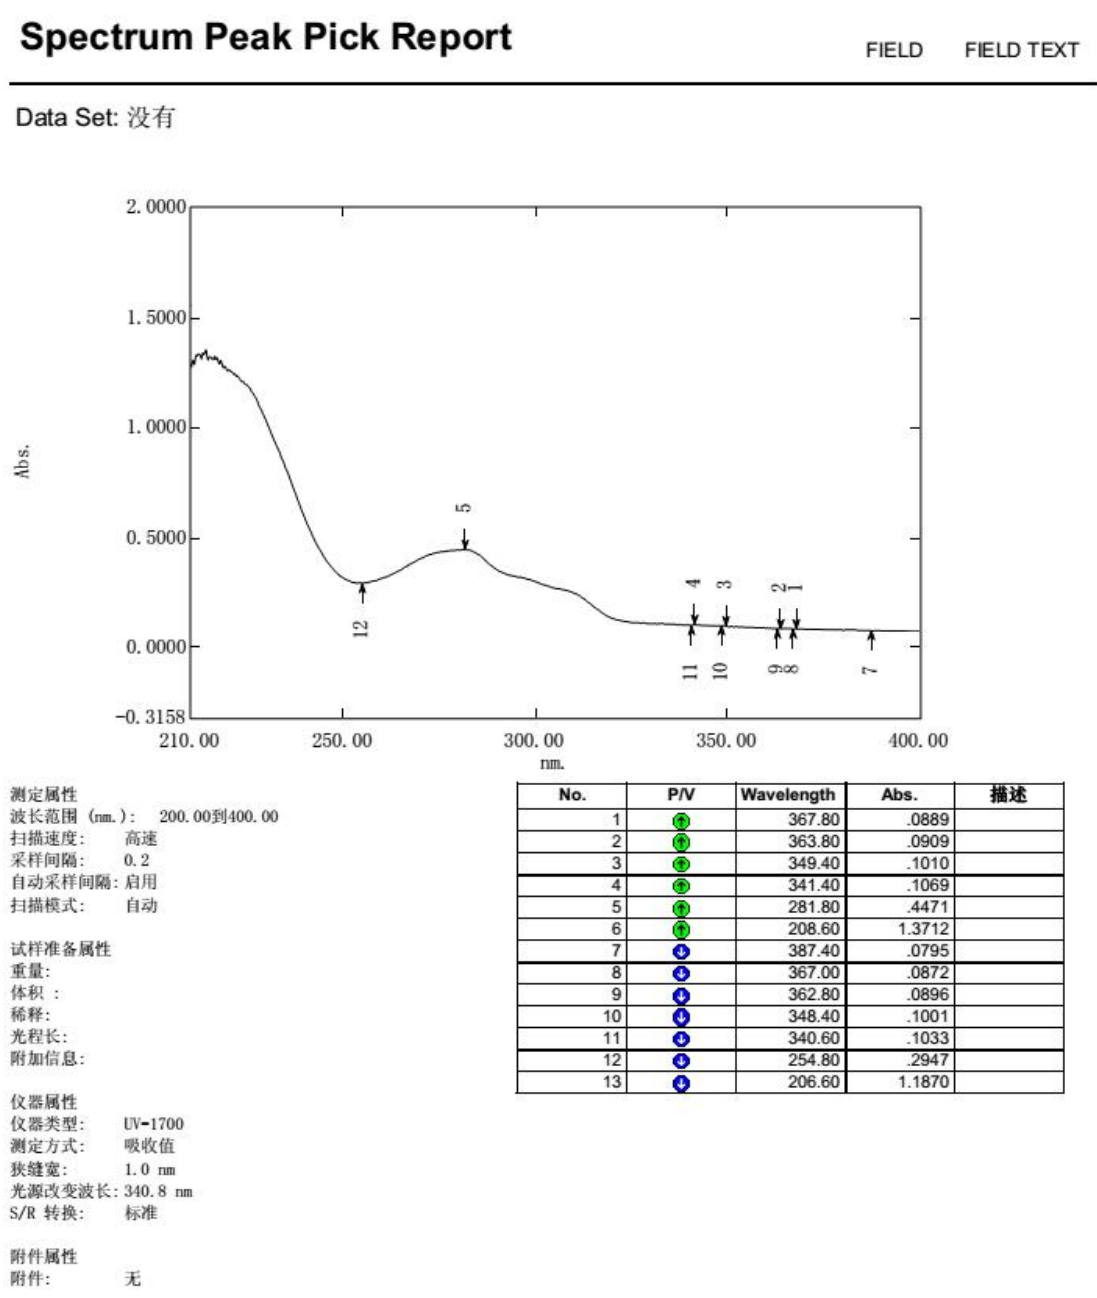

FIELD TEXT

**Figure S10.3.**  $^1\text{H}$  NMR (600 MHz,  $\text{CDCl}_3$ ) spectrum of compound **14**

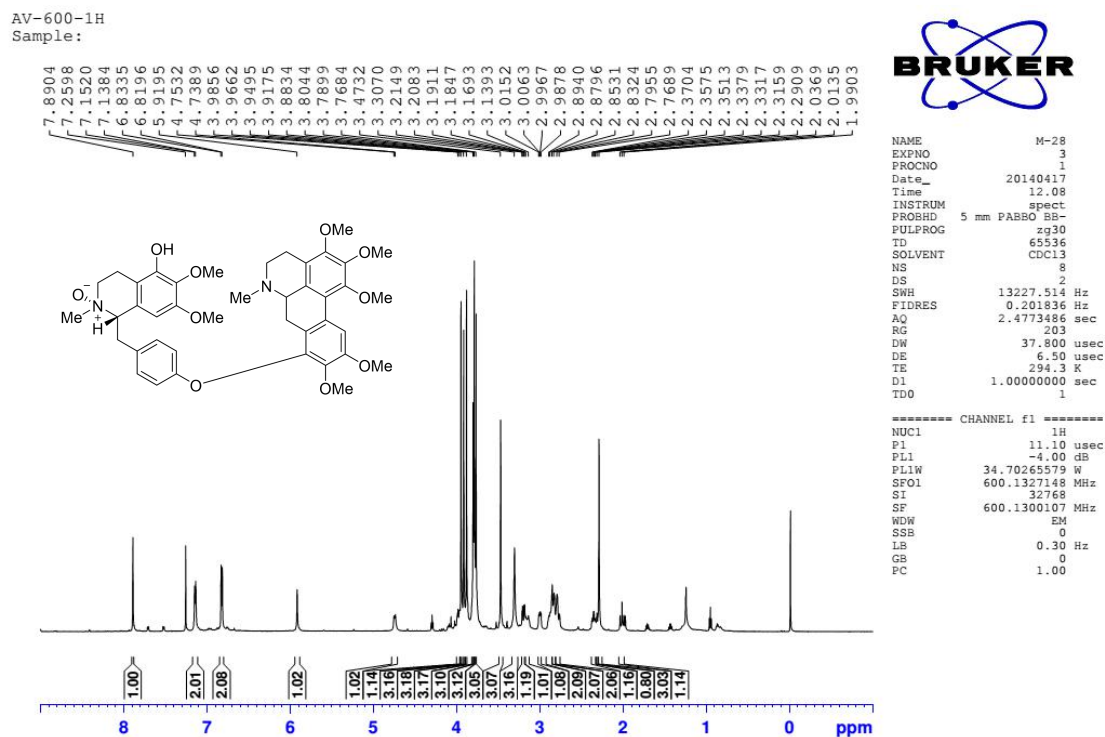

**Figure S10.4.**  $^{13}\text{C}$  NMR (100 MHz,  $\text{CDCl}_3$ ) spectrum of compound **14**

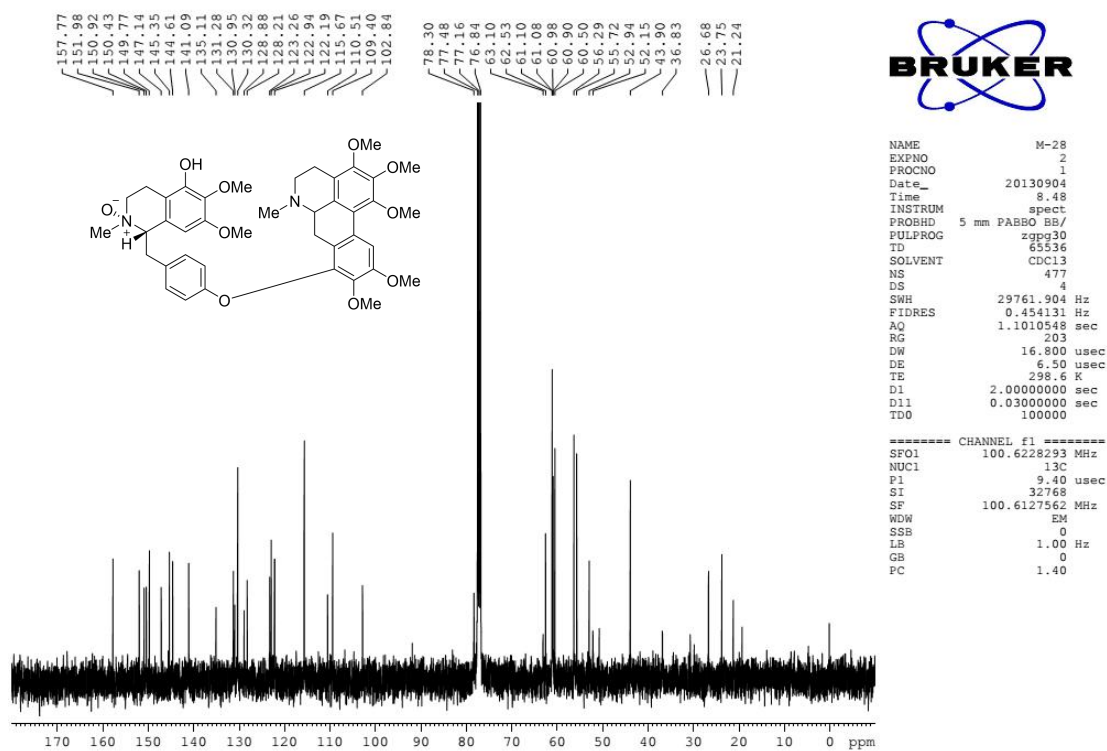

Figure S10.5. HSQC (600 MHz, CDCl<sub>3</sub>) spectrum of compound 14

AV-600-HSQC  
Sample:

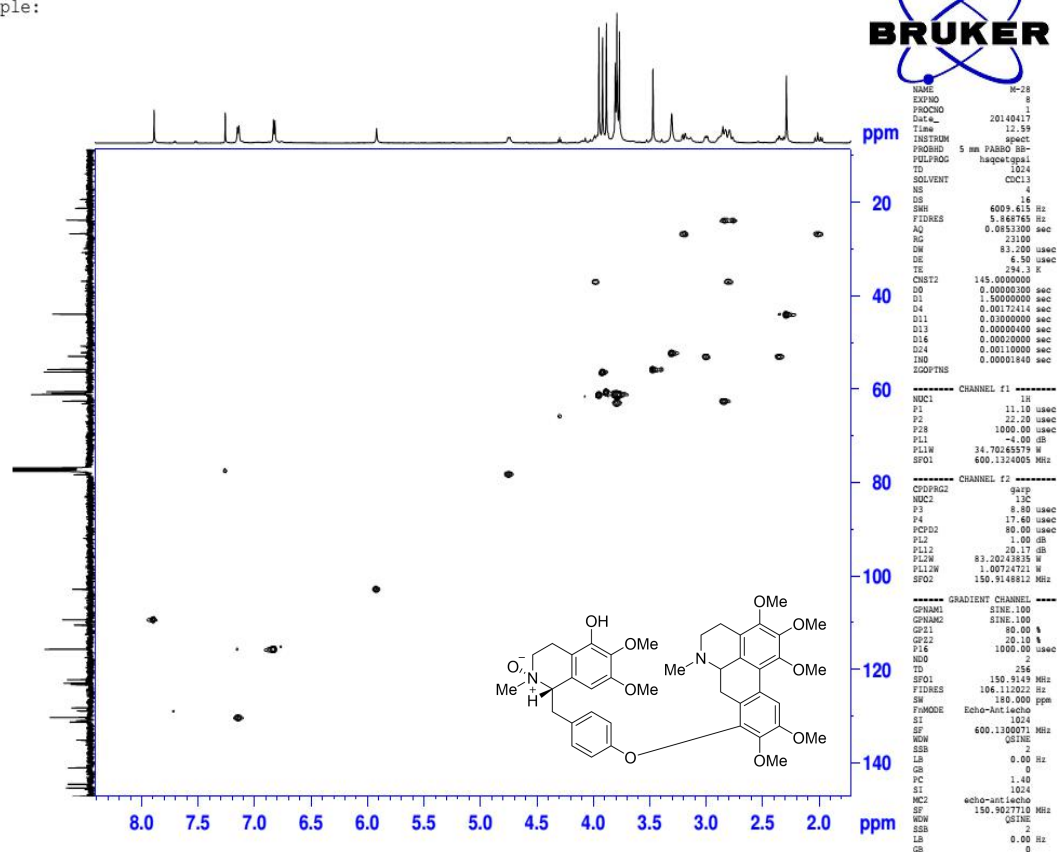

Figure S10.6. HMBC (600 MHz, CDCl<sub>3</sub>) spectrum of compound 14

AV-600-HMBC  
Sample:

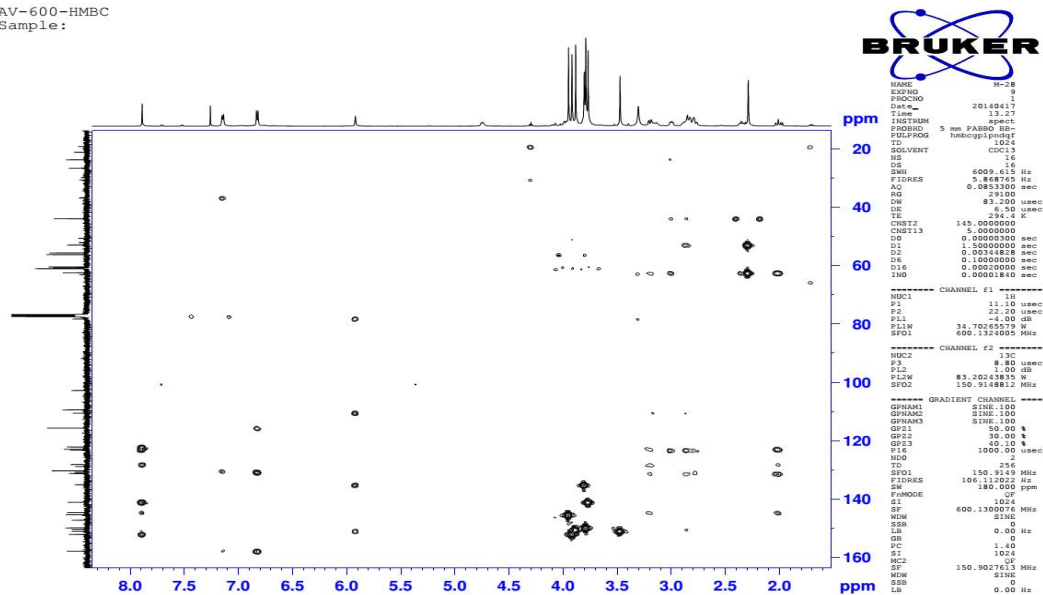

**Figure S10.7.** NOESY (600 MHz, CDCl<sub>3</sub>) spectrum of compound **14**

AV-600-NOESY  
Sample:

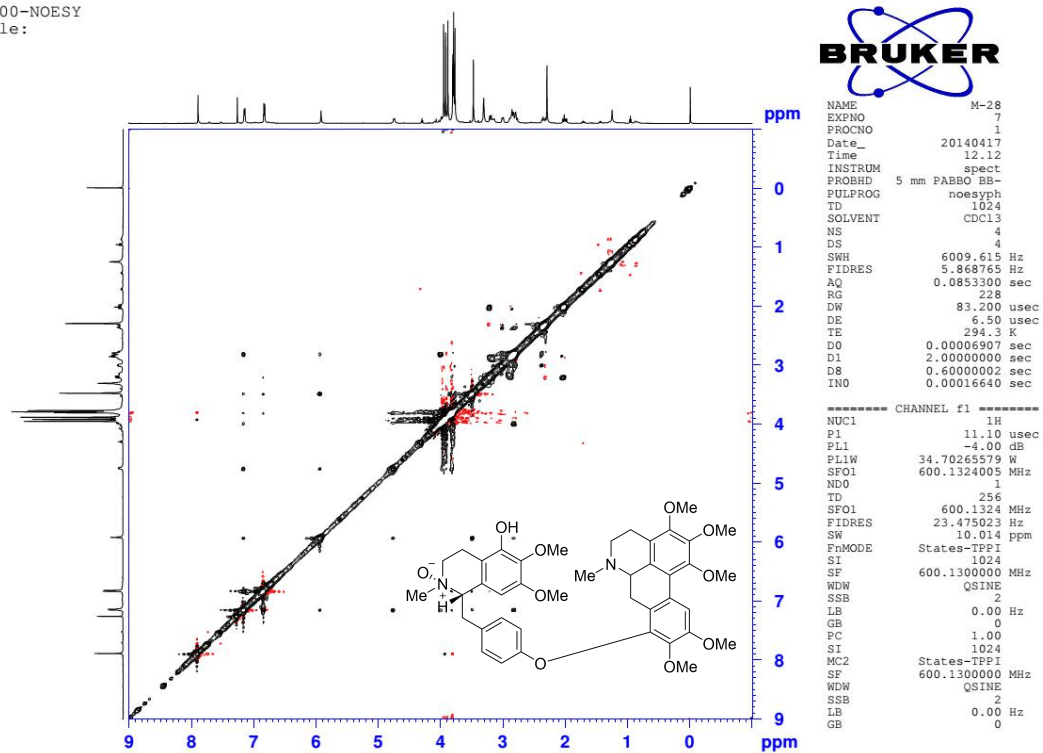

Figure S10.8. HRESIMS of compound 14

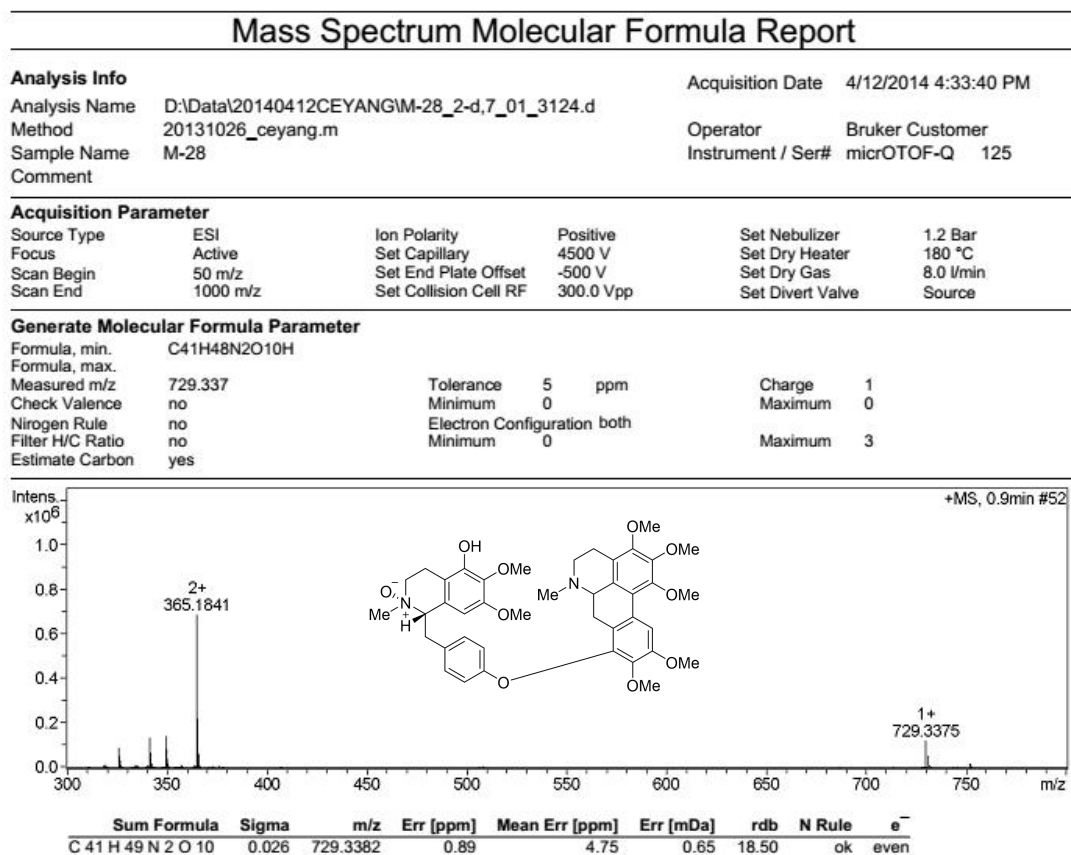

**Figure S10.9.** ECD spectrum of compound **14**

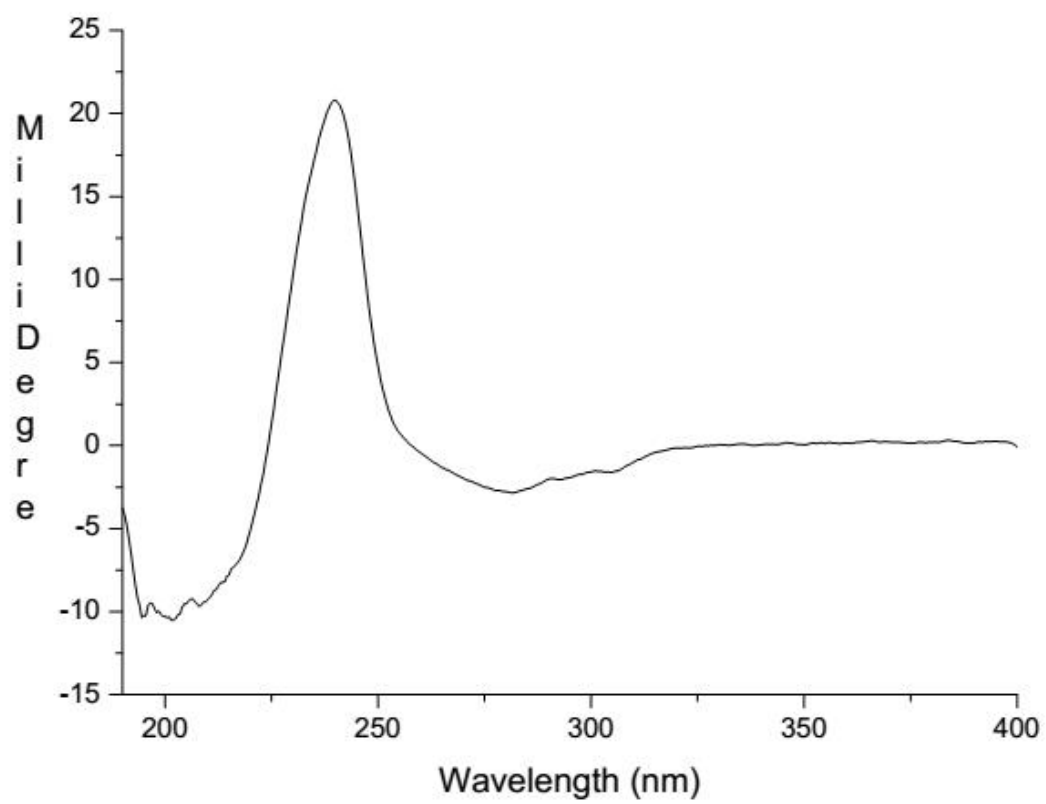

**Figure S10.10.** Key NOESY correlations of compound **14**

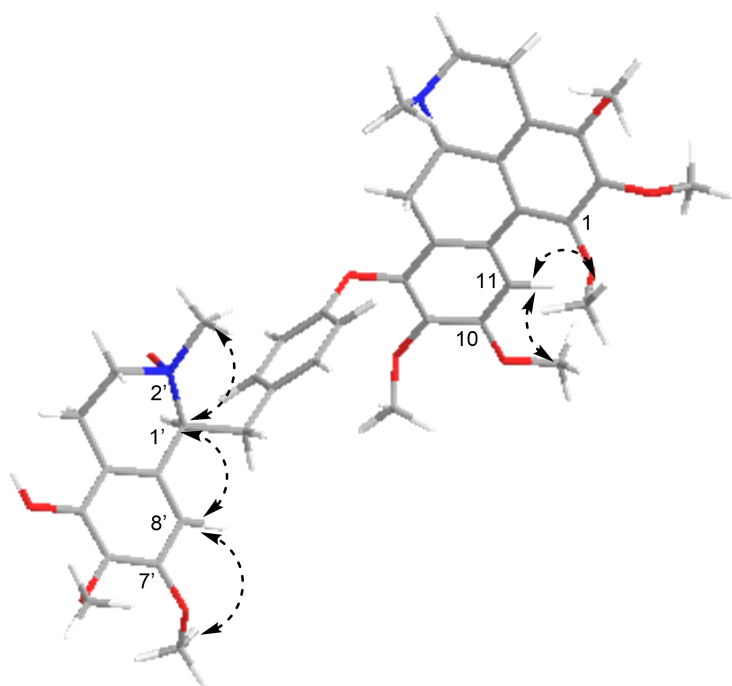



**Figure S11.1.** IR spectrum of compound **15**

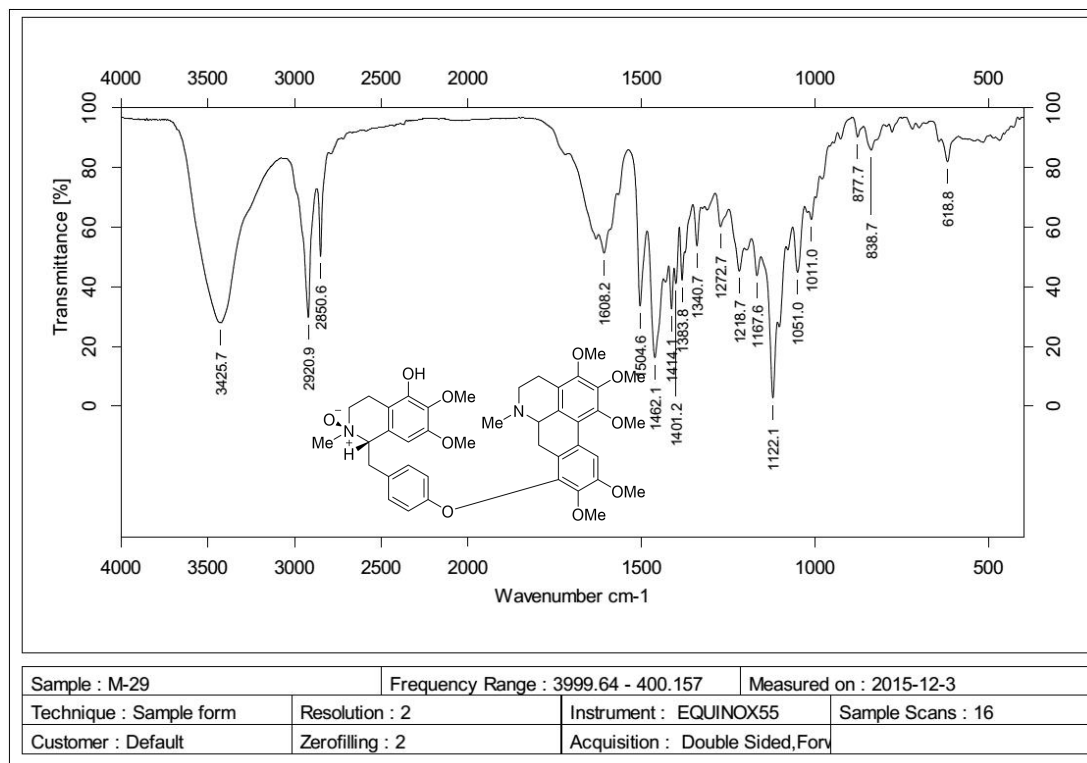

**Figure S11.2.**  $^1\text{H}$  NMR (400 MHz,  $\text{CDCl}_3$ ) spectrum of compound **15**

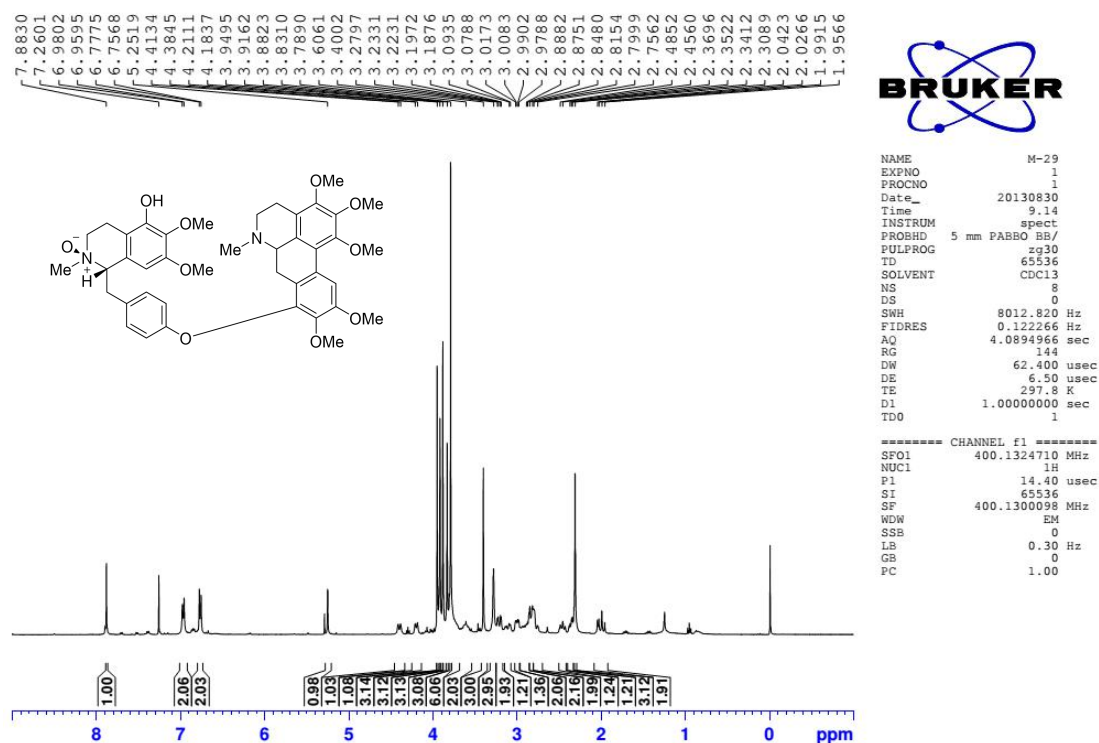

**Figure S11.3.**  $^{13}\text{C}$  NMR (100 MHz,  $\text{CDCl}_3$ ) spectrum of compound **15**

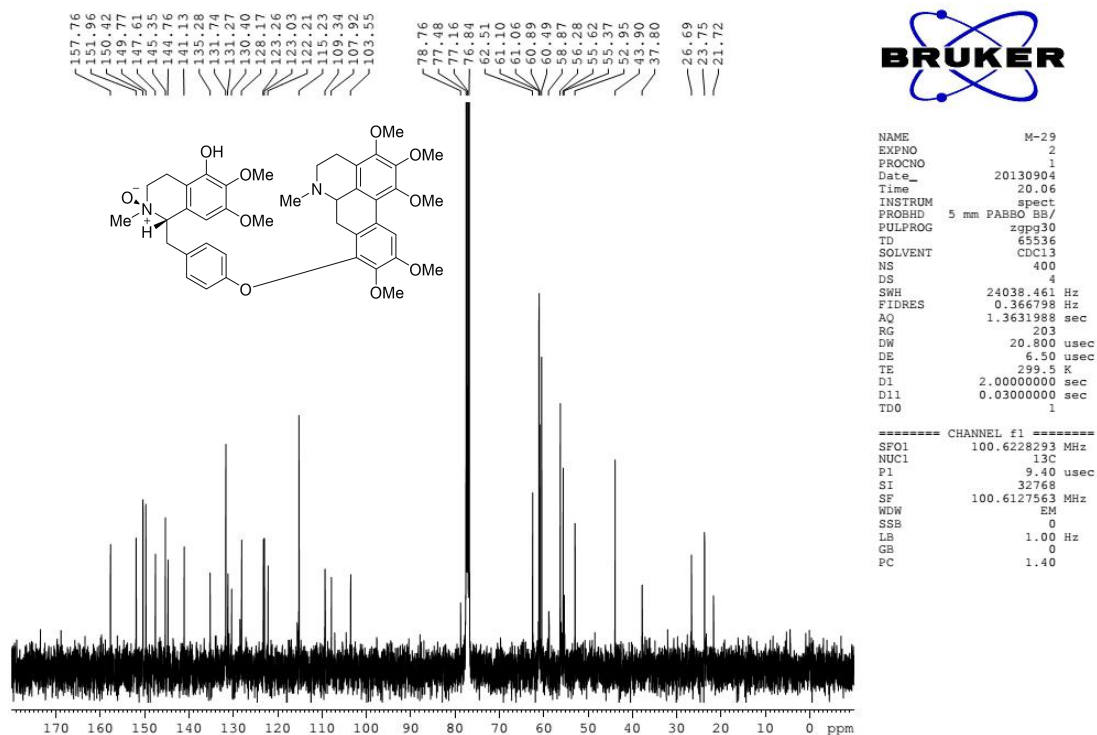

**Figure S11.4.** NOESY (600 MHz, CDCl<sub>3</sub>) spectrum of compound **15**

AV-600-NOESY  
Sample:

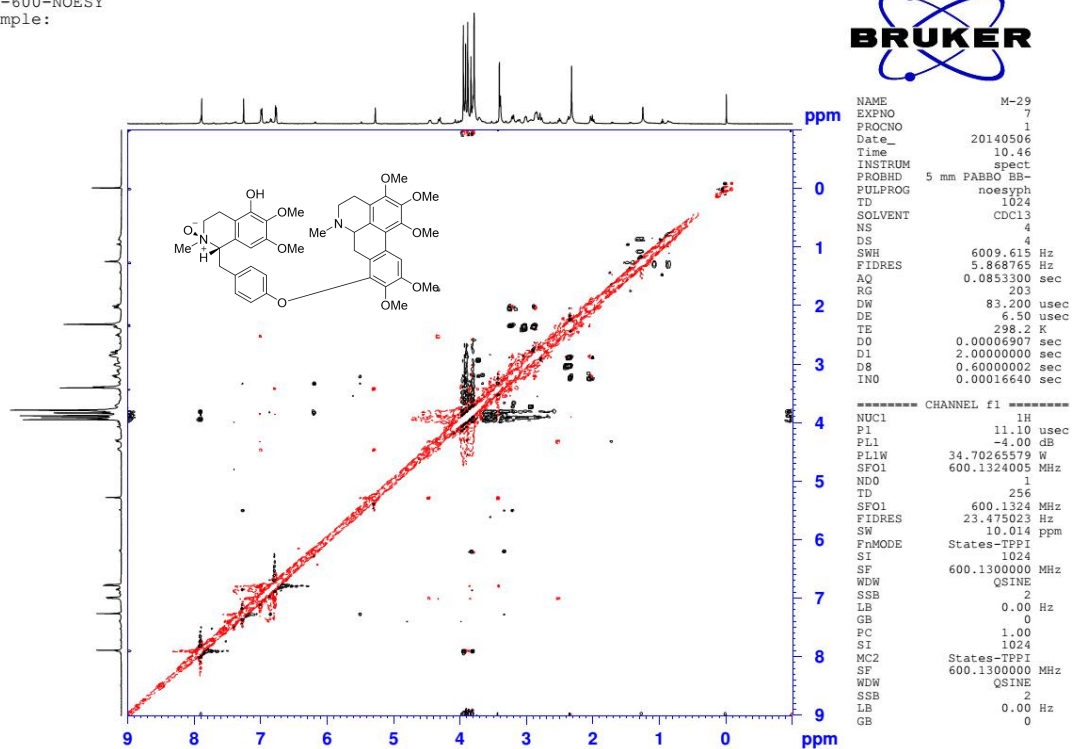

Figure S11.5. HRESIMS of compound 15

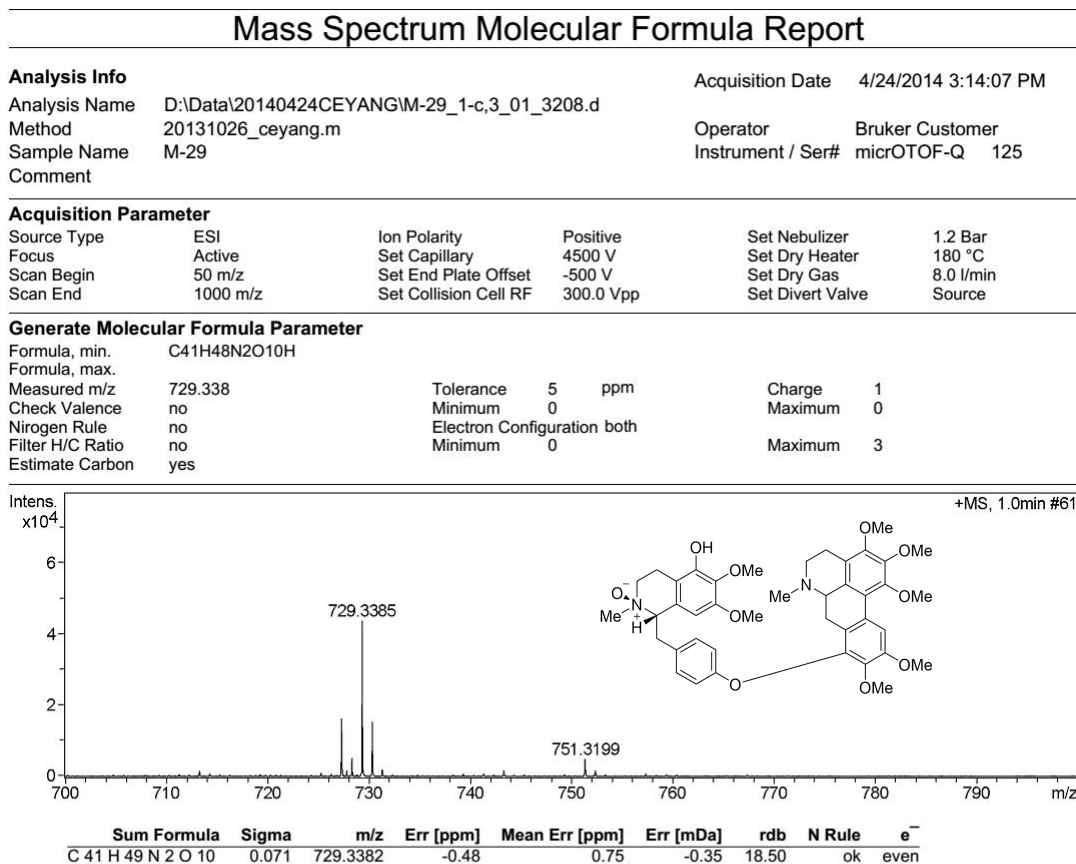

**Figure S11.6.** ECD spectrum of compound **15**

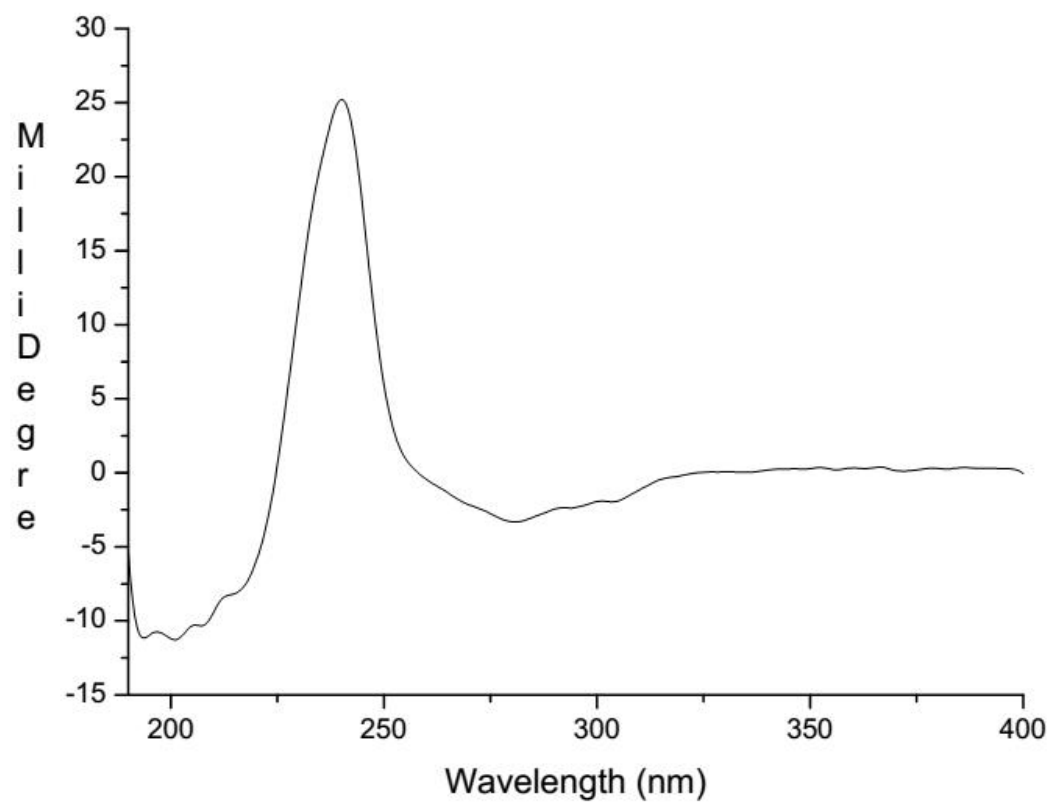

**Figure S12.1.** IR spectrum of compound **16**

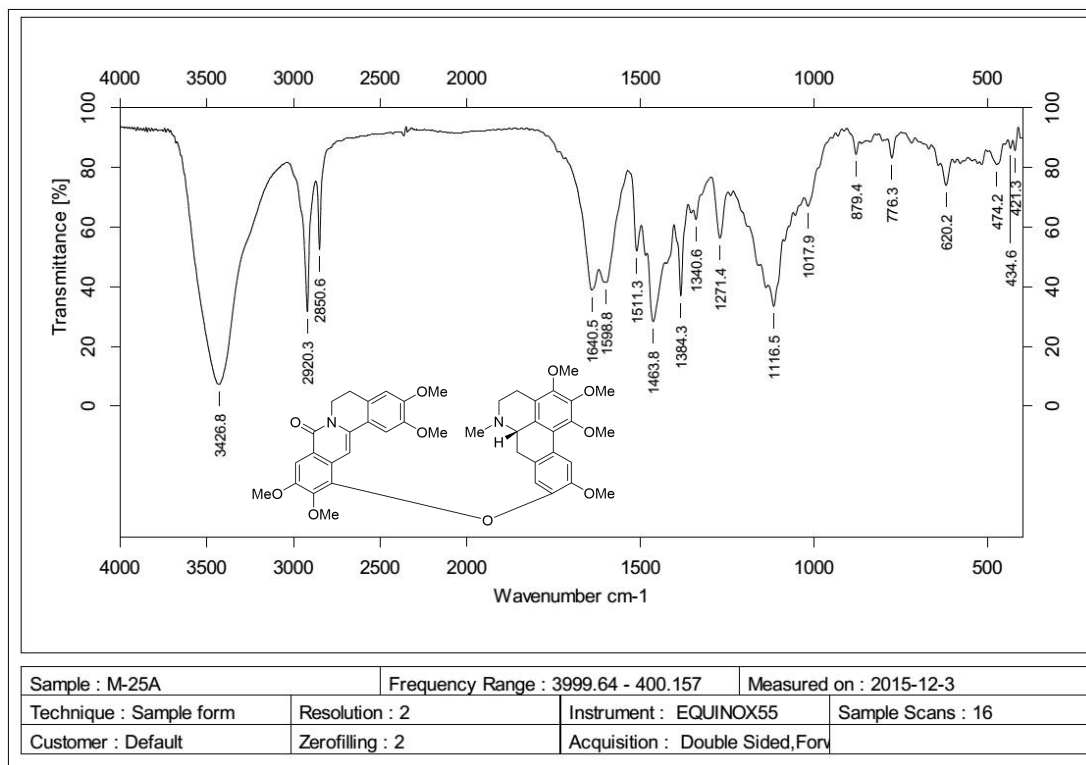

Figure S12.2. UV spectrum of compound 16

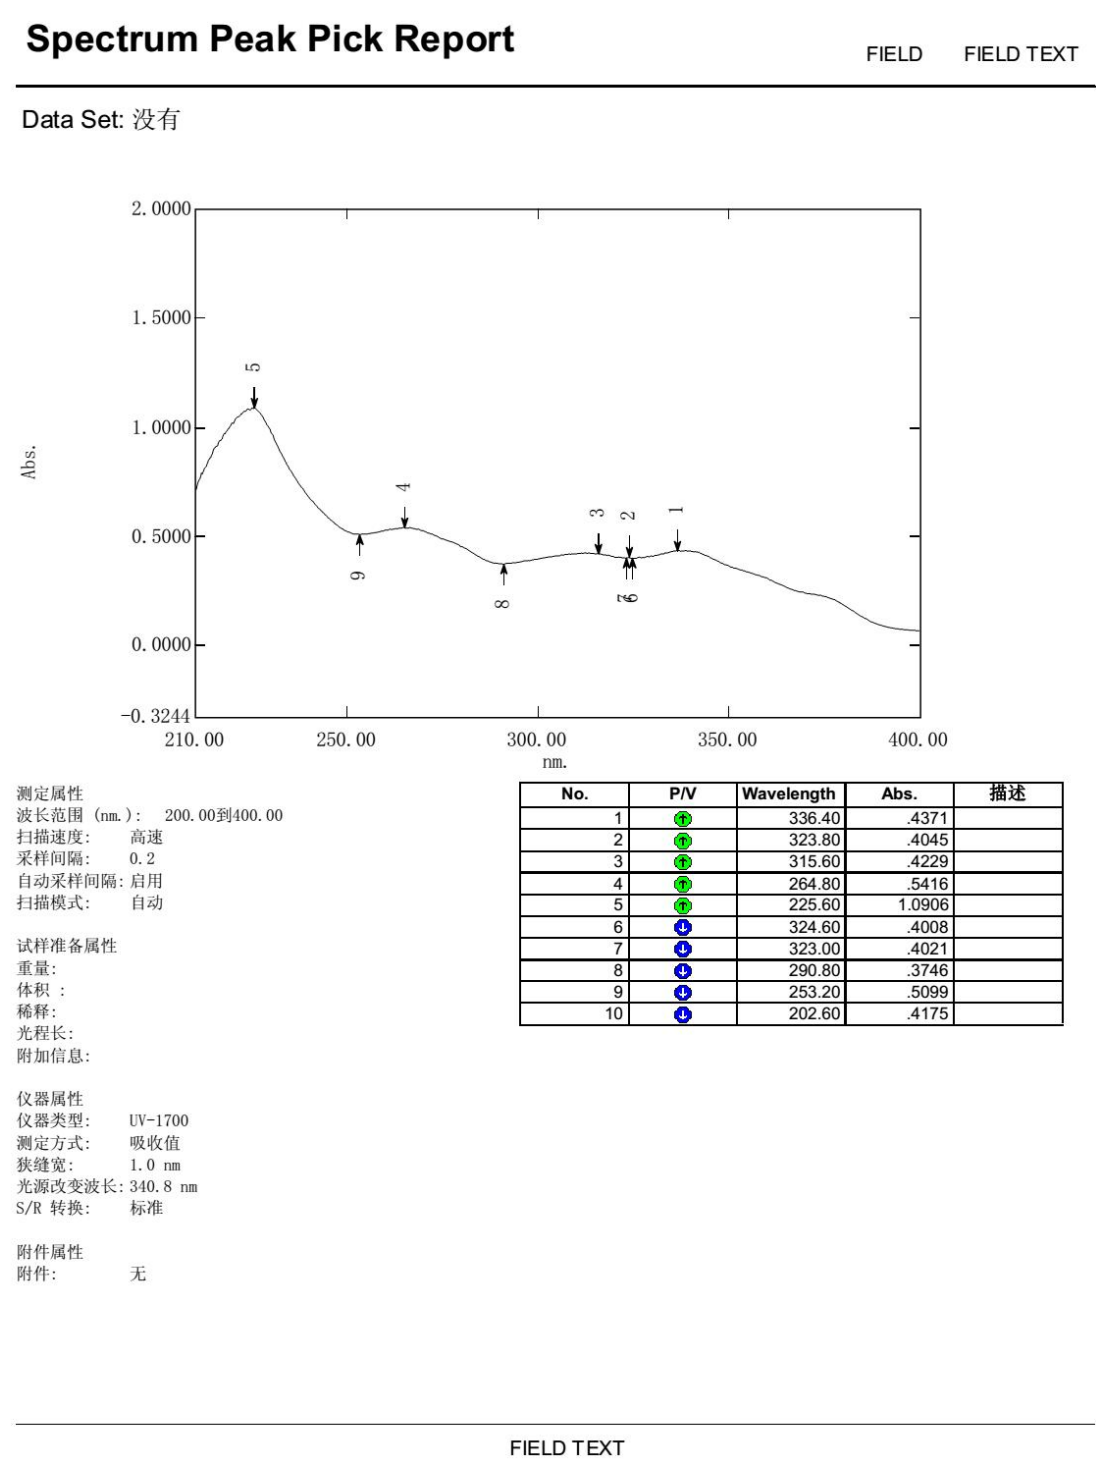

**Figure S12.3.**  $^1\text{H}$  NMR (600 MHz,  $\text{CDCl}_3$ ) spectrum of compound **16**

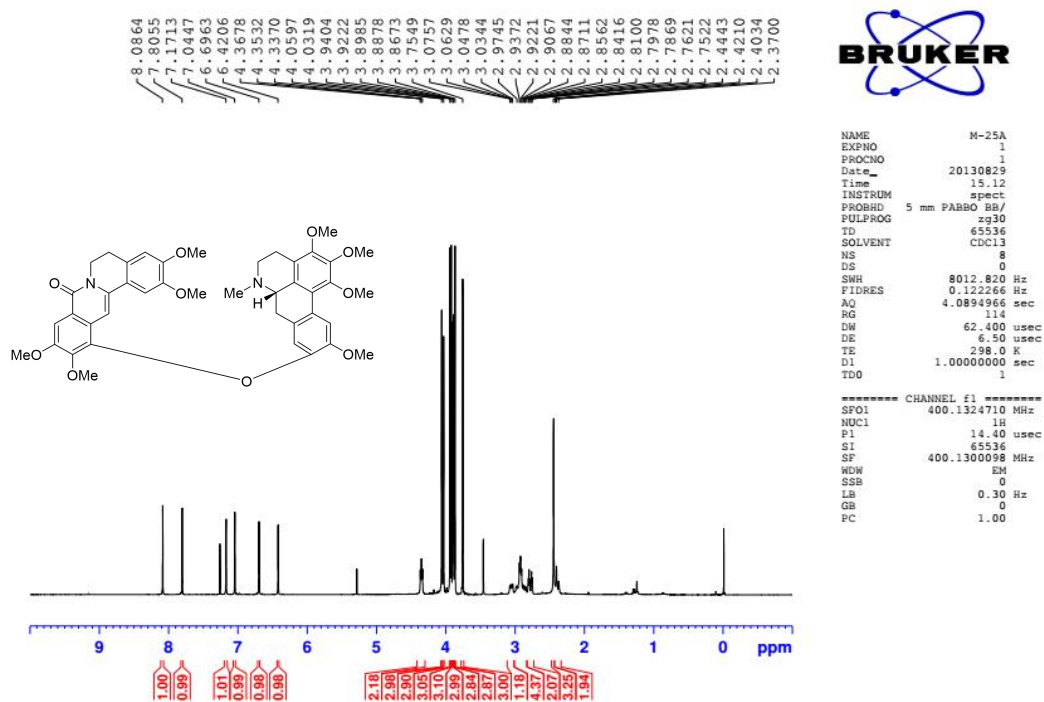

**Figure S12.4.**  $^{13}\text{C}$  NMR (100 MHz,  $\text{CDCl}_3$ ) spectrum of compound **16**

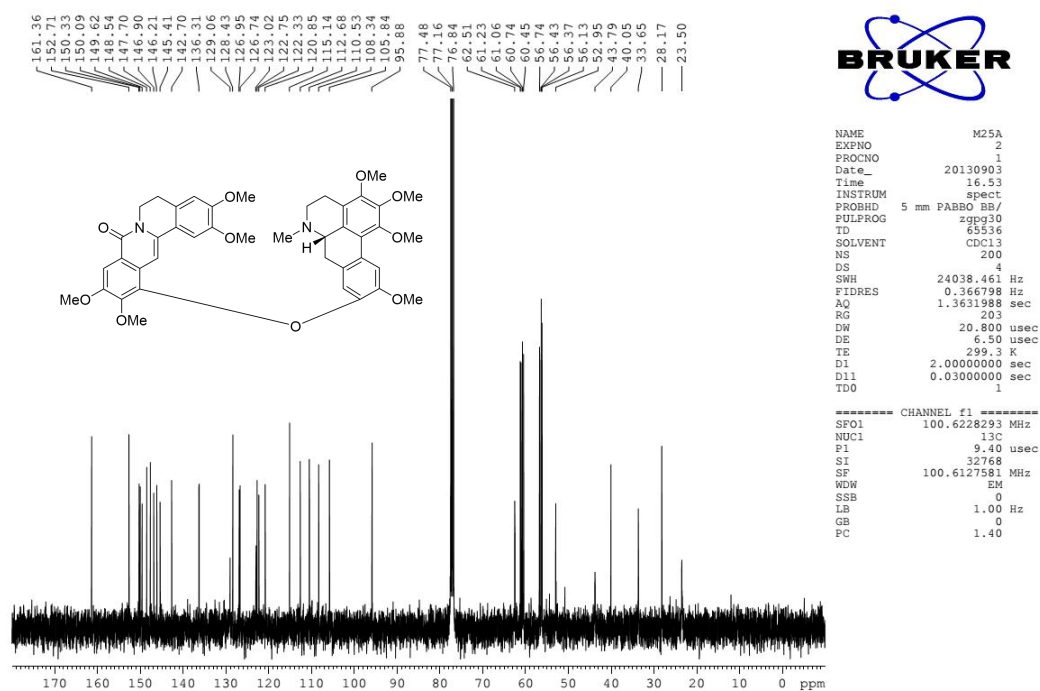



**Figure S12.5.** HSQC (600 MHz, CDCl<sub>3</sub>) spectrum of compound 16

AV-600-HSQC  
Sample:

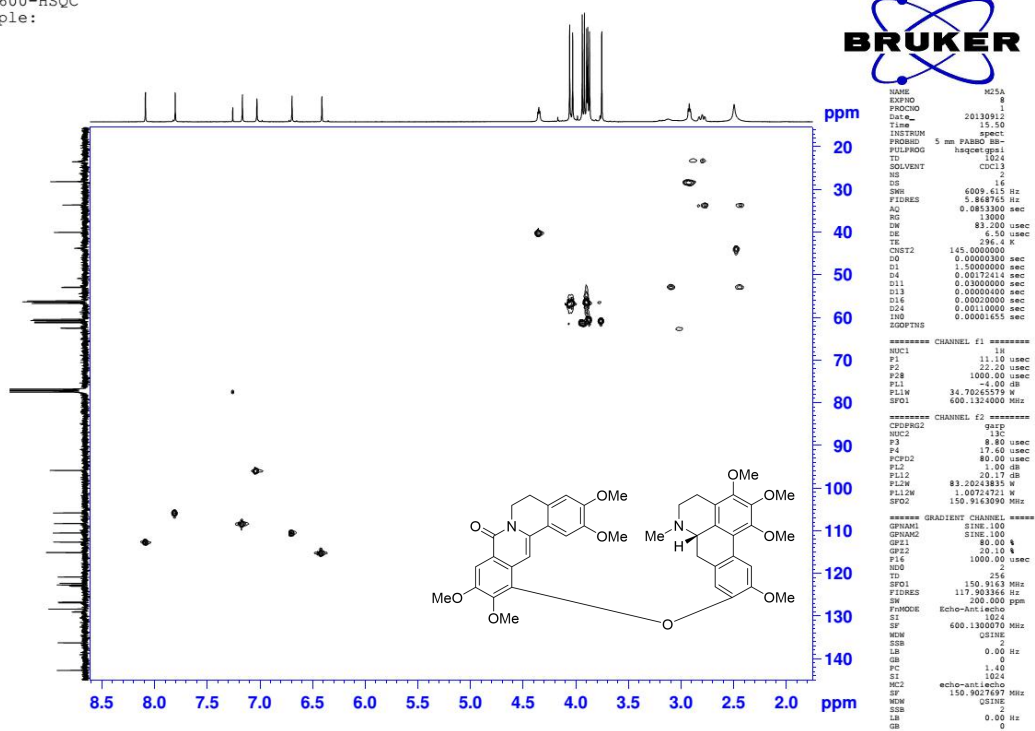

**Figure S12.6.** HMBC (600 MHz, CDCl<sub>3</sub>) spectrum of compound 16

AV-600-HMBC  
Sample:

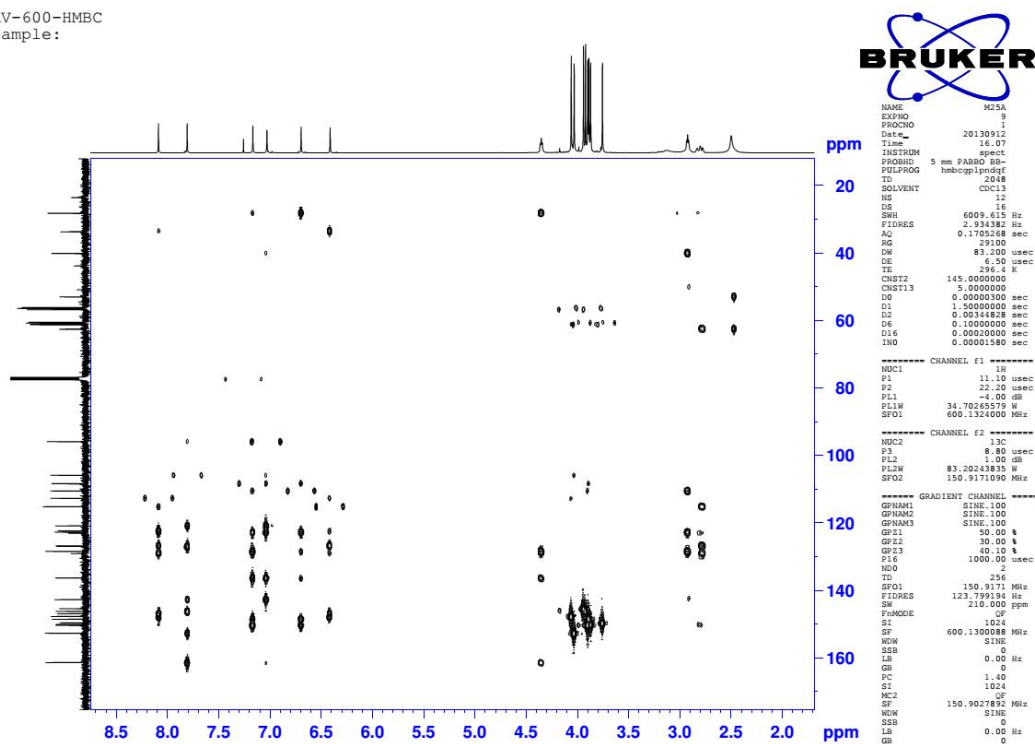

**Figure S12.7.** NOESY (600 MHz, CDCl<sub>3</sub>) spectrum of compound **16**

AV-600-NOESY  
Sample:

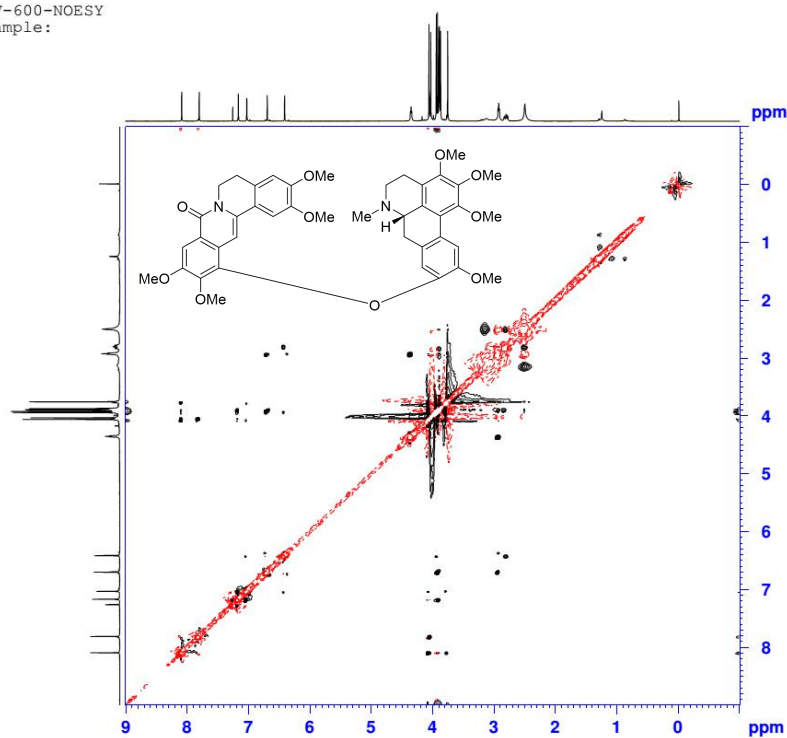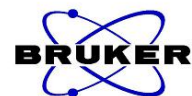

```

NAME      M25A
EXPNO     6
PROCNO    1
Date_     20140418
Time      10.14
INSTRUM   spect
PROBHD    5 mm PABBO BB-
PULPROG   noesyph
TD         1024
SOLVENT   CDCl3
NS         2
DS         4
SWH        6009.615 Hz
FIDRES     5.868765 Hz
AQ         0.0853300 sec
RG         228
DW         83.200 usec
DE         6.50 usec
TE         294.4 K
D0         0.00006918 sec
D1         2.00000000 sec
D8         0.60000002 sec
IN0        0.00016665 sec

===== CHANNEL f1 =====
NUC1       1H
P1         11.10 usec
PL1        -4.00 dB
PL1W       34.70265579 W
SF01       600.1324000 MHz
ND0        1
TD         256
SF01       600.1324 MHz
FIDRES     23.442673 Hz
SW         10.000 ppm
FnMODE     States-TPPI
SI         1024
SF         600.1300000 MHz
WDW        QSINE
SSB        2
LB         0.00 Hz
GB         0
PC         1.00
SI         1024
MC2        States-TPPI
SF         600.1300000 MHz
WDW        QSINE
SSB        2
LB         0.00 Hz
GB         0
    
```

**Figure S12.8.** HRESIMS of compound **16**

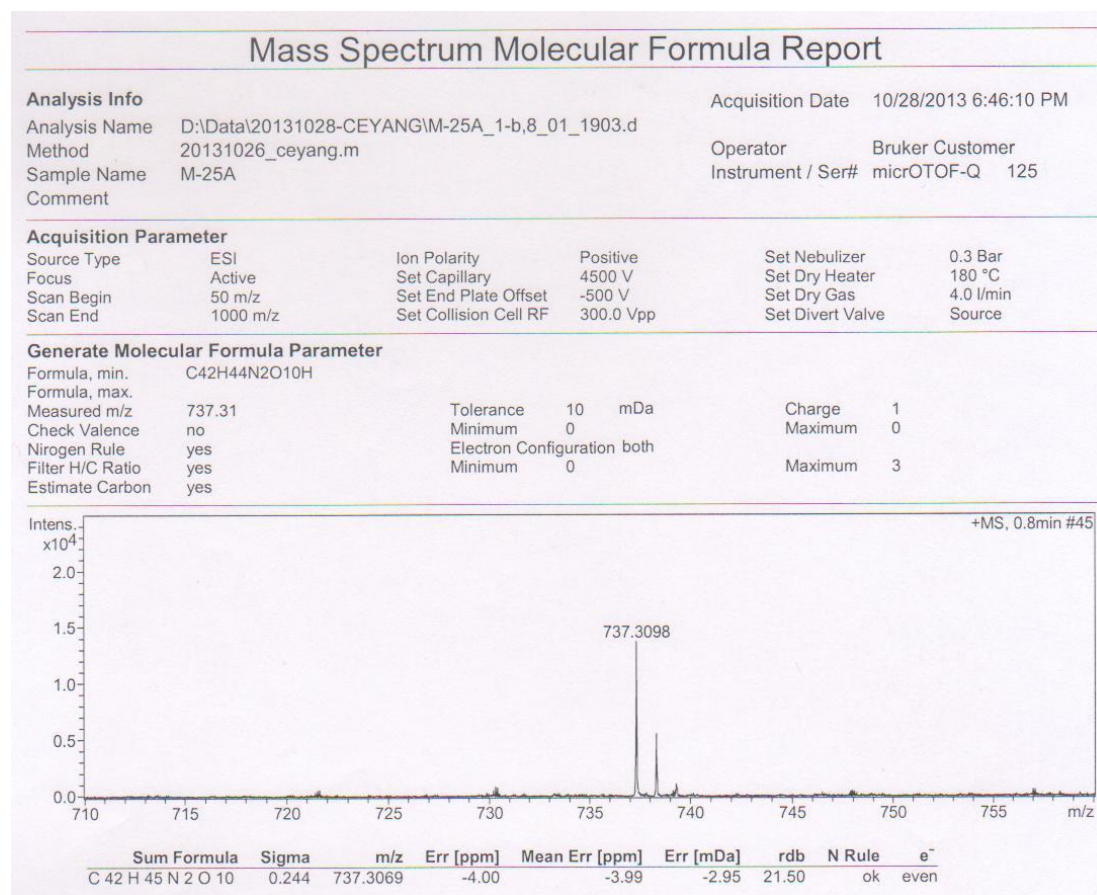

**Figure S12.9.** ECD spectrum of compound **16**

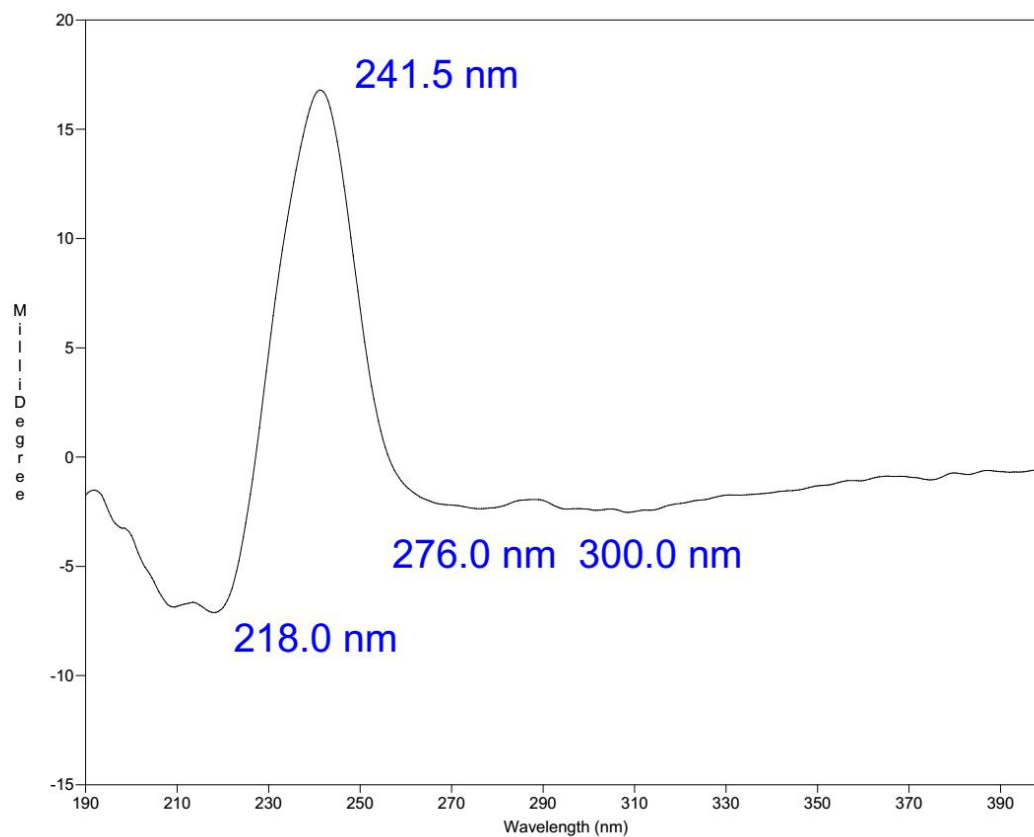

Bio-Kine Software V4.71 Date : 2014-3-7 Time : 14:03:50

**COMMENTS :**

File name : sav-golay  
Savitzky-Golay Smooth of sav-golay  
Window Points=15  
Polynomial Order=3  
Derivative=0
